# Supplementary material
Source: ML conference proceedings conference paper supplement (https://openaccess.thecvf.com/content/CVPR_2019/html/Schwartz_Factor_Graph_Attention_CVPR_2019_paper.html)
Supplement: Supplementary file 1 [file Schwartz_Factor_Graph_Attention_CVPR_2019_supplemental.pdf]

# Supplementary Material: Factor Graph Attention

Idan Schwartz<sup>1</sup>, Seunghak Yu<sup>2,\*</sup>, Tamir Hazan<sup>1</sup>, Alexander Schwing<sup>3</sup>

<sup>1</sup>Technion <sup>2</sup>MIT CSAIL <sup>3</sup>UIUC

idansc@cs.technion.ac.il, seunghak@csail.mit.edu, tamir.hazan@technion.ac.il, aschwing@illinois.edu

In this supplementary material we provide additional quantitative (see Sec. 1) and qualitative (see Sec. 2) results.

## 1. Quantitative Evaluation

**Ensemble model for VisDial v0.9:** For VisDial v1.0, a simple ensemble technique has significantly improved the results as discussed in the main paper. We observe a similar effect for VisDial v0.9, pushing the current state of the art for MRR from 0.6525 to 0.6892 as summarized in Tab. 1. We achieve this result with an ensemble of 9 models which differ only by the initial seed. For VisDial v1.0 we report a 5 model ensemble score. Due to restriction of the number of submissions to the evaluation server we could not evaluate a larger ensemble model. The results in Tab. 1 suggest that the VisDial v1.0 score in the paper can be further improve with a larger ensemble model.

**Analysis of Factor Graph Attention weights:** To infer the attention belief for a utility, *i.e.*,  $b_i(u_i)$ , we aggregate marginalized joint and local interactions and also local-information and prior terms. To calibrate each cue, we use scalar weights, *i.e.*,  $\hat{w}_i, w_i, w_{i,j}$ . To obtain a better understanding of the reasoning process and analyze attention, we suggest an importance score:

$$S(\gamma) = \frac{|m_\gamma \cdot \gamma|}{\sum_{\delta \in \{\hat{w}_i, w_i, (w_{i,j})_{j \in \mathcal{U}}\}} |m_\delta \cdot \delta|}, \quad (1)$$

where  $\gamma \in \{\hat{w}_i, w_i, (w_{i,j})_{j \in \mathcal{U}}\}$  is the weight of a cue and  $m_\gamma$  is the mean term of the corresponding cue  $\gamma$ , which was calculated over the entire validation set. Note that  $\gamma$  are the scalar weights.  $S(w_{i,j}) \forall j \in \mathcal{U}$  captures the importance of the  $j$ -th cue for utility  $i$ . A high score means the  $i$ -th utility attention belief heavily relies on cue  $j$ . Similarly,  $S(w_{i,i}), S(w_i), S(\hat{w}_i)$  capture the importance of local-interactions, local-information and prior cues for the  $i$ -th utility. We report the scores in Tab. 2. We observe that the answer utility relies mostly on local-interactions. The question heavily relies on the prior, but also makes use of history answers and question cues. The caption ignores all utilities other than the prior. The image question utility is the most important cue. Interestingly, we observe importance of priors. Image attention relies on the captions, while the caption ignores all the cues and preserves the prior behavior. The history question and answers rely on the question and the local factors.

**Computation and insignificant interactions:** Upon training interactions may be found to be unnecessary. Our model can be optimized easily: 1) The score in Eq. (1), can be used to omit less significant interactions. Previous multimodal attention doesn't model pairwise interaction scores, making it hard to eliminate computations. 2) For the same image but different question, we can re-use calculated joint interactions, such as local-interaction, image-caption, *etc.* This is impossible for approaches that pool cues since the question changes. 3) As mentioned in Sec. 4.2, it's possible to share weights between similar utilities, *e.g.*, different history questions/answers.

Currently, we don't consider most of those options, as the model trains quickly (8 hours vs. 33 hours of previous state-of-the-art) and fits into a single 12GB GPU.

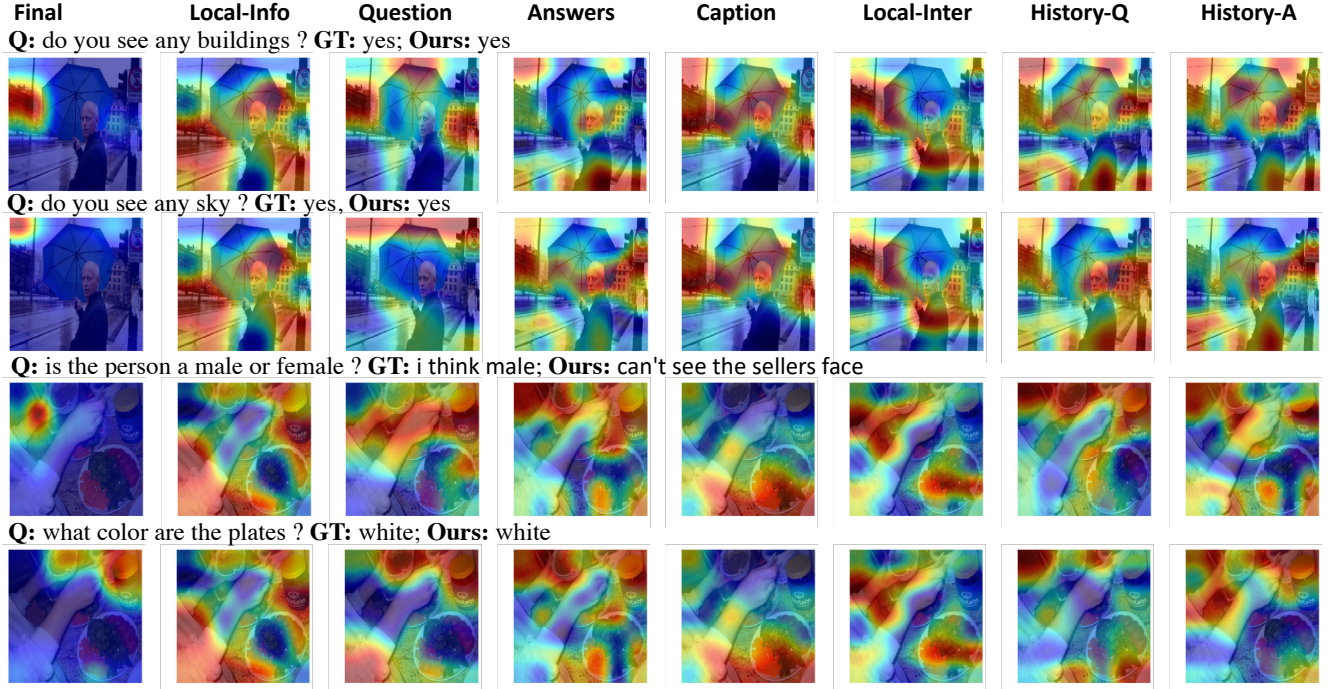

Figure 1: Two images each with two questions. We illustrate scores obtained from different types of factors. Local-info denotes ‘Image-Local-Information,’ Question refers to ‘Image-Question,’ etc. We observe ‘Image-Question’ to have the highest variance between different questions, since its heat map differs the most. ‘Image-Question’ also correlates the most with the final attention.

Table 1: Analysis of ensemble models for VisDial v0.9. With an ensemble of 9 models we observe an improvement of more than 3% over the single model.

| Model             | MRR           | R@1          | R@5          | R@10         | Mean        |
|-------------------|---------------|--------------|--------------|--------------|-------------|
| FGA               | 0.6525        | 51.43        | 82.08        | 89.56        | 4.35        |
| Ensemble of 2 FGA | 0.6711        | 53.56        | 83.83        | 90.97        | 3.92        |
| Ensemble of 3 FGA | 0.6786        | 54.28        | 84.71        | 91.69        | 3.73        |
| Ensemble of 4 FGA | 0.6819        | 54.56        | 85.19        | 92.10        | 3.62        |
| Ensemble of 5 FGA | 0.6848        | 54.82        | 85.57        | 92.38        | 3.55        |
| Ensemble of 6 FGA | 0.6860        | 54.95        | 85.71        | 92.52        | 3.50        |
| Ensemble of 7 FGA | 0.6869        | 54.97        | 85.91        | 92.67        | 3.47        |
| Ensemble of 8 FGA | 0.6881        | 55.10        | 86.04        | 92.77        | 3.44        |
| Ensemble of 9 FGA | <b>0.6892</b> | <b>55.16</b> | <b>86.26</b> | <b>92.95</b> | <b>3.39</b> |

Table 2: For each utility (column) we show the three most related cues based on the  $S$  score given in Eq. (1). We provide  $S$  in parenthesis.  $P$ ,  $L_1$  and  $L_2$  indicate prior, local-information and local-interactions of the utility in the column.

| A                   | Q                 | C                 | I                 | $H_Q$             | $H_A$               |
|---------------------|-------------------|-------------------|-------------------|-------------------|---------------------|
| $\bar{L}_1$ (0.125) | $\bar{P}$ (0.851) | $\bar{P}$ (0.988) | $\bar{Q}$ (0.593) | $\bar{Q}$ (0.205) | $\bar{L}_2$ (0.607) |
| $H_Q$ (0.122)       | $H_A$ (0.052)     | $I$ (0.004)       | $L_1$ (0.186)     | $L_1$ (0.121)     | $Q$ (0.304)         |
| $Q$ (0.075)         | $H_Q$ (0.031)     | $A$ (0.001)       | $C$ (0.123)       | $L_2$ (0.085)     | $L_1$ (0.017)       |

## 2. Qualitative Evaluation

**Factors visualization:** We provide additional visualization in Fig. 1. We visualize scores for each image region obtained from different types of factors. ‘Image-Local-Information,’ ‘Image-Caption’ and ‘Image-Local-Interaction’ are constant for different questions, while ‘Image-Question,’ ‘Image-Answer,’ ‘Image-History-Q’ and ‘Image-History-A’ change for every question. We calculated the variance of interactions and observe that ‘Image-Question’ has the highest variance ( $\approx 3$ ), while ‘Image-Answer,’ ‘Image-History-Q’ and ‘Image-History-A’ have a variance of  $\approx 1$ . Beyond the importance score, the high-variance also suggests that the ‘Image-Question’ cue is most important.

**Attention over dialogs:** In Fig. 2, we present a randomly-picked set of 50 images along with their corresponding dialogs. An automatic script is used to generate the figures. We highlight that image attention is aware of the scene in the question context, and able to attend to correct foreground or background regions. Question attention attends to informative words, and answer attention frequently correlates with the predicted answer. History attention emphasizes nuances.

Figure 2: 50 dialogs along with question, answers and history attention. The predicted answer (*i.e.*, A) and ground-truth answer (*i.e.*, GT) are also provided.

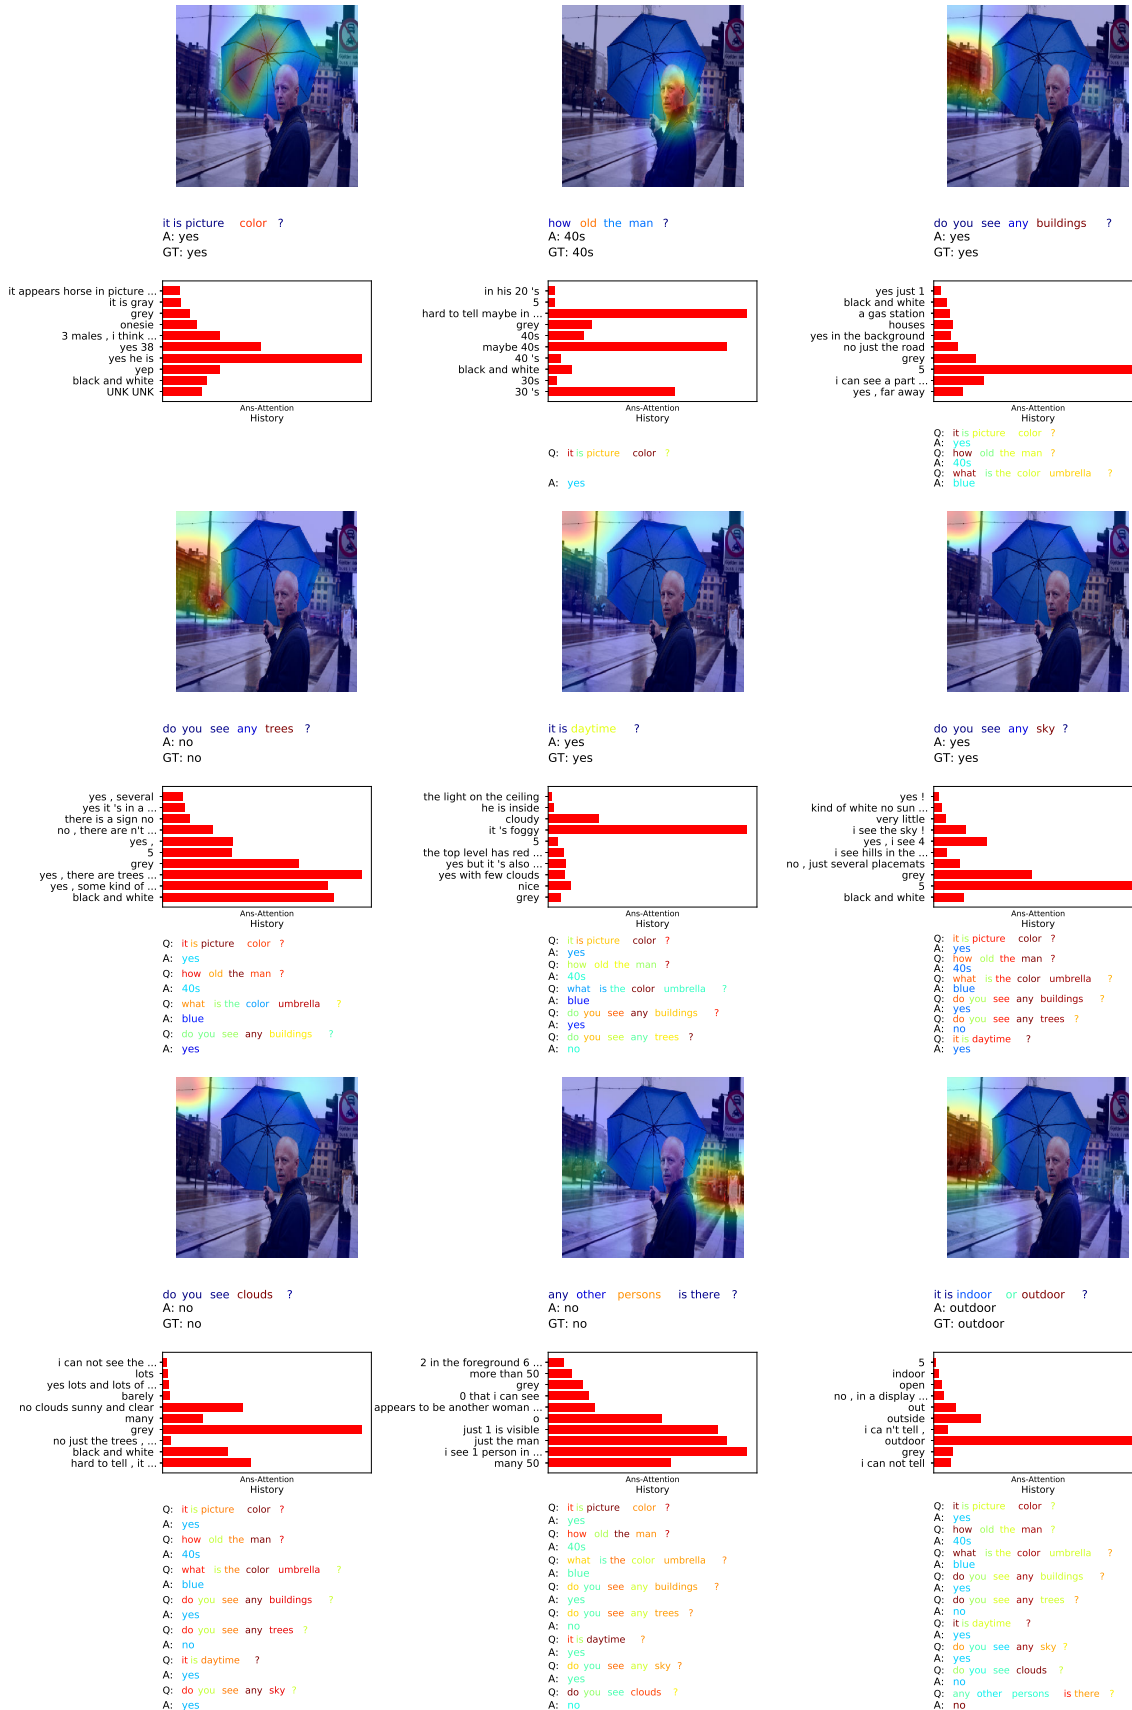



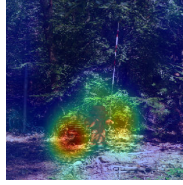

is the image in color ?  
A: yes  
GT: yes

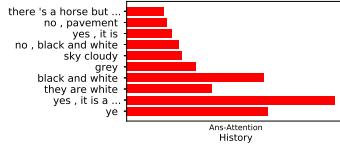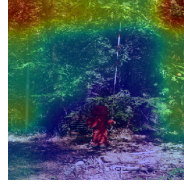

is it daytime ?  
A: yes  
GT: yes

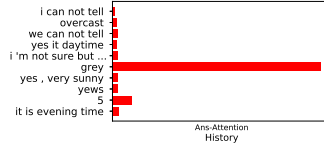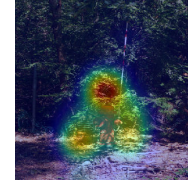

what color is the fire hydrant ?  
A: red  
GT: red

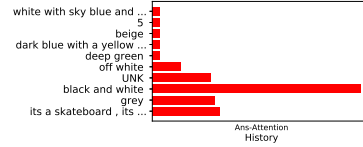

Q: is the image in color ?  
A: yes  
Q: is it daytime ?  
A: yes

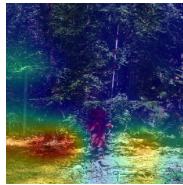

what season ?  
A: maybe summer  
GT: maybe summer

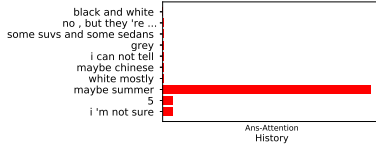

Q: is the image in color ?  
A: yes  
Q: is it daytime ?  
A: yes  
Q: what color is the fire hydrant ?  
A: red

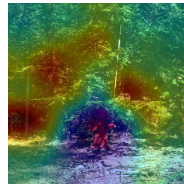

Q: are there any leaves on the ground ?  
A: yes  
GT: no

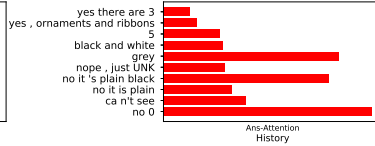

Q: is the image in color ?  
A: yes  
Q: is it daytime ?  
A: yes  
Q: what color is the fire hydrant ?  
A: red  
Q: what season ?  
A: maybe summer

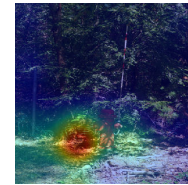

are there people present ?  
A: no  
GT: no

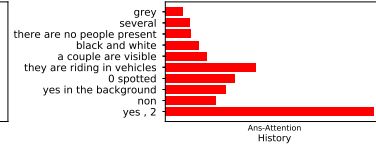

Q: is the image in color ?  
A: yes  
Q: is it daytime ?  
A: yes  
Q: what color is the fire hydrant ?  
A: red  
Q: what season ?  
A: maybe summer  
Q: are there any leaves on the ground ?  
A: no

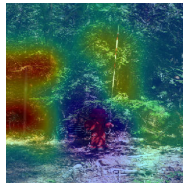

are there any fallen logs ?  
A: no  
GT: no

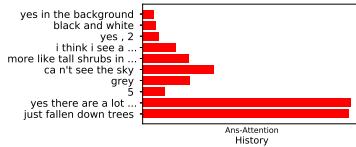

Q: is the image in color ?  
A: yes  
Q: is it daytime ?  
A: yes  
Q: what color is the fire hydrant ?  
A: red  
Q: what season ?  
A: maybe summer  
Q: are there any leaves on the ground ?  
A: no  
Q: are there people present ?  
A: no

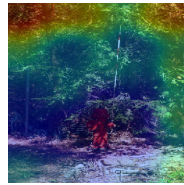

can you see the sky ?  
A: no  
GT: no

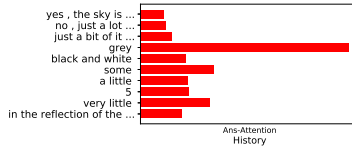

Q: is the image in color ?  
A: yes  
Q: is it daytime ?  
A: yes  
Q: what color is the fire hydrant ?  
A: red  
Q: what season ?  
A: maybe summer  
Q: are there any leaves on the ground ?  
A: no  
Q: are there people present ?  
A: no  
Q: are there any fallen logs ?  
A: no

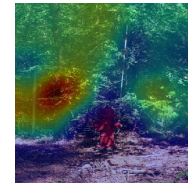

are there a lot of trees ?  
A: yes  
GT: yes

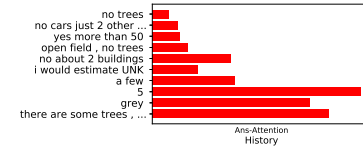

Q: is the image in color ?  
A: yes  
Q: is it daytime ?  
A: yes  
Q: what color is the fire hydrant ?  
A: red  
Q: what season ?  
A: maybe summer  
Q: are there any leaves on the ground ?  
A: no  
Q: are there people present ?  
A: no  
Q: are there any fallen logs ?  
A: no  
Q: can you see the sky ?  
A: no

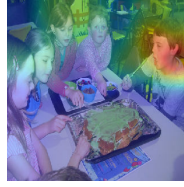

is this a party ?  
A: no  
GT: maybe

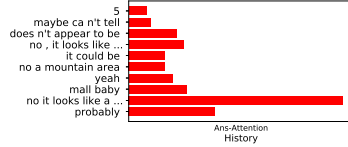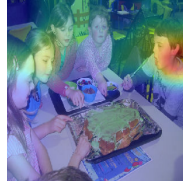

are there lots of kids ?  
A: 5 kids  
GT: 5 kids

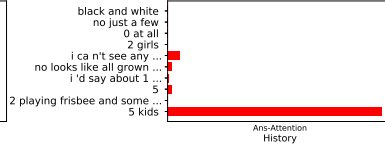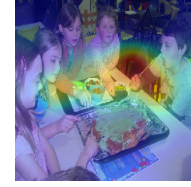

are they all eating cake ?  
A: yes  
GT: no

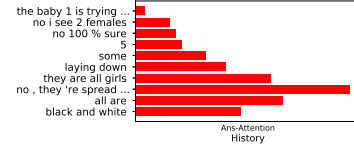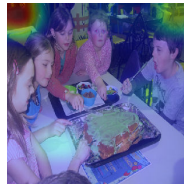

are they inside ?  
A: yes  
GT: yes

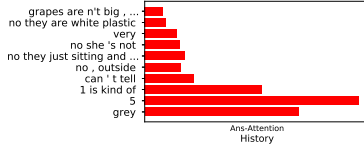

Q: is this a party ?  
A: maybe  
Q: are there lots of kids ?  
A: 5 kids  
Q: are they all eating cake ?  
A: no

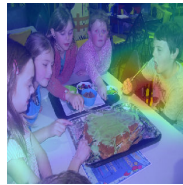

are they at a table ?  
A: yes  
GT: yes

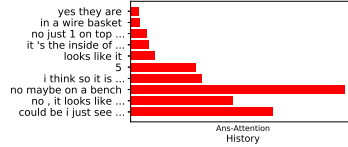

Q: is this a party ?  
A: maybe  
Q: are there lots of kids ?  
A: 5 kids  
Q: are they all eating cake ?  
A: no  
Q: are they inside ?  
A: yes

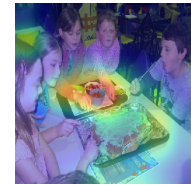

is the cake frosted ?  
A: yes  
GT: yes

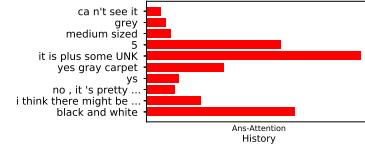

Q: is this a party ?  
A: maybe  
Q: are there lots of kids ?  
A: 5 kids  
Q: are they all eating cake ?  
A: no  
Q: are they inside ?  
A: yes  
Q: are they at a table ?  
A: yes

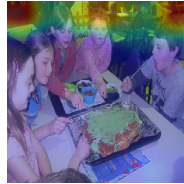

is this in a house ?  
A: yes  
GT: not sure

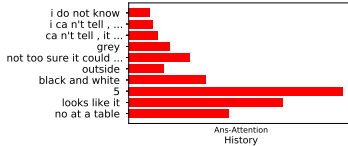

Q: is this a party ?  
A: maybe  
Q: are there lots of kids ?  
A: 5 kids  
Q: are they all eating cake ?  
A: no  
Q: are they inside ?  
A: yes  
Q: are they at a table ?  
A: yes  
Q: is the cake frosted ?  
A: yes

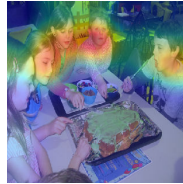

how old are the kids ?  
A: 5  
GT: 7 or 8

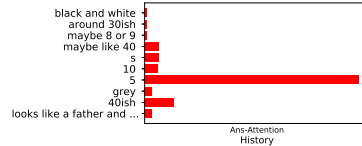

Q: is this a party ?  
A: maybe  
Q: are there lots of kids ?  
A: 5 kids  
Q: are they all eating cake ?  
A: no  
Q: are they inside ?  
A: yes  
Q: are they at a table ?  
A: yes  
Q: is the cake frosted ?  
A: yes  
Q: is this in a house ?  
A: not sure

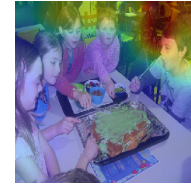

can you see chairs ?  
A: no  
GT: no

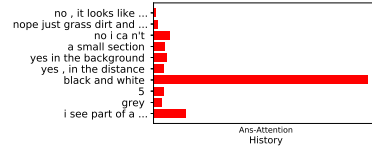

Q: is this a party ?  
A: maybe  
Q: are there lots of kids ?  
A: 5 kids  
Q: are they all eating cake ?  
A: no  
Q: are they inside ?  
A: yes  
Q: are they at a table ?  
A: yes  
Q: is the cake frosted ?  
A: yes  
Q: is this in a house ?  
A: not sure  
Q: how old are the kids ?  
A: 7 or 8

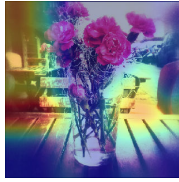

what room is the table in ?  
A: not sure maybe outside  
GT: not sure maybe outside

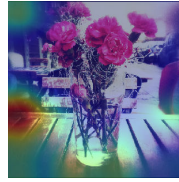

is there a tablecloth ?  
A: no  
GT: no its wood

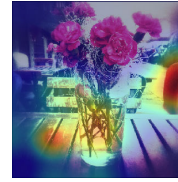

what color is the vase ?  
A: grey  
GT: clear

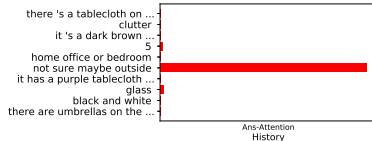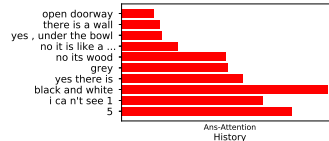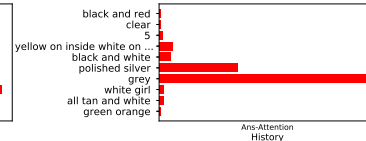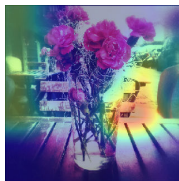

can you see any people ?  
A: no  
GT: no

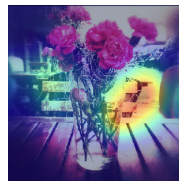

Q: is there any food or dishes on the table ?  
A: no but the table is different  
GT: no but the table is different

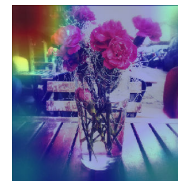

Q: can you see the floor or any walls ?  
A: yes  
GT: not really that is why i think it is outside

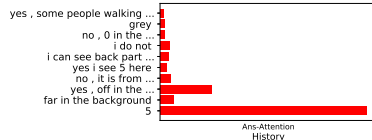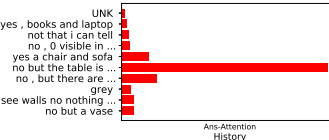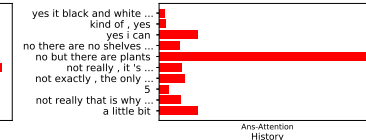

Q: what room is the table in ?  
A: not sure maybe outside  
Q: is there a tablecloth ?  
A: no its wood  
Q: what color is the vase ?  
A: clear  
Q: what kind of flowers ?  
A: carnations

Q: what room is the table in ?  
A: not sure maybe outside  
Q: is there a tablecloth ?  
A: no its wood  
Q: what color is the vase ?  
A: clear  
Q: what kind of flowers ?  
A: carnations  
Q: can you see any people ?  
A: no

Q: what room is the table in ?  
A: not sure maybe outside  
Q: is there a tablecloth ?  
A: no its wood  
Q: what color is the vase ?  
A: clear  
Q: what kind of flowers ?  
A: carnations  
Q: can you see any people ?  
A: no  
Q: is there any food or dishes on the table ?  
A: no but the table is different

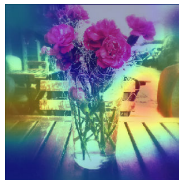

is there water in the vase ?  
A: yes  
GT: yes

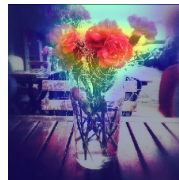

what color are the flowers ?  
A: pink, yellow and purple  
GT: pink

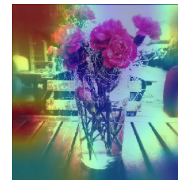

Q: is the vase tall and thin, or short and round ?  
A: large  
GT: short

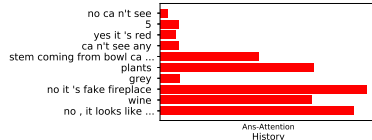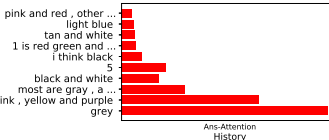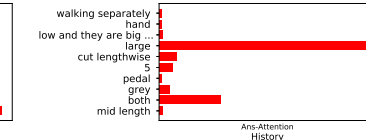

Q: what room is the table in ?  
A: not sure maybe outside  
Q: is there a tablecloth ?  
A: no its wood  
Q: what color is the vase ?  
A: clear  
Q: what kind of flowers ?  
A: carnations  
Q: can you see any people ?  
A: no  
Q: is there any food or dishes on the table ?  
A: no but the table is different  
Q: can you see the floor or any walls ?  
A: not really that is why i think it is outside

Q: what room is the table in ?  
A: not sure maybe outside  
Q: is there a tablecloth ?  
A: no its wood  
Q: what color is the vase ?  
A: clear  
Q: what kind of flowers ?  
A: carnations  
Q: can you see any people ?  
A: no  
Q: is there any food or dishes on the table ?  
A: no but the table is different  
Q: can you see the floor or any walls ?  
A: not really that is why i think it is outside  
Q: is there water in the vase ?  
A: yes

Q: what room is the table in ?  
A: not sure maybe outside  
Q: is there a tablecloth ?  
A: no its wood  
Q: what color is the vase ?  
A: clear  
Q: what kind of flowers ?  
A: carnations  
Q: can you see any people ?  
A: no  
Q: is there any food or dishes on the table ?  
A: no but the table is different  
Q: can you see the floor or any walls ?  
A: not really that is why i think it is outside  
Q: is there water in the vase ?  
A: yes  
Q: what color are the flowers ?  
A: pink

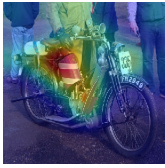

is the photo in color ?  
A: yes  
GT: yes

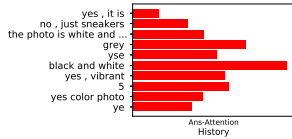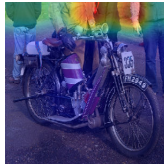

how many people do you see ?  
A: 5  
GT: 4

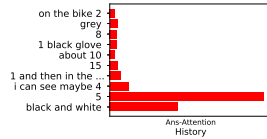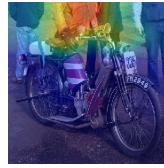

are they men or women ?  
A: i think they are all men but i can only see the bottom half of them  
GT: i think they are all men but i can only see the bottom half of them

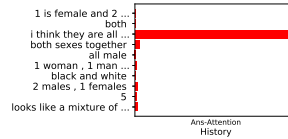

Q: is the photo in color ?  
A: yes

Q: is the photo in color ?  
A: yes  
Q: how many people do you see ?  
A: 4

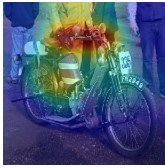

how many motorcycles ?  
A: more tires  
GT: just 1

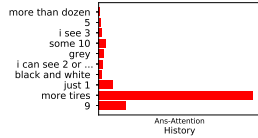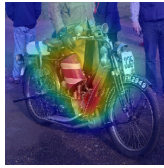

what color is it ?  
A: grey  
GT: purple mainly

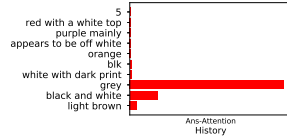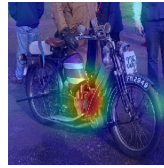

any other vehicles ?  
A: no just the 1 bike  
GT: no just the 1 bike

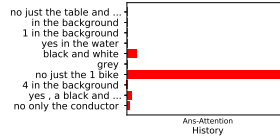

Q: is the photo in color ?  
A: yes  
Q: how many people do you see ?  
A: 4  
Q: are they men or women ?  
A: i think they are all men but i can only see the bottom half of them  
Q: are they men or women ?  
A: i think they are all men but i can only see the bottom half of them  
Q: how many motorcycles ?  
A: just 1  
Q: what color is it ?  
A: purple mainly

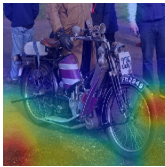

do you see any buildings ?  
A: no  
GT: no

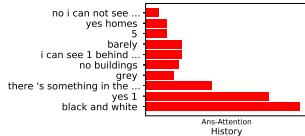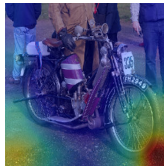

do you see the clouds ?  
A: i can not see the sky  
GT: i can not see the sky

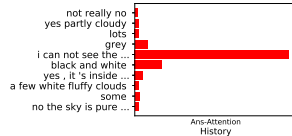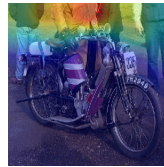

anyone wearing leather ?  
A: no  
GT: no

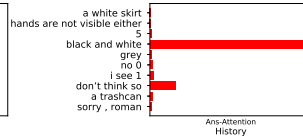

Q: is the photo in color ?  
A: yes  
Q: how many people do you see ?  
A: 4  
Q: are they men or women ?  
A: i think they are all men but i can only see the bottom half of them  
Q: how many motorcycles ?  
A: just 1  
Q: what color is it ?  
A: purple mainly  
Q: any other vehicles ?  
A: no just the 1 bike  
Q: do you see any buildings ?  
A: no  
Q: is it sunny ?  
A: yes  
Q: do you see the clouds ?  
A: i can not see the sky

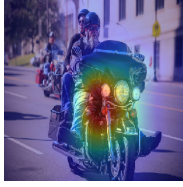

how many on the motorcycle ?  
A: 2  
GT: 2

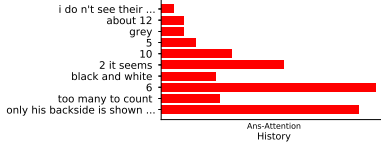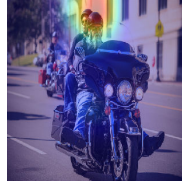

Q: does the riders have a helmet on ?  
A: yes  
GT: yes black

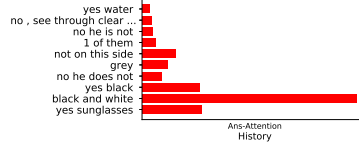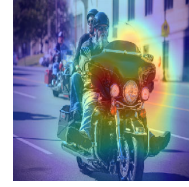

are they moving fast ?  
A: yes  
GT: i ca n't tell

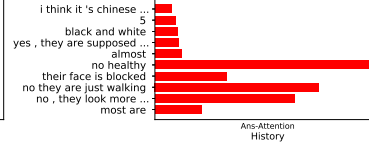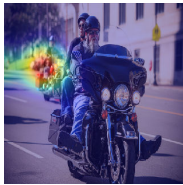

is it a busy street ?  
A: yes  
GT: no

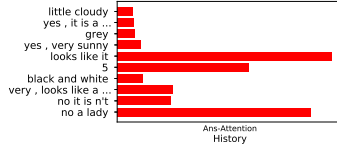

Q: how many on the motorcycle ?  
A: 2  
Q: does the riders have a helmet on ?  
A: yes black  
Q: are they moving fast ?  
A: i ca n't tell  
Q: are they wearing any leather ?  
A: no

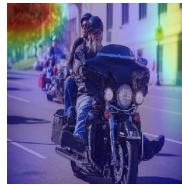

is it day or night ?  
A: day  
GT: daytime

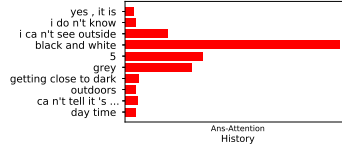

Q: how many on the motorcycle ?  
A: 2  
Q: does the riders have a helmet on ?  
A: yes black  
Q: are they moving fast ?  
A: i ca n't tell  
Q: are they wearing any leather ?  
A: no  
Q: is it a busy street ?  
A: no

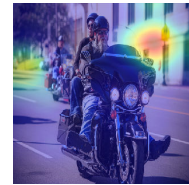

are there any street signs ?  
A: no  
GT: yes a pedestrian sign

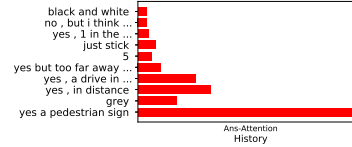

Q: how many on the motorcycle ?  
A: 2  
Q: does the riders have a helmet on ?  
A: yes black  
Q: are they moving fast ?  
A: i ca n't tell  
Q: are they wearing any leather ?  
A: no  
Q: is it a busy street ?  
A: no  
Q: is it day or night ?  
A: daytime

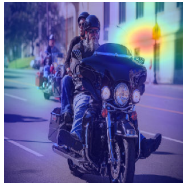

any traffic lights ?  
A: no  
GT: no

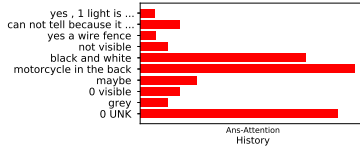

Q: how many on the motorcycle ?  
A: 2  
Q: does the riders have a helmet on ?  
A: yes black  
Q: are they moving fast ?  
A: i ca n't tell  
Q: are they wearing any leather ?  
A: no  
Q: is it a busy street ?  
A: no  
Q: is it day or night ?  
A: daytime  
Q: are there any street signs ?  
A: yes a pedestrian sign

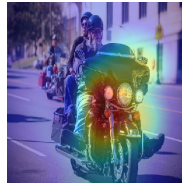

do you see a crosswalk ?  
A: no  
GT: no

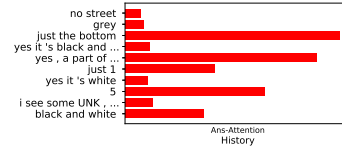

Q: how many on the motorcycle ?  
A: 2  
Q: does the riders have a helmet on ?  
A: yes black  
Q: are they moving fast ?  
A: i ca n't tell  
Q: are they wearing any leather ?  
A: no  
Q: is it a busy street ?  
A: no  
Q: is it day or night ?  
A: daytime  
Q: are there any street signs ?  
A: yes a pedestrian sign  
Q: any traffic lights ?  
A: no

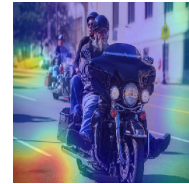

is it a paved street ?  
A: it looks like it  
GT: yes

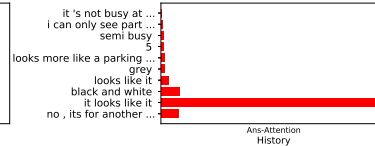

Q: how many on the motorcycle ?  
A: 2  
Q: does the riders have a helmet on ?  
A: yes black  
Q: are they moving fast ?  
A: i ca n't tell  
Q: are they wearing any leather ?  
A: no  
Q: is it a busy street ?  
A: no  
Q: is it day or night ?  
A: daytime  
Q: are there any street signs ?  
A: yes a pedestrian sign  
Q: any traffic lights ?  
A: no  
Q: do you see a crosswalk ?  
A: no



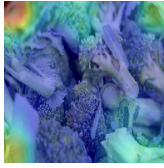

are they on a plate ?  
A: no  
GT: no

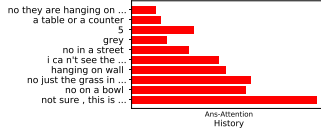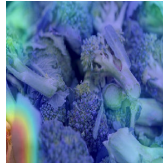

is the image in color ?  
A: yes  
GT: yes

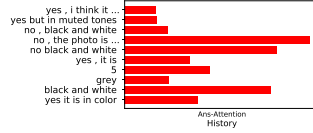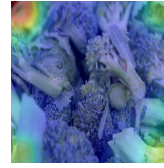

do you see any people ?  
A: no  
GT: no

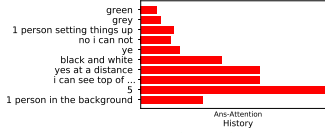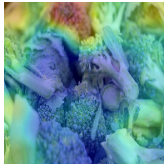

Q: is the broccoli sitting on a cutting board ?  
A: no  
GT: no

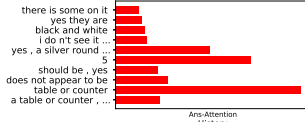

Q: are they on a plate ?  
A: no  
Q: are they cut into pieces , or are they on their original stalk ?  
A: cut  
Q: is the image in color ?  
A: yes  
Q: do you see any people ?  
A: no

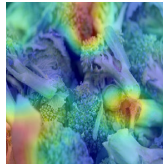

Q: is there any other food in the image ?  
A: no  
GT: no

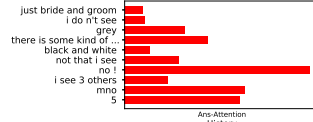

Q: are they on a plate ?  
A: no  
Q: are they cut into pieces , or are they on their original stalk ?  
A: cut  
Q: is the image in color ?  
A: yes  
Q: do you see any people ?  
A: no  
Q: is the broccoli sitting on a cutting board ?  
A: no

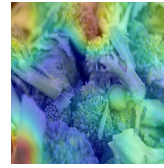

is this a close-up image ?  
A: yes  
GT: yes

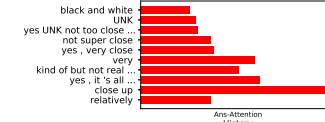

Q: are they on a plate ?  
A: no  
Q: are they cut into pieces , or are they on their original stalk ?  
A: cut  
Q: is the image in color ?  
A: yes  
Q: do you see any people ?  
A: no  
Q: is the broccoli sitting on a cutting board ?  
A: no  
Q: is there any other food in the image ?  
A: no

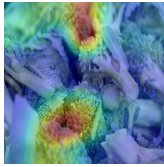

what is the broccoli sitting on ?  
A: nothing  
GT: i can not tell

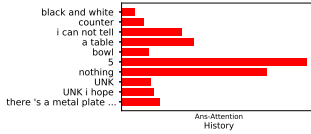

Q: are they on a plate ?  
A: no  
Q: are they cut into pieces , or are they on their original stalk ?  
A: cut  
Q: is the image in color ?  
A: yes  
Q: do you see any people ?  
A: no  
Q: is the broccoli sitting on a cutting board ?  
A: no  
Q: is there any other food in the image ?  
A: no  
Q: is this a close-up image ?  
A: yes

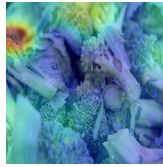

Q: what color is it behind the broccoli ?  
A: ca n't tell the picture is a close up of just broccoli  
GT: ca n't tell the picture is a close up of just broccoli

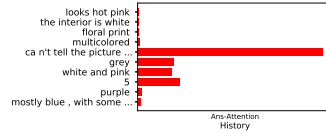

Q: are they on a plate ?  
A: no  
Q: are they cut into pieces , or are they on their original stalk ?  
A: cut  
Q: is the image in color ?  
A: yes  
Q: do you see any people ?  
A: no  
Q: is the broccoli sitting on a cutting board ?  
A: no  
Q: is there any other food in the image ?  
A: no  
Q: is this a close-up image ?  
A: yes  
Q: what is the broccoli sitting on ?  
A: i can not tell

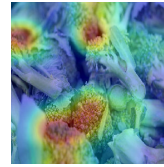

Q: does the broccoli appear to be fresh or cooked ?  
A: ca n't tell  
GT: it is raw looks okay

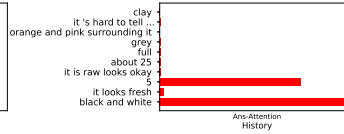

Q: are they on a plate ?  
A: no  
Q: are they cut into pieces , or are they on their original stalk ?  
A: cut  
Q: is the image in color ?  
A: yes  
Q: do you see any people ?  
A: no  
Q: is the broccoli sitting on a cutting board ?  
A: no  
Q: is there any other food in the image ?  
A: yes  
Q: what is the broccoli sitting on ?  
A: i can not tell  
Q: what color is it behind the broccoli ?  
A: ca n't tell the picture is a close up of just broccoli

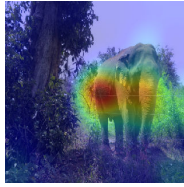

is it in color ?  
A: yes  
GT: yes

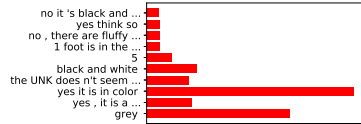

Ans-Attention History

Q: is the image clear ?

A: yes it is

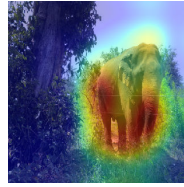

is there only 1 elephant ?  
A: yes  
GT: yes

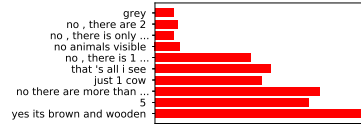

Ans-Attention History

Q: is the image clear ?

A: yes it is

Q: is it in color ?

A: yes

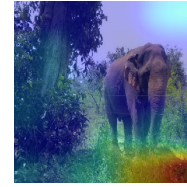

can you see any people ?  
A: no i can not  
GT: no i can not

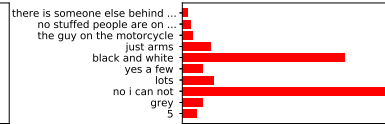

Ans-Attention History

Q: is the image clear ?

A: yes it is

Q: is it in color ?

A: yes

Q: is there only 1 elephant ?

A: yes

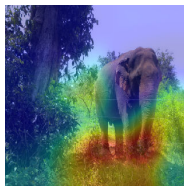

is the elephant eating anything ?  
A: not that i see  
GT: does not appear to be

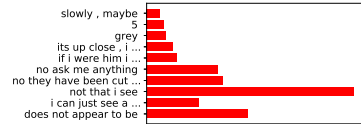

Ans-Attention History

Q: is the image clear ?

A: yes it is

Q: is it in color ?

A: yes

Q: is there only 1 elephant ?

A: yes

Q: can you see any people ?

A: no i can not

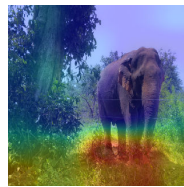

what color is the fence ?  
A: brown  
GT: UNK

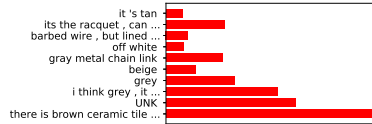

Ans-Attention History

Q: is the image clear ?

A: yes it is

Q: is it in color ?

A: yes

Q: is there only 1 elephant ?

A: yes

Q: can you see any people ?

A: no i can not

Q: is the elephant eating anything ?

A: does not appear to be

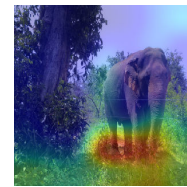

is it a metal fence ?  
A: yes it's a white gate  
GT: yes it is

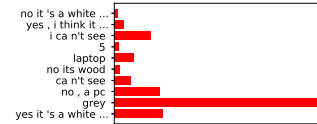

Ans-Attention History

Q: is the image clear ?

A: yes it is

Q: is it in color ?

A: yes

Q: is there only 1 elephant ?

A: yes

Q: can you see any people ?

A: no i can not

Q: is the elephant eating anything ?

A: does not appear to be

Q: what color is the fence ?

A: UNK

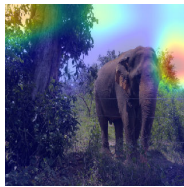

is it day or night ?  
A: day  
GT: day

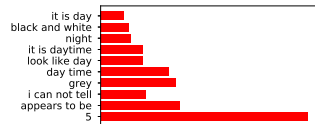

Ans-Attention History

Q: is the image clear ?

A: yes it is

Q: is it in color ?

A: yes

Q: is there only 1 elephant ?

A: yes

Q: can you see any people ?

A: no i can not

Q: is the elephant eating anything ?

A: does not appear to be

Q: what color is the fence ?

A: UNK

Q: is it a metal fence ?

A: yes it is

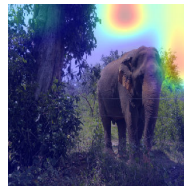

can you see the sun ?  
A: no i can not  
GT: no i can not

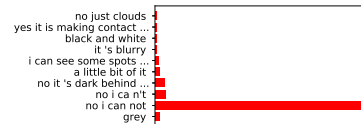

Ans-Attention History

Q: is the image clear ?

A: yes it is

Q: is it in color ?

A: yes

Q: is there only 1 elephant ?

A: yes

Q: can you see any people ?

A: no i can not

Q: is the elephant eating anything ?

A: does not appear to be

Q: what color is the fence ?

A: UNK

Q: is it a metal fence ?

A: yes it is

Q: is it day or night ?

A: day

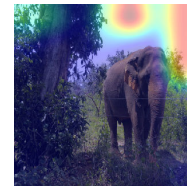

do you see any clouds ?  
A: no  
GT: i do not see any clouds

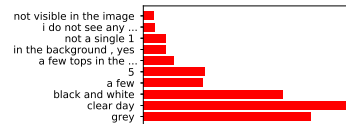

Ans-Attention History

Q: is the image clear ?

A: yes it is

Q: is it in color ?

A: yes

Q: is there only 1 elephant ?

A: yes

Q: can you see any people ?

A: no i can not

Q: is the elephant eating anything ?

A: does not appear to be

Q: what color is the fence ?

A: UNK

Q: is it a metal fence ?

A: yes it is

Q: is it day or night ?

A: day

Q: can you see the sun ?

A: no i can not

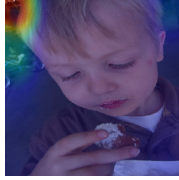

Q: are there any other people besides boy ?  
A: no  
GT: no

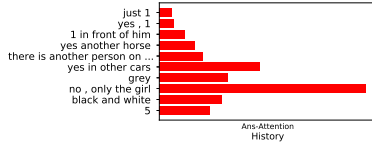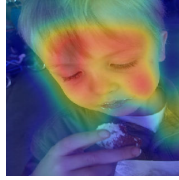

how old does boy look ?  
A: about 4  
GT: 5

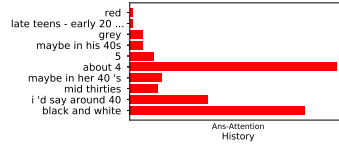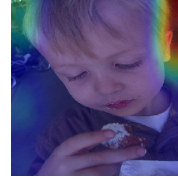

is picture indoors ?  
A: yes  
GT: hard to tell

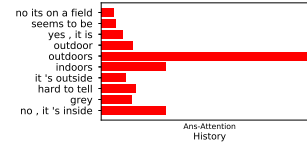

Q: are there any other people besides boy ?  
A: no  
Q: how old does boy look ?  
A: 5

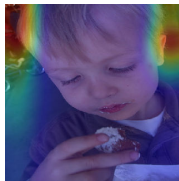

is there any furniture in picture ?  
A: no  
GT: no

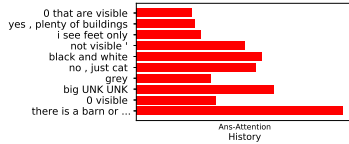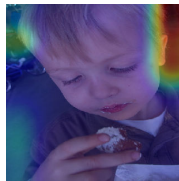

can you see any walls ?  
A: no it is pretty close up  
GT: no it is pretty close up

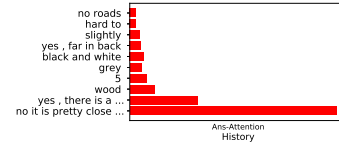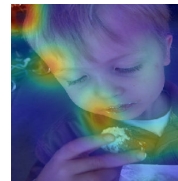

Q: can you see boy's whole body ?  
A: yes  
GT: no

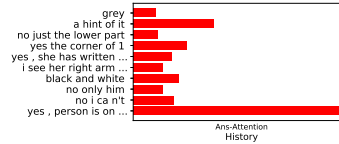

Q: are there any other people besides boy ?  
A: no  
Q: how old does boy look ?  
A: 5  
Q: is picture indoors ?  
A: hard to tell

Q: are there any other people besides boy ?  
A: no  
Q: how old does boy look ?  
A: 5  
Q: is picture indoors ?  
A: hard to tell  
Q: is there any furniture in picture ?  
A: no

Q: are there any other people besides boy ?  
A: no  
Q: how old does boy look ?  
A: 5  
Q: is picture indoors ?  
A: hard to tell  
Q: is there any furniture in picture ?  
A: no  
Q: can you see any walls ?  
A: no it is pretty close up

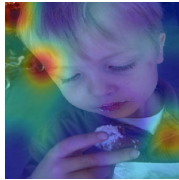

Q: can you see his legs at all ?  
A: yes  
GT: no about chest up

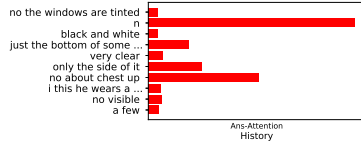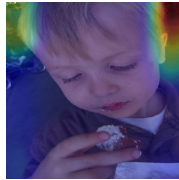

is there anything in background ?  
A: yes  
GT: i can only see some sort of wheel

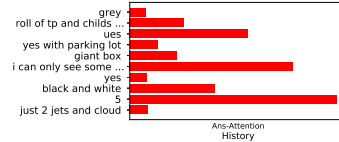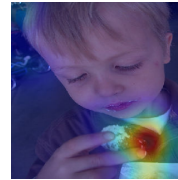

what color is wheel ?  
A: white  
GT: black

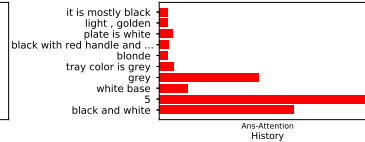

Q: are there any other people besides boy ?  
A: no  
Q: how old does boy look ?  
A: 5  
Q: is picture indoors ?  
A: hard to tell  
Q: is there any furniture in picture ?  
A: no  
Q: can you see any walls ?  
A: no it is pretty close up  
Q: can you see boy's whole body ?  
A: no

Q: are there any other people besides boy ?  
A: no  
Q: how old does boy look ?  
A: 5  
Q: is picture indoors ?  
A: hard to tell  
Q: is there any furniture in picture ?  
A: no  
Q: can you see any walls ?  
A: no it is pretty close up  
Q: can you see boy's whole body ?  
A: no  
Q: can you see his legs at all ?  
A: no about chest up

Q: are there any other people besides boy ?  
A: no  
Q: how old does boy look ?  
A: 5  
Q: is picture indoors ?  
A: hard to tell  
Q: is there any furniture in picture ?  
A: no  
Q: can you see any walls ?  
A: no it is pretty close up  
Q: can you see boy's whole body ?  
A: no  
Q: can you see his legs at all ?  
A: no about chest up  
Q: is there anything in background ?  
A: i can only see some sort of wheel  
Q: does it have spokes ?  
A: yes

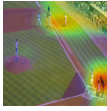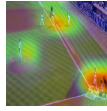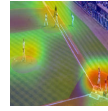

Q: how many people ?  
A: 5  
GT: there are 8 people on the field , and several in the crowd

Q: are they ball players ?  
A: on the field , yes  
GT: on the field , yes

Q: do you see both teams or only 1 ?  
A: 5  
GT: there are 2 teams on the field

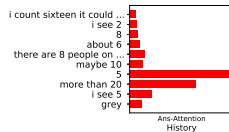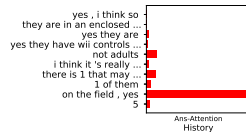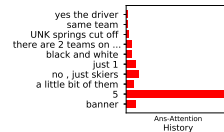

Q: how many people ?

A: there are 8 people on the field ,and several in the crowd

Q: how many people ?  
A: there are 8 people on the field ,and several in the crowd  
Q: are they ball players ?  
A: on the field ,yes

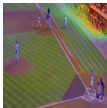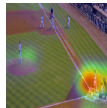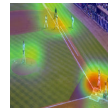

Q: do you see any stands ?  
A: no  
GT: yes

Q: what colors are the 2 different uniforms ?  
A: black and white  
GT: they are both white the only difference is their hats 1 is red 1 is blue , i think

Q: are these men playing ball ?  
A: neither

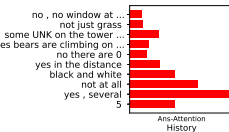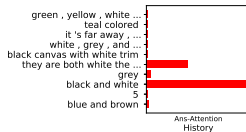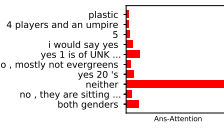

Q: how many people ?  
A: there are 8 people on the field ,and several in the crowd  
Q: are they ball players ?  
A: on the field ,yes  
Q: do you see both teams or only 1 ?  
A: yes  
Q: do you see any stands ?  
A: there are 2 teams on the field

Q: how many people ?  
A: there are 8 people on the field ,and several in the crowd  
Q: are they ball players ?  
A: on the field ,yes  
Q: do you see both teams or only 1 ?  
A: there are 2 teams on the field  
Q: do you see any stands ?  
A: yes  
Q: do you see a scoreboard ?  
A: no

Q: how many people ?  
A: there are 8 people on the field ,and several in the crowd  
Q: are they ball players ?  
A: on the field ,yes  
Q: do you see both teams or only 1 ?  
A: there are 2 teams on the field  
Q: do you see any stands ?  
A: yes  
Q: do you see a scoreboard ?  
A: no  
Q: what colors are the 2 different uniforms ?

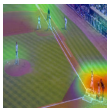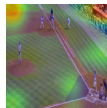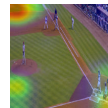

Q: is this a professional game ?  
A: yes  
GT: yes , definitely

Q: is it daytime ?  
A: yes  
GT: yes

Q: what is the weather like  
A: the spectators in warm weather clothes ?  
A: i ca n't tell what they are wearing , but it 's sunny and bright  
GT: i ca n't tell what they are wearing , but it 's sunny and bright

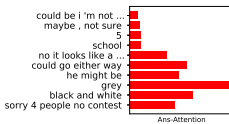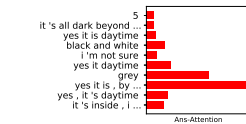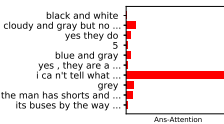

Q: how many people ?  
A: there are 8 people on the field ,and several in the crowd  
Q: are they ball players ?  
A: on the field ,yes  
Q: do you see both teams or only 1 ?  
A: there are 2 teams on the field  
Q: do you see any stands ?  
A: yes  
Q: do you see a scoreboard ?  
A: no  
Q: what colors are the 2 different uniforms ?

Q: how many people ?  
A: there are 8 people on the field ,and several in the crowd  
Q: are they ball players ?  
A: on the field ,yes  
Q: do you see both teams or only 1 ?  
A: there are 2 teams on the field  
Q: do you see any stands ?  
A: yes  
Q: do you see a scoreboard ?  
A: no  
Q: what colors are the 2 different uniforms ?

Q: how many people ?  
A: there are 8 people on the field ,and several in the crowd  
Q: are they ball players ?  
A: on the field ,yes  
Q: do you see both teams or only 1 ?  
A: there are 2 teams on the field  
Q: do you see any stands ?  
A: yes  
Q: do you see a scoreboard ?  
A: no  
Q: what colors are the 2 different uniforms ?

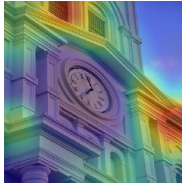

what color is the building ?  
A: grey  
GT: white stone

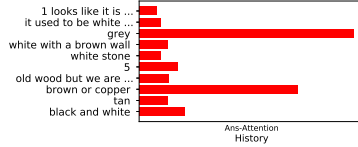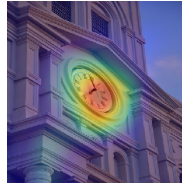

what time does the clock say ?  
A: i think 8:20  
GT: UNK

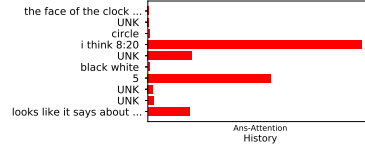

Q: what color is the building ?  
A: white stone  
Q: what color is the clock ?  
A: white

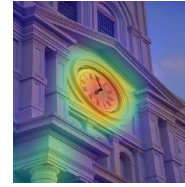

Q: is it a digital or analog clock ?  
A: analog  
GT: analog

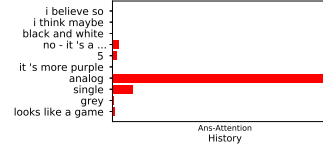

Q: what color is the building ?  
A: white stone  
Q: what color is the clock ?  
A: white  
Q: what time does the clock say ?  
A: UNK

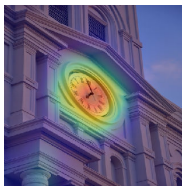

what color are the numbers ?  
A: black  
GT: black

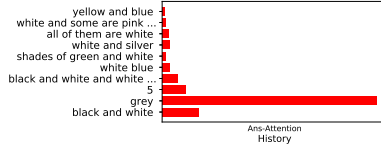

Q: what color is the building ?  
A: white stone  
Q: what color is the clock ?  
A: white  
Q: what time does the clock say ?  
A: UNK  
Q: is it a digital or analog clock ?  
A: analog

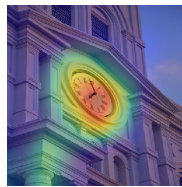

are all of the numbers visible ?  
A: yes  
GT: yes

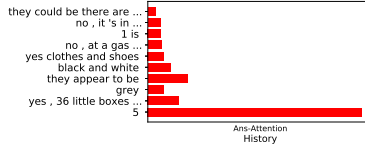

Q: what color is the building ?  
A: white stone  
Q: what color is the clock ?  
A: white  
Q: what time does the clock say ?  
A: UNK  
Q: is it a digital or analog clock ?  
A: analog  
Q: what color are the numbers ?  
A: black

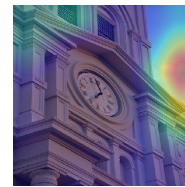

is it an outdoor view ?  
A: yes  
GT: yes

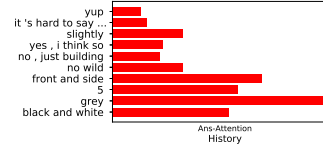

Q: what color is the building ?  
A: white stone  
Q: what color is the clock ?  
A: white  
Q: what time does the clock say ?  
A: UNK  
Q: is it a digital or analog clock ?  
A: analog  
Q: what color are the numbers ?  
A: black  
Q: are all of the numbers visible ?  
A: yes

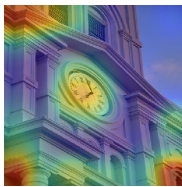

Q: are there any people in the image ?  
A: no  
GT: no

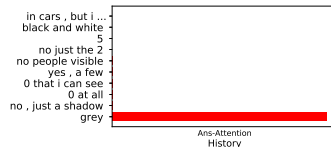

Q: what color is the building ?  
A: white stone  
Q: what color is the clock ?  
A: white  
Q: what time does the clock say ?  
A: UNK  
Q: is it a digital or analog clock ?  
A: analog  
Q: what color are the numbers ?  
A: black  
Q: are all of the numbers visible ?  
A: yes  
Q: is it an outdoor view ?  
A: yes

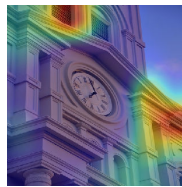

can you see any other buildings ?  
A: no  
GT: no

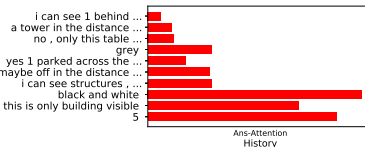

Q: what color is the building ?  
A: white stone  
Q: what color is the clock ?  
A: white  
Q: what time does the clock say ?  
A: UNK  
Q: is it a digital or analog clock ?  
A: analog  
Q: what color are the numbers ?  
A: black  
Q: are all of the numbers visible ?  
A: yes  
Q: is it an outdoor view ?  
A: yes  
Q: are there any people in the image ?  
A: no

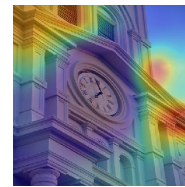

are there any trees ?  
A: no  
GT: no

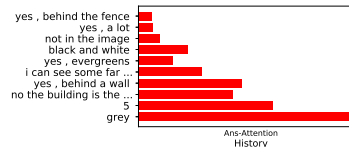

Q: what color is the building ?  
A: white stone  
Q: what color is the clock ?  
A: white  
Q: what time does the clock say ?  
A: UNK  
Q: is it a digital or analog clock ?  
A: analog  
Q: what color are the numbers ?  
A: black  
Q: are all of the numbers visible ?  
A: yes  
Q: is it an outdoor view ?  
A: yes  
Q: are there any people in the image ?  
A: no  
Q: can you see any other buildings ?  
A: no



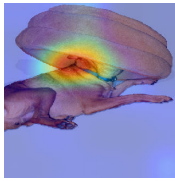

Q: is the dog 's head  
completely covered ?  
A: yes  
GT: pretty much so

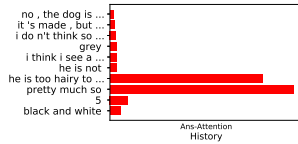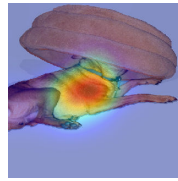

what color is the dog ?  
A: brown  
GT: golden

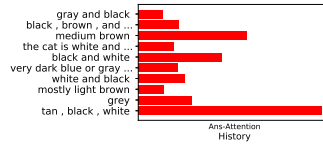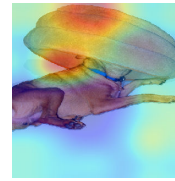

Q: can you see the dog  
's tail ?  
A: no , not his tail  
GT: no , not his tail

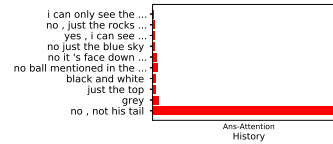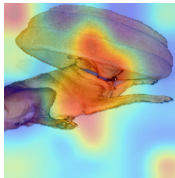

Q: what color is the dog  
's bed ?  
A: it is a beige color  
GT: it is a beige color

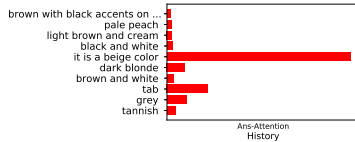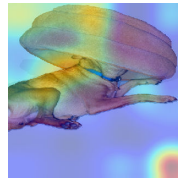

Q: is the dog laying on  
the floor ?  
A: yes , he is on the floor  
GT: yes , he is on the floor

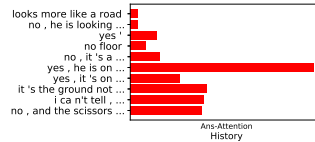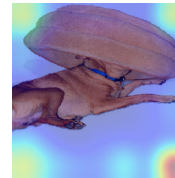

what color is the floor ?  
A: white  
GT: it 's a light blue flat surface

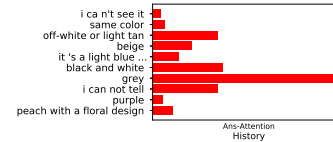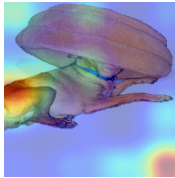

can you see any people ?  
A: no people around  
GT: no people around

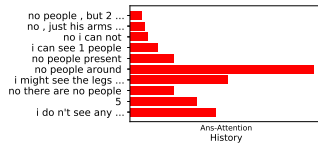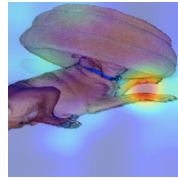

any other animals ?  
A: no other animals in view  
GT: no other animals in view

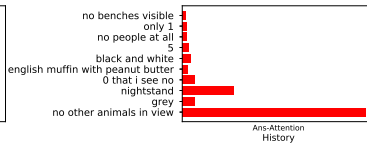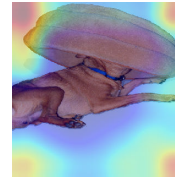

Q: can you tell what room  
in the house the dog is in ?  
A: no  
GT: no , looks like a set for photography

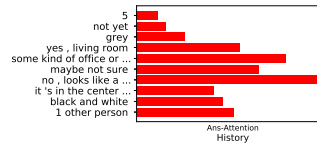

Q: is the dog 's head completely covered ?  
A: pretty much so  
Q: what color is the dog ?  
A: golden  
Q: can you see the dog 's tail ?  
A: no , not his tail  
Q: what color is the dog 's bed ?  
A: it is a beige color  
Q: is the dog laying on the floor ?  
A: yes , he is on the floor  
Q: is the floor carpeted ?  
A: it does n't look like it  
Q: what color is the floor ?  
A: it 's a light blue flat surface

Q: is the dog 's head completely covered ?  
A: pretty much so  
Q: what color is the dog ?  
A: golden  
Q: can you see the dog 's tail ?  
A: no , not his tail  
Q: what color is the dog 's bed ?  
A: it is a beige color  
Q: is the dog laying on the floor ?  
A: yes , he is on the floor  
Q: is the floor carpeted ?  
A: it does n't look like it  
Q: what color is the floor ?  
A: it 's a light blue flat surface  
Q: can you see any people ?  
A: no people around

Q: is the dog 's head completely covered ?  
A: pretty much so  
Q: what color is the dog ?  
A: golden  
Q: can you see the dog 's tail ?  
A: no , not his tail  
Q: what color is the dog 's bed ?  
A: it is a beige color  
Q: is the dog laying on the floor ?  
A: yes , he is on the floor  
Q: is the floor carpeted ?  
A: it does n't look like it  
Q: what color is the floor ?  
A: it 's a light blue flat surface  
Q: can you see any people ?  
A: no people around  
Q: any other animals ?  
A: no other animals in view

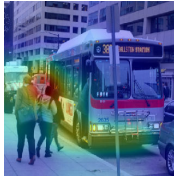

how many passengers ?  
A: 5  
GT: 4 people near the bus

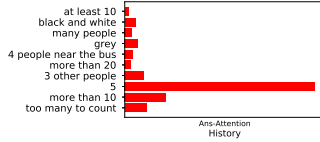

Q: what color is the bus ?  
A: red and white

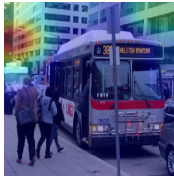

do you see any buildings ?  
A: yes  
GT: yes

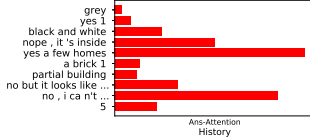

Q: what color is the bus ?  
A: red and white  
Q: how many passengers ?  
A: 4 people near the bus  
Q: is it a party bus ?  
A: no  
Q: is it a city bus ?  
A: yes

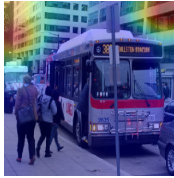

what color are the buildings ?  
A: grey  
GT: white

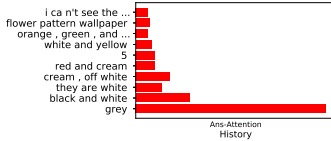

Q: what color is the bus ?  
A: red and white  
Q: how many passengers ?  
A: 4 people near the bus  
Q: is it a party bus ?  
A: no  
Q: is it a city bus ?  
A: yes  
Q: do you see any buildings ?  
A: yes  
Q: do you see any trees ?  
A: no  
Q: do you see any stop signs ?  
A: no

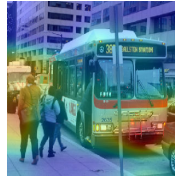

is it a party bus ?  
A: no  
GT: no

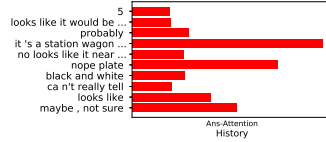

Q: what color is the bus ?  
A: red and white  
Q: how many passengers ?  
A: 4 people near the bus

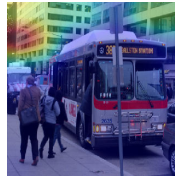

do you see any trees ?  
A: no  
GT: no

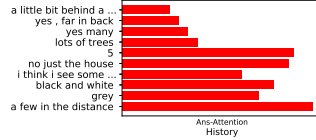

Q: what color is the bus ?  
A: red and white  
Q: how many passengers ?  
A: 4 people near the bus  
Q: is it a party bus ?  
A: no  
Q: is it a city bus ?  
A: yes  
Q: do you see any buildings ?  
A: yes

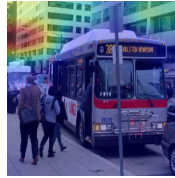

any windows ?  
A: yes  
GT: yes

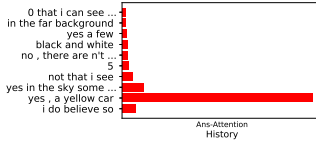

Q: what color is the bus ?  
A: red and white  
Q: how many passengers ?  
A: 4 people near the bus  
Q: is it a party bus ?  
A: no  
Q: is it a city bus ?  
A: yes  
Q: do you see any buildings ?  
A: yes  
Q: do you see any trees ?  
A: no  
Q: do you see any stop signs ?  
A: no  
Q: what color are the buildings ?  
A: white

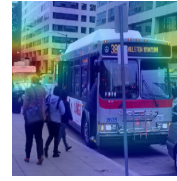

is it a city bus ?  
A: yes, looks like it  
GT: yes

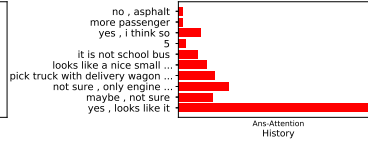

Q: what color is the bus ?  
A: red and white  
Q: how many passengers ?  
A: 4 people near the bus  
Q: is it a party bus ?  
A: no

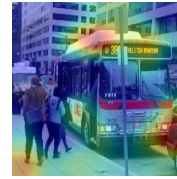

do you see any stop signs ?  
A: no  
GT: no

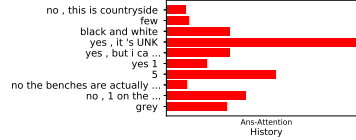

Q: what color is the bus ?  
A: red and white  
Q: how many passengers ?  
A: 4 people near the bus  
Q: is it a party bus ?  
A: no  
Q: is it a city bus ?  
A: yes  
Q: do you see any buildings ?  
A: yes  
Q: do you see any trees ?  
A: no

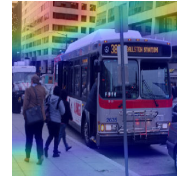

what is the weather ?  
A: maybe cloudy, i ca n't see the sky through  
GT: i ca n't tell

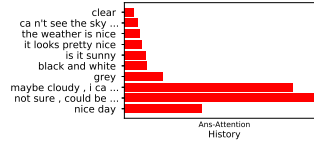

Q: what color is the bus ?  
A: red and white  
Q: how many passengers ?  
A: 4 people near the bus  
Q: is it a party bus ?  
A: no  
Q: is it a city bus ?  
A: yes  
Q: do you see any buildings ?  
A: yes  
Q: do you see any trees ?  
A: no  
Q: do you see any stop signs ?  
A: no  
Q: what color are the buildings ?  
A: white  
Q: any windows ?  
A: yes

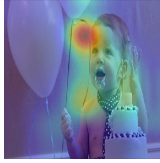

how old is baby ?  
A: maybe 2  
GT: i'd say first birthday

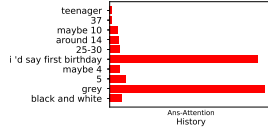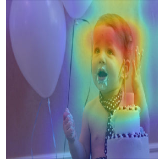

is it a boy ?  
A: yes  
GT: yep

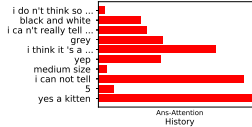

Q: how old is baby ?  
A: i'd say first birthday

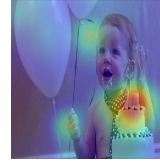

any candles on cake ?  
A: no  
GT: just a large `` number 1 ``

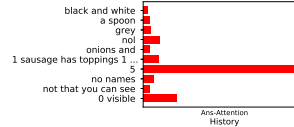

Q: how old is baby ?  
A: i'd say first birthday  
Q: is it a boy ?  
A: yep  
Q: what color balloons ?  
A: white

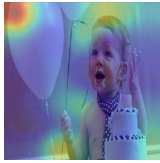

do you see other people ?  
A: no  
GT: no

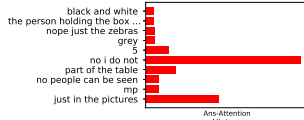

Q: how old is baby ?  
A: i'd say first birthday  
Q: is it a boy ?  
A: yep  
Q: what color balloons ?  
A: white  
Q: any candles on cake ?  
A: just a large `` number 1 ``

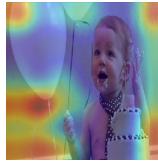

is it inside ?  
A: yes  
GT: i'm not sure , it's a tight shot

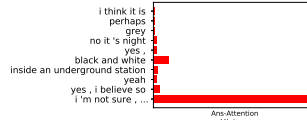

Q: how old is baby ?  
A: i'd say first birthday  
Q: is it a boy ?  
A: yep  
Q: what color balloons ?  
A: white  
Q: any candles on cake ?  
A: just a large `` number 1 ``  
Q: do you see other people ?  
A: no

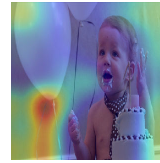

do you see windows ?  
A: no  
GT: no

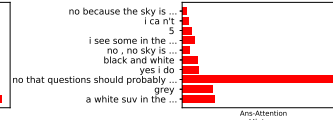

Q: how old is baby ?  
A: i'd say first birthday  
Q: is it a boy ?  
A: yep  
Q: what color balloons ?  
A: white  
Q: any candles on cake ?  
A: just a large `` number 1 ``  
Q: do you see other people ?  
A: no  
Q: is it inside ?  
A: i'm not sure , it's a tight shot

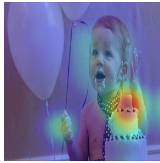

what color icing ?  
A: white  
GT: white has some brown and white `` beads `` around it

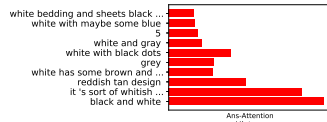

Q: how old is baby ?  
A: i'd say first birthday  
Q: is it a boy ?  
A: yep  
Q: what color balloons ?  
A: white  
Q: any candles on cake ?  
A: just a large `` number 1 ``  
Q: do you see other people ?  
A: no  
Q: is it inside ?  
A: i'm not sure , it's a tight shot  
Q: do you see windows ?  
A: no

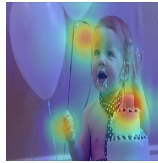

is the cake cut ?  
A: no  
GT: no , but the boy has sure had his hands in it !

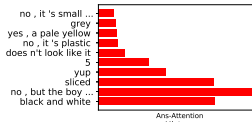

Q: how old is baby ?  
A: i'd say first birthday  
Q: is it a boy ?  
A: yep  
Q: what color balloons ?  
A: white  
Q: any candles on cake ?  
A: just a large `` number 1 ``  
Q: do you see other people ?  
A: no  
Q: is it inside ?  
A: i'm not sure , it's a tight shot  
Q: do you see windows ?  
A: no  
Q: what color icing ?  
A: white has some brown and white `` beads `` around it

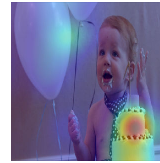

what color tie or bib ?  
A: white  
GT: the tie is brown and white dotted

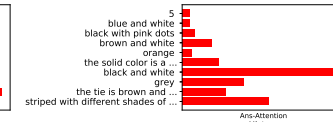

Q: how old is baby ?  
A: i'd say first birthday  
Q: is it a boy ?  
A: yep  
Q: what color balloons ?  
A: white  
Q: any candles on cake ?  
A: just a large `` number 1 ``  
Q: do you see other people ?  
A: no  
Q: is it inside ?  
A: i'm not sure , it's a tight shot  
Q: do you see windows ?  
A: no  
Q: what color icing ?  
A: white has some brown and white `` beads `` around it  
Q: is the cake cut ?  
A: no , but the boy has sure had his hands in it !

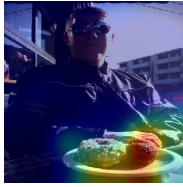

is the image color ?  
A: yes  
GT: yes

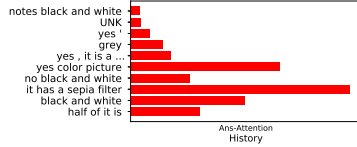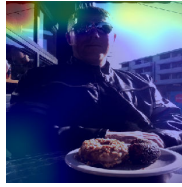

is it sunny ?  
A: yes  
GT: yes

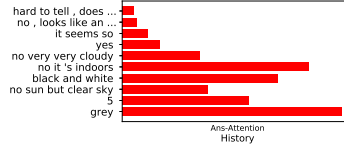

Q: is the image color ?  
A: yes  
Q: is it daytime ?  
A: yes

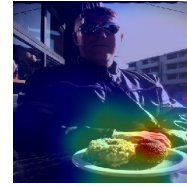

how many donuts on the plate ?  
A: 4  
GT: 2

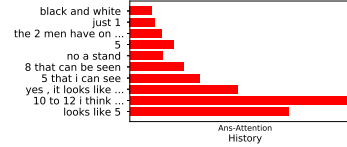

Q: is the image color ?  
A: yes  
Q: is it daytime ?  
A: yes  
Q: is it sunny ?  
A: yes

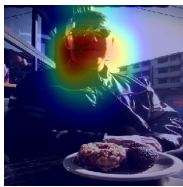

how old is the man ?  
A: about early 30s  
GT: about early 30s

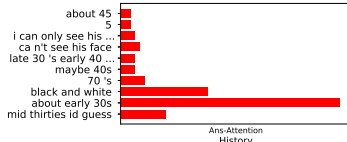

Q: is the image color ?  
A: yes  
Q: is it daytime ?  
A: yes  
Q: is it sunny ?  
A: yes  
Q: how many donuts on the plate ?  
A: 2

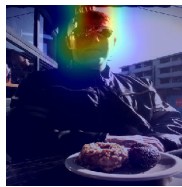

what color hair ?  
A: black  
GT: brown

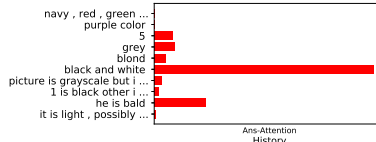

Q: is the image color ?  
A: yes  
Q: is it daytime ?  
A: yes  
Q: is it sunny ?  
A: yes  
Q: how many donuts on the plate ?  
A: 2  
Q: how old is the man ?  
A: about early 30s

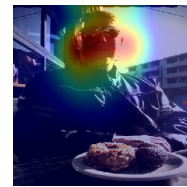

does he have any facial hair ?  
A: no  
GT: no

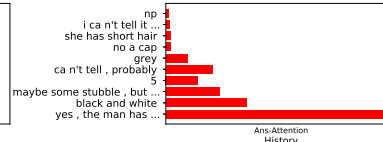

Q: is the image color ?  
A: yes  
Q: is it daytime ?  
A: yes  
Q: is it sunny ?  
A: yes  
Q: how many donuts on the plate ?  
A: 2  
Q: how old is the man ?  
A: about early 30s  
Q: what color hair ?  
A: brown

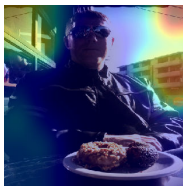

is he indoors ?  
A: yes  
GT: yes

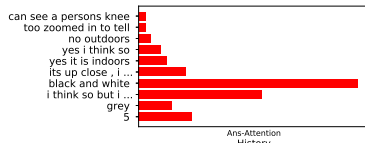

Q: is the image color ?  
A: yes  
Q: is it daytime ?  
A: yes  
Q: is it sunny ?  
A: yes  
Q: how many donuts on the plate ?  
A: 2  
Q: how old is the man ?  
A: about early 30s  
Q: what color hair ?  
A: brown  
Q: does he have any facial hair ?  
A: no

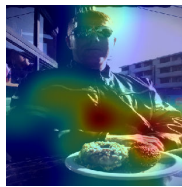

are any of the donuts eaten ?  
A: no  
GT: yes

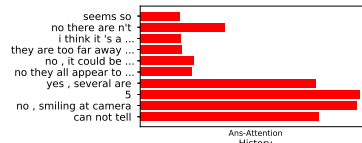

Q: is the image color ?  
A: yes  
Q: is it daytime ?  
A: yes  
Q: is it sunny ?  
A: yes  
Q: how many donuts on the plate ?  
A: 2  
Q: how old is the man ?  
A: about early 30s  
Q: what color hair ?  
A: brown  
Q: does he have any facial hair ?  
A: no  
Q: is he indoors ?  
A: yes

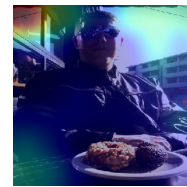

is it bright ?  
A: yes  
GT: yes

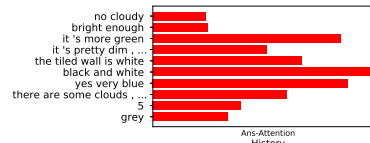

Q: is the image color ?  
A: yes  
Q: is it daytime ?  
A: yes  
Q: is it sunny ?  
A: yes  
Q: how many donuts on the plate ?  
A: 2  
Q: how old is the man ?  
A: about early 30s  
Q: what color hair ?  
A: brown  
Q: does he have any facial hair ?  
A: no  
Q: is he indoors ?  
A: yes  
Q: are any of the donuts eaten ?  
A: yes

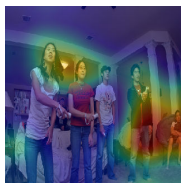

how many people ?  
A: 5  
GT: about 10

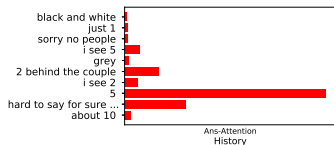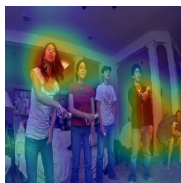

are they male or female ?  
A: both  
GT: both

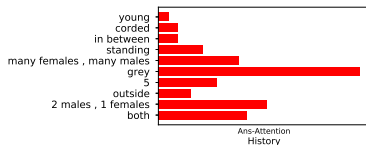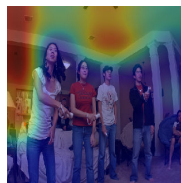

is this indoors ?  
A: yes in a home  
GT: yes in a home

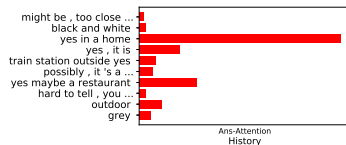

Q: how many people ?  
A: about 10  
Q: are they male or female ?  
A: both

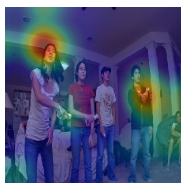

what color are the controllers ?  
A: white  
GT: white

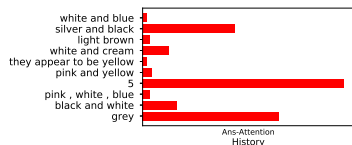

Q: how many people ?  
A: about 10  
Q: are they male or female ?  
A: both  
Q: is this indoors ?  
A: yes in a home

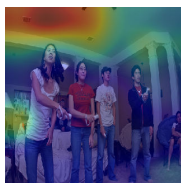

can you see the tv ?  
A: no  
GT: no

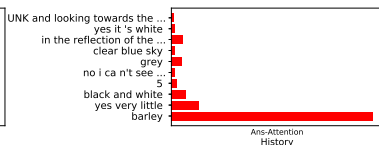

Q: how many people ?  
A: about 10  
Q: are they male or female ?  
A: both  
Q: is this indoors ?  
A: yes in a home  
Q: what color are the controllers ?  
A: white

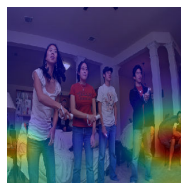

are they standing or sitting ?  
A: 2 are sitting 1 is standing  
GT: standing

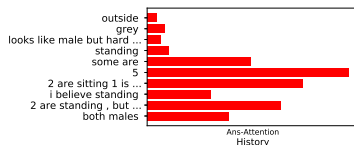

Q: how many people ?  
A: about 10  
Q: are they male or female ?  
A: both  
Q: is this indoors ?  
A: yes in a home  
Q: what color are the controllers ?  
A: white  
Q: can you see the tv ?  
A: no

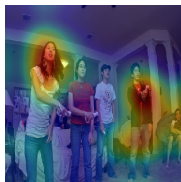

how old are they ?  
A: maybe teens  
GT: maybe teens

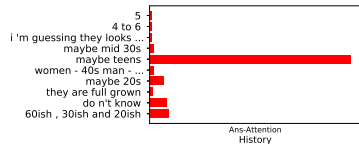

Q: how many people ?  
A: about 10  
Q: are they male or female ?  
A: both  
Q: is this indoors ?  
A: yes in a home  
Q: what color are the controllers ?  
A: white  
Q: can you see the tv ?  
A: no  
Q: are they standing or sitting ?  
A: standing

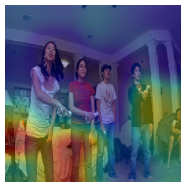

are there any snacks ?  
A: no  
GT: no

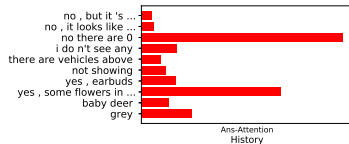

Q: how many people ?  
A: about 10  
Q: are they male or female ?  
A: both  
Q: is this indoors ?  
A: yes in a home  
Q: what color are the controllers ?  
A: white  
Q: can you see the tv ?  
A: no  
Q: are they standing or sitting ?  
A: standing  
Q: how old are they ?  
A: maybe teens

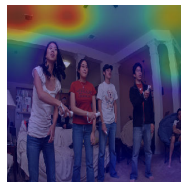

is the room well lit ?  
A: yes  
GT: yes

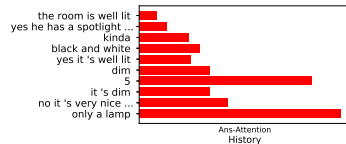

Q: how many people ?  
A: about 10  
Q: are they male or female ?  
A: both  
Q: is this indoors ?  
A: yes in a home  
Q: what color are the controllers ?  
A: white  
Q: can you see the tv ?  
A: no  
Q: are they standing or sitting ?  
A: standing  
Q: how old are they ?  
A: maybe teens  
Q: are there any snacks ?  
A: no  
Q: are any of them looking at the camera ?  
A: no



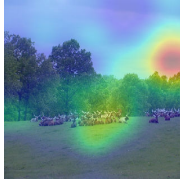

do you see a barn ?

A: no

GT: no

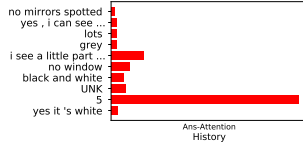

Q: how many bulls are in the photo ?

A: more than 30

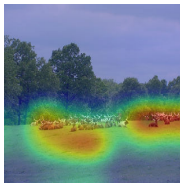

do you see people ?

A: no

GT: no

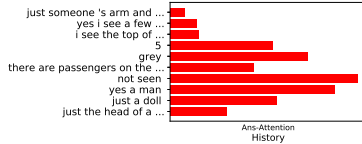

Q: how many bulls are in the photo ?

A: more than 30

Q: do you see a barn ?

A: no

Q: what color are the bulls ?

A: most of them appear to be brown

Q: are there any other animals ?

A: no

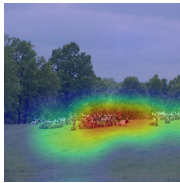

do they all have horns ?

A: yes

GT: it appears they all do

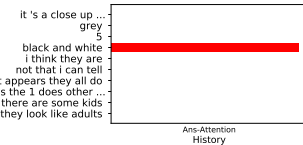

Q: how many bulls are in the photo ?

A: more than 30

Q: do you see a barn ?

A: no

Q: what color are the bulls ?

A: most of them appear to be brown

Q: are there any other animals ?

A: no

Q: do you see people ?

A: no

Q: do you see any buildings ?

A: no

Q: are the bulls eating ?

A: no

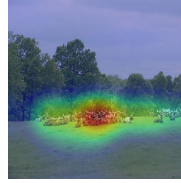

what color are the bulls ?

A: most of them appear to be brown

GT: most of them appear to be brown

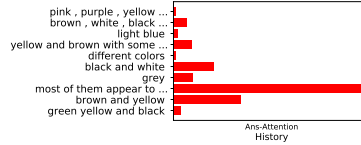

Q: how many bulls are in the photo ?

A: more than 30

Q: do you see a barn ?

A: no

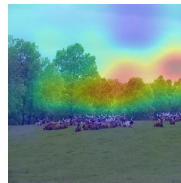

do you see any buildings ?

A: no

GT: no

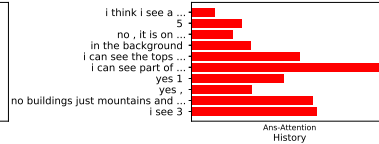

Q: how many bulls are in the photo ?

A: more than 30

Q: do you see a barn ?

A: no

Q: what color are the bulls ?

A: most of them appear to be brown

Q: are there any other animals ?

A: no

Q: do you see people ?

A: no

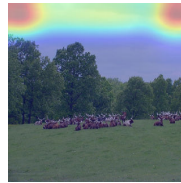

is it sunny ?

A: yes

GT: yes

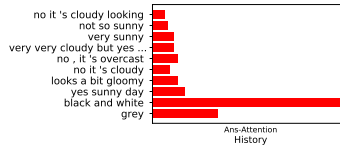

Q: how many bulls are in the photo ?

A: more than 30

Q: do you see a barn ?

A: no

Q: what color are the bulls ?

A: most of them appear to be brown

Q: are there any other animals ?

A: no

Q: do you see people ?

A: no

Q: do you see any buildings ?

A: no

Q: are the bulls eating ?

A: no

Q: do they all have horns ?

A: it appears they all do

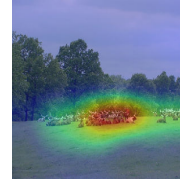

are there any other animals ?

A: no

GT: no

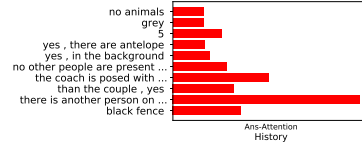

Q: how many bulls are in the photo ?

A: more than 30

Q: do you see a barn ?

A: no

Q: what color are the bulls ?

A: most of them appear to be brown

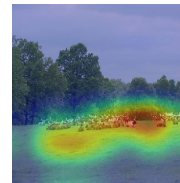

are the bulls eating ?

A: no

GT: no

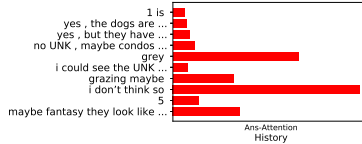

Q: how many bulls are in the photo ?

A: more than 30

Q: do you see a barn ?

A: no

Q: what color are the bulls ?

A: most of them appear to be brown

Q: are there any other animals ?

A: no

Q: do you see people ?

A: no

Q: do you see any buildings ?

A: no

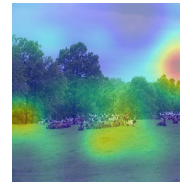

are they in a fence ?

A: no

GT: i do n't see a fence

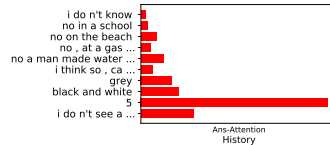

Q: how many bulls are in the photo ?

A: more than 30

Q: do you see a barn ?

A: no

Q: what color are the bulls ?

A: most of them appear to be brown

Q: are there any other animals ?

A: no

Q: do you see people ?

A: no

Q: do you see any buildings ?

A: no

Q: are the bulls eating ?

A: no

Q: do they all have horns ?

A: it appears they all do

Q: is it sunny ?

A: yes

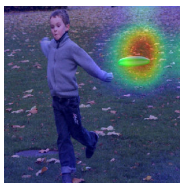

is the photo in color ?  
A: yes  
GT: yes

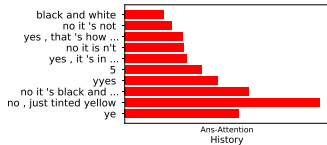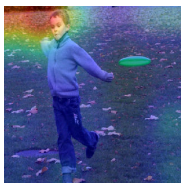

any other people ?  
A: no  
GT: no

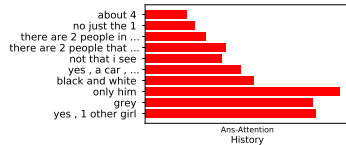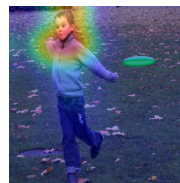

how old does the boy look ?  
A: 7  
GT: 7

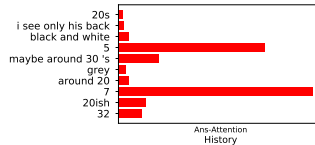

Q: is the photo in color ?  
A: yes  
Q: any other people ?  
A: no

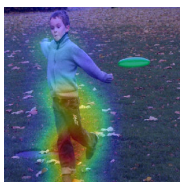

what is he wearing ?  
A: black shorts and a yellow t  
GT: zip up sweater , jeans and shoes

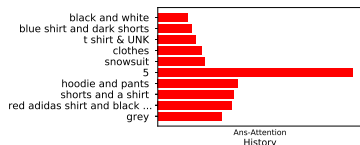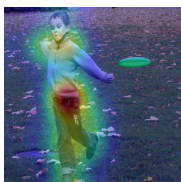

what color is his sweater ?  
A: black  
GT: gray

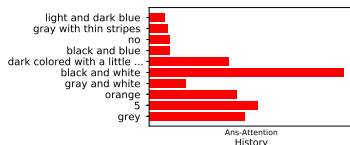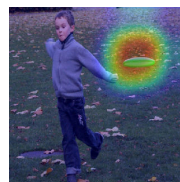

what color is the frisbee ?  
A: green  
GT: green

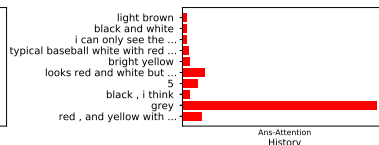

Q: is the photo in color ?  
A: yes  
Q: any other people ?  
A: no  
Q: how old does the boy look ?  
A: 7  
Q: what is he wearing ?  
A: zip up sweater , jeans and shoes  
Q: what color is his sweater ?  
A: gray

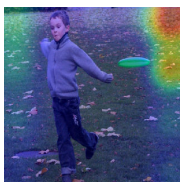

is it sunny ?  
A: yes  
GT: yes

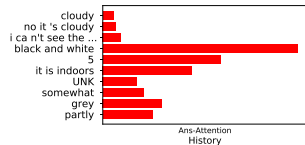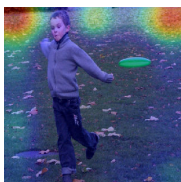

Q: do you see any buildings or houses ?  
A: no  
GT: no

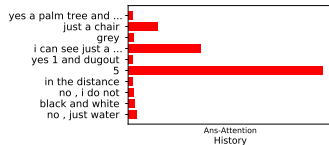

Q: is the photo in color ?  
A: yes  
Q: any other people ?  
A: no  
Q: how old does the boy look ?  
A: 7  
Q: what is he wearing ?  
A: zip up sweater , jeans and shoes  
Q: what color is his sweater ?  
A: gray  
Q: what color is the frisbee ?  
A: green  
Q: is it sunny ?  
A: yes  
Q: any trees in the yard ?  
A: no

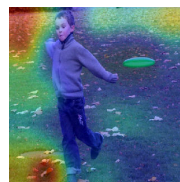

is he on a lawn ?  
A: yes  
GT: yes

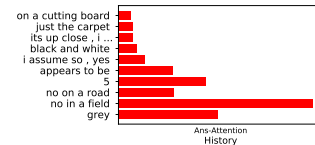

Q: is the photo in color ?  
A: yes  
Q: any other people ?  
A: no  
Q: how old does the boy look ?  
A: 7  
Q: what is he wearing ?  
A: zip up sweater , jeans and shoes  
Q: what color is his sweater ?  
A: gray  
Q: what color is the frisbee ?  
A: green  
Q: is it sunny ?  
A: yes  
Q: any trees in the yard ?  
A: no  
Q: do you see any buildings or houses ?  
A: no

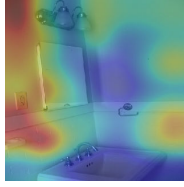

is the room a bathroom ?  
A: yes  
GT: yes

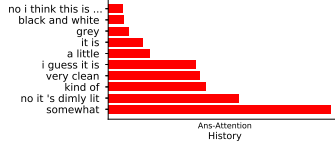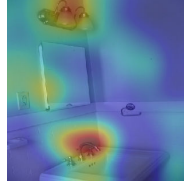

Q: are there any people in the image ?  
A: no  
GT: no

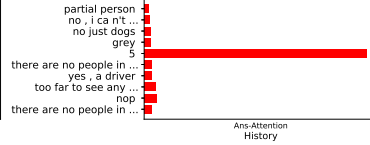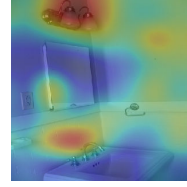

Q: is there a cabinet under the sink ?  
A: no  
GT: under the sink is n't visible

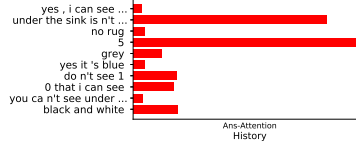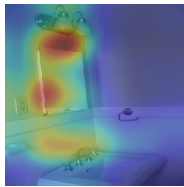

Q: what is in the reflection of the mirror ?  
A: of a stand alone shower stall and a door  
GT: a small towel hanger

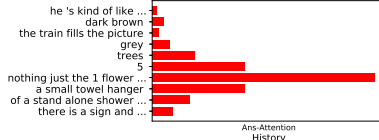

Q: is the room a bathroom ?  
A: yes  
Q: are there any people in the image ?  
A: no  
Q: is there a cabinet under the sink ?  
A: under the sink is n't visible

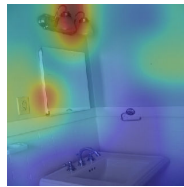

is there a towel on it ?  
A: no  
GT: no

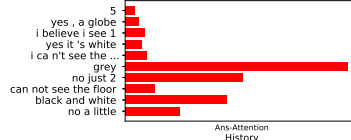

Q: is the room a bathroom ?  
A: yes  
Q: are there any people in the image ?  
A: no  
Q: is there a cabinet under the sink ?  
A: under the sink is n't visible  
Q: what is in the reflection of the mirror ?  
A: a small towel hanger

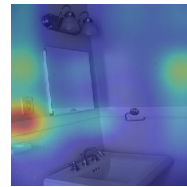

what color is the wall ?  
A: white  
GT: white

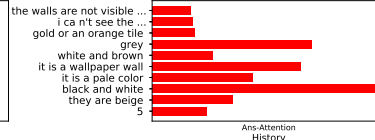

Q: is the room a bathroom ?  
A: yes  
Q: are there any people in the image ?  
A: no  
Q: is there a cabinet under the sink ?  
A: under the sink is n't visible  
Q: what is in the reflection of the mirror ?  
A: a small towel hanger  
Q: is there a towel on it ?  
A: no  
Q: is the light above the mirror ?  
A: yes ,there is 2

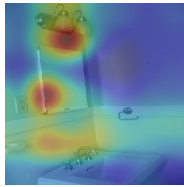

Q: is there any soap on the sink ?  
A: i ca n't see inside the whole sink  
GT: no

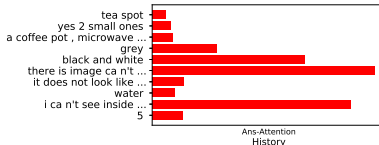

Q: is the room a bathroom ?  
A: yes  
Q: are there any people in the image ?  
A: no  
Q: is there a cabinet under the sink ?  
A: under the sink is n't visible  
Q: what is in the reflection of the mirror ?  
A: a small towel hanger  
Q: is there a towel on it ?  
A: no  
Q: is the light above the mirror ?  
A: yes ,there is 2  
Q: what color is the wall ?  
A: white

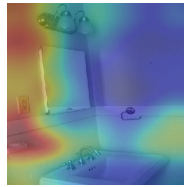

is the water on ?  
A: no  
GT: no

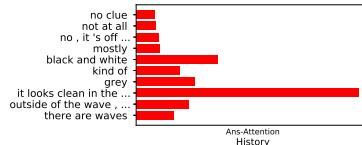

Q: is the room a bathroom ?  
A: yes  
Q: are there any people in the image ?  
A: no  
Q: is there a cabinet under the sink ?  
A: under the sink is n't visible  
Q: what is in the reflection of the mirror ?  
A: a small towel hanger  
Q: is there a towel on it ?  
A: no  
Q: is the light above the mirror ?  
A: yes ,there is 2  
Q: what color is the wall ?  
A: white  
Q: is there any soap on the sink ?  
A: no

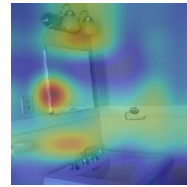

is the sink clean ?  
A: yes  
GT: yes

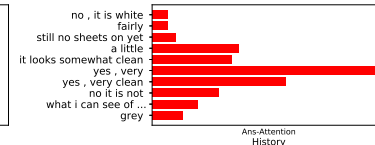

Q: is the room a bathroom ?  
A: yes  
Q: are there any people in the image ?  
A: no  
Q: is there a cabinet under the sink ?  
A: under the sink is n't visible  
Q: what is in the reflection of the mirror ?  
A: a small towel hanger  
Q: is there a towel on it ?  
A: no  
Q: is the light above the mirror ?  
A: yes ,there is 2  
Q: what color is the wall ?  
A: white  
Q: is there any soap on the sink ?  
A: no  
Q: is the water on ?  
A: no

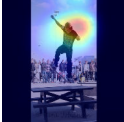

Q: how old is the skateboarder ?  
A: none  
Q: ? none

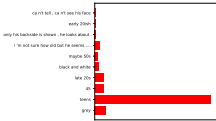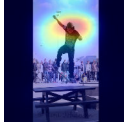

Q: what is the skateboarder's gender ?  
A: none  
Q: ? none

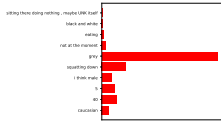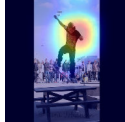

Q: what is the skateboarder's weight ?  
A: none  
Q: ? none

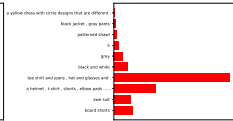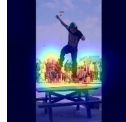

Q: do you see any other people ?  
A: yes  
Q: ? yes

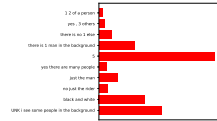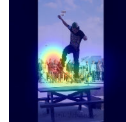

Q: how many other people ?  
A: 5  
Q: ? none

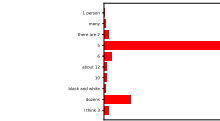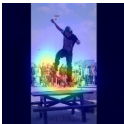

Q: are the people watching the skateboarder ?  
A: yes  
Q: ? yes

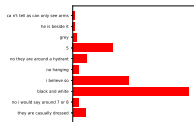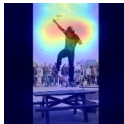

Q: is the skateboarder in the air ?  
A: yes  
Q: ? yes

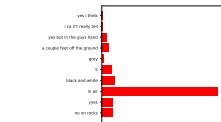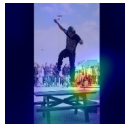

Q: is this all a skateboard jump ?  
A: yes  
Q: ? no

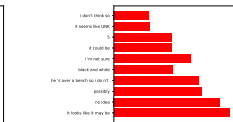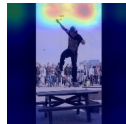

Q: is it raining day ?  
A: yes  
Q: ? yes

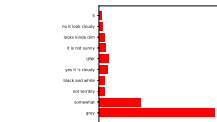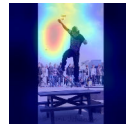

Q: does the skateboarder look like he's going to 'lose' a month's testing ?  
A: yes  
Q: ? yes

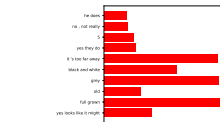

Q: how old is the skateboarder ?  
A: none  
Q: ? none

Q: what is the skateboarder's gender ?  
A: none  
Q: ? none

Q: what is the skateboarder's weight ?  
A: none  
Q: ? none

Q: do you see any other people ?  
A: yes  
Q: ? yes

Q: how many other people ?  
A: 5  
Q: ? none

Q: how old is the skateboarder ?  
A: none  
Q: ? none

Q: what is the skateboarder's gender ?  
A: none  
Q: ? none

Q: what is the skateboarder's weight ?  
A: none  
Q: ? none

Q: do you see any other people ?  
A: yes  
Q: ? yes

Q: how many other people ?  
A: 5  
Q: ? none

Q: how old is the skateboarder ?  
A: none  
Q: ? none

Q: what is the skateboarder's gender ?  
A: none  
Q: ? none

Q: what is the skateboarder's weight ?  
A: none  
Q: ? none

Q: do you see any other people ?  
A: yes  
Q: ? yes

Q: how many other people ?  
A: 5  
Q: ? none

Q: how old is the skateboarder ?  
A: none  
Q: ? none

Q: what is the skateboarder's gender ?  
A: none  
Q: ? none

Q: what is the skateboarder's weight ?  
A: none  
Q: ? none

Q: do you see any other people ?  
A: yes  
Q: ? yes

Q: how many other people ?  
A: 5  
Q: ? none

Q: how old is the skateboarder ?  
A: none  
Q: ? none

Q: what is the skateboarder's gender ?  
A: none  
Q: ? none

Q: what is the skateboarder's weight ?  
A: none  
Q: ? none

Q: do you see any other people ?  
A: yes  
Q: ? yes

Q: how many other people ?  
A: 5  
Q: ? none

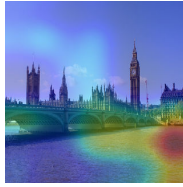

do you see any people ?  
A: no  
GT: noi

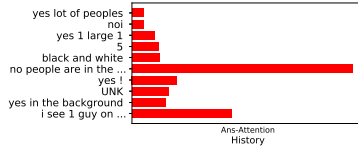

Q: is this in color ?  
A: yes

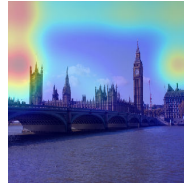

is it day time ?  
A: yes  
GT: yes

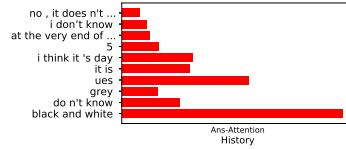

Q: is this in color ?  
A: yes  
Q: do you see any people ?  
A: noi

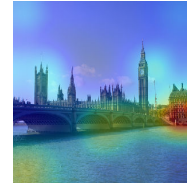

is the bridge made of stone ?  
A: yes  
GT: yes

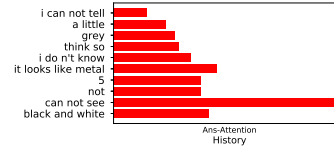

Q: is this in color ?  
A: yes  
Q: do you see any people ?  
Q: is it day time ?  
A: yes

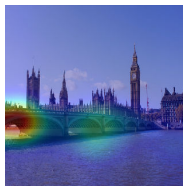

is it in an arch ?  
A: no  
GT: no

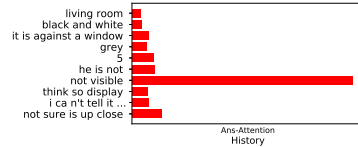

Q: is this in color ?  
A: yes  
Q: do you see any people ?  
A: noi  
Q: is it day time ?  
A: yes  
Q: is the bridge made of stone ?  
A: yes

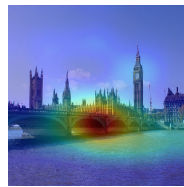

is it straight ?  
A: yes  
GT: yes

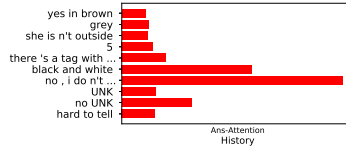

Q: is this in color ?  
A: yes  
Q: do you see any people ?  
A: noi  
Q: is it day time ?  
A: yes  
Q: is the bridge made of stone ?  
A: yes  
Q: is it in an arch ?  
A: no

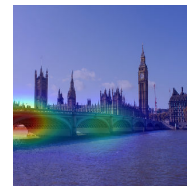

any cars over it ?  
A: no  
GT: ca n't see

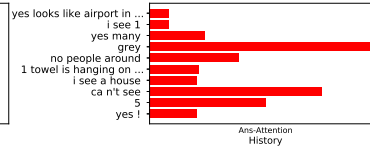

Q: is this in color ?  
A: yes  
Q: do you see any people ?  
A: noi  
Q: is it day time ?  
A: yes  
Q: is the bridge made of stone ?  
A: yes  
Q: is it in an arch ?  
A: no  
Q: is it straight ?  
A: yes

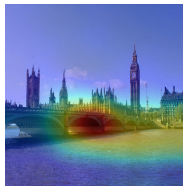

is the river calm ?  
A: fairly  
GT: yes

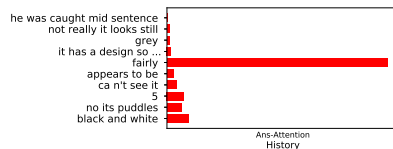

Q: is this in color ?  
A: yes  
Q: do you see any people ?  
A: noi  
Q: is it day time ?  
A: yes  
Q: is the bridge made of stone ?  
A: yes  
Q: is it in an arch ?  
A: no  
Q: is it straight ?  
A: yes  
Q: any cars over it ?  
A: ca n't see

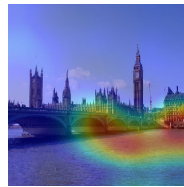

any animals ?  
A: no  
GT: no

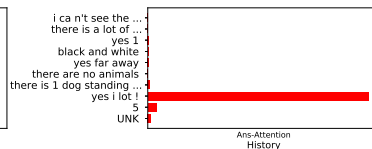

Q: is this in color ?  
A: yes  
Q: do you see any people ?  
A: noi  
Q: is it day time ?  
A: yes  
Q: is the bridge made of stone ?  
A: yes  
Q: is it in an arch ?  
A: no  
Q: is it straight ?  
A: yes  
Q: any cars over it ?  
A: ca n't see  
Q: is the river calm ?  
A: yes

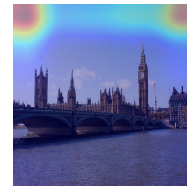

is it sunny ?  
A: yes  
GT: yes

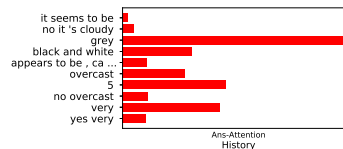

Q: is this in color ?  
A: yes  
Q: do you see any people ?  
A: noi  
Q: is it day time ?  
A: yes  
Q: is the bridge made of stone ?  
A: yes  
Q: is it in an arch ?  
A: no  
Q: is it straight ?  
A: yes  
Q: any cars over it ?  
A: ca n't see  
Q: is the river calm ?  
A: yes  
Q: any animals ?  
A: no



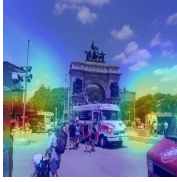

is this outdoors ?  
A: yes  
GT: yes

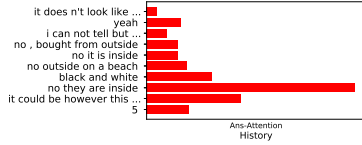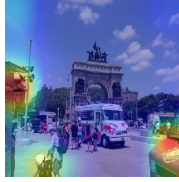

is the picture in color ?  
A: yes  
GT: yes

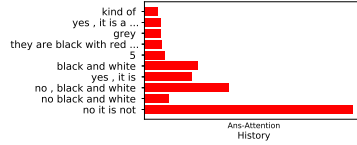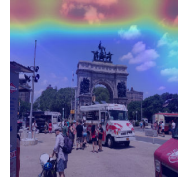

is it day ?  
A: yes  
GT: yes

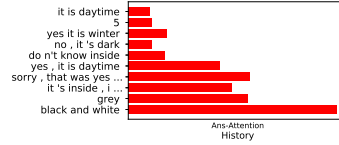

Q: is this outdoors ?  
A: yes  
Q: is the picture in color ?  
A: yes

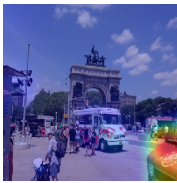

what color is the bus ?  
A: red and white  
GT: red and white

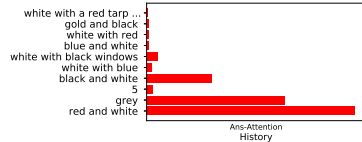

Q: is this outdoors ?  
A: yes  
Q: is the picture in color ?  
A: yes  
Q: is it day ?  
A: yes

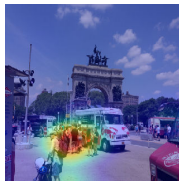

any people seen ?  
A: a few  
GT: yes quite a few

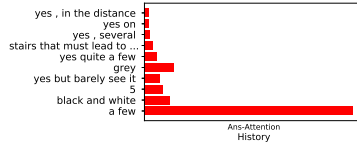

Q: is this outdoors ?  
A: yes  
Q: is the picture in color ?  
A: yes  
Q: is it day ?  
A: yes  
Q: what color is the bus ?  
A: red and white

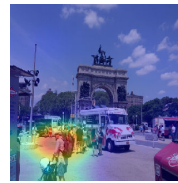

where men ?  
A: yes  
GT: some

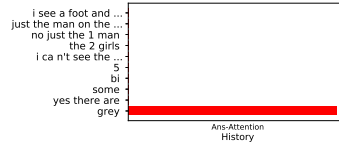

Q: is this outdoors ?  
A: yes  
Q: is the picture in color ?  
A: yes  
Q: is it day ?  
A: yes  
Q: what color is the bus ?  
A: red and white  
Q: any people seen ?  
A: yes quite a few

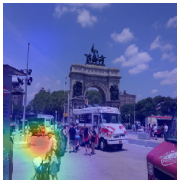

their woman ?  
A: woman  
GT: yes

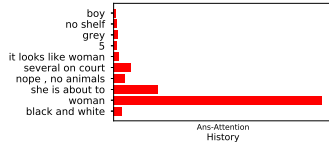

Q: is this outdoors ?  
A: yes  
Q: is the picture in color ?  
A: yes  
Q: is it day ?  
A: yes  
Q: what color is the bus ?  
A: red and white  
Q: any people seen ?  
A: yes quite a few  
Q: where men ?  
A: some

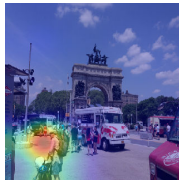

their children 's ?  
A: some and a couple are children  
GT: yes

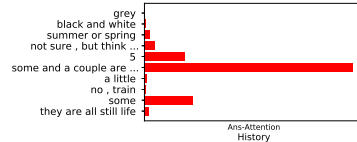

Q: is this outdoors ?  
A: yes  
Q: is the picture in color ?  
A: yes  
Q: is it day ?  
A: yes  
Q: what color is the bus ?  
A: red and white  
Q: any people seen ?  
A: yes quite a few  
Q: where men ?  
A: some  
Q: their woman ?  
A: yes

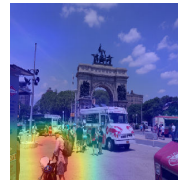

what children wearing ?  
A: t shirts and jeans  
GT: clothes

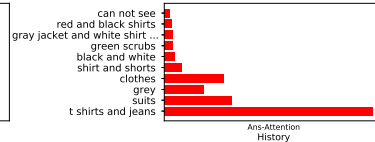

Q: is this outdoors ?  
A: yes  
Q: is the picture in color ?  
A: yes  
Q: is it day ?  
A: yes  
Q: what color is the bus ?  
A: red and white  
Q: any people seen ?  
A: yes quite a few  
Q: where men ?  
A: some  
Q: their woman ?  
A: yes  
Q: their children 's ?  
A: yes  
Q: what women wearing ?  
A: casual clothes , there are a lot of people

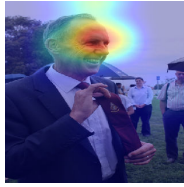

how old is the man ?  
A: 70 's maybe  
GT: 70 's maybe

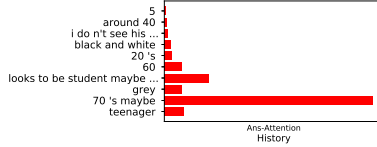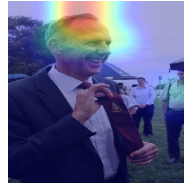

what color hair does he have ?  
A: grey  
GT: grey

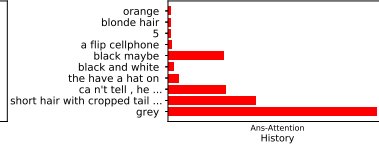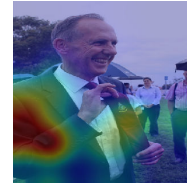

is he wearing a suit ?  
A: no  
GT: yes

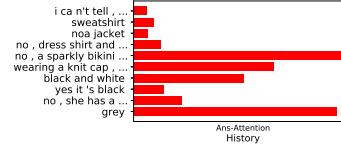

Q: how old is the man ?  
A: 70 's maybe  
Q: what color hair does he have ?  
A: grey

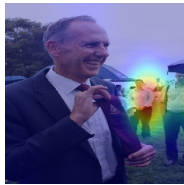

how many other people ?  
A: a lot in the background  
GT: i see a few in the background

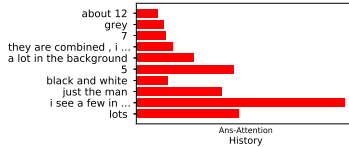

Q: how old is the man ?  
A: 70 's maybe  
Q: what color hair does he have ?  
A: grey  
Q: is he wearing a suit ?  
A: yes

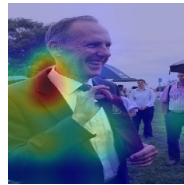

what color shirt ?  
A: black  
GT: white

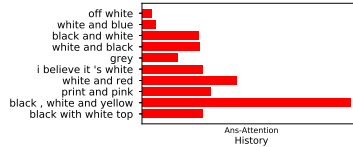

Q: how old is the man ?  
A: 70 's maybe  
Q: what color hair does he have ?  
A: grey  
Q: is he wearing a suit ?  
A: yes  
Q: how many other people ?  
A: i see a few in the background  
Q: what color suit jacket ?  
A: black

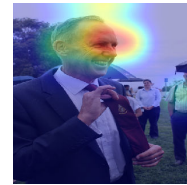

does he wear glasses ?  
A: no  
GT: no

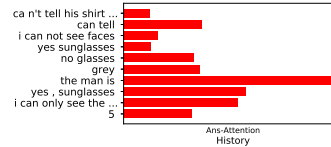

Q: how old is the man ?  
A: 70 's maybe  
Q: what color hair does he have ?  
A: grey  
Q: is he wearing a suit ?  
A: yes  
Q: how many other people ?  
A: i see a few in the background  
Q: what color suit jacket ?  
A: black  
Q: what color shirt ?  
A: white

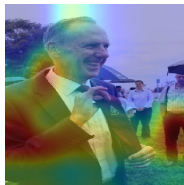

Q: is the tie a bow tie or regular tie ?  
A: regular  
GT: regular

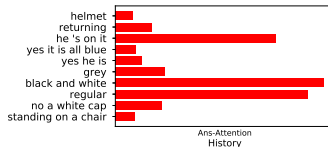

Q: how old is the man ?  
A: 70 's maybe  
Q: what color hair does he have ?  
A: grey  
Q: is he wearing a suit ?  
A: yes  
Q: how many other people ?  
A: i see a few in the background  
Q: what color suit jacket ?  
A: black  
Q: what color shirt ?  
A: white  
Q: does he wear glasses ?  
A: no

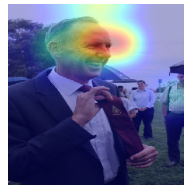

is the man smiling ?  
A: no  
GT: yes

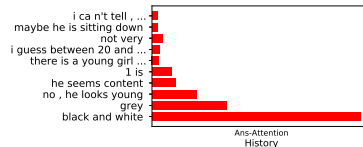

Q: how old is the man ?  
A: 70 's maybe  
Q: what color hair does he have ?  
A: grey  
Q: is he wearing a suit ?  
A: yes  
Q: how many other people ?  
A: i see a few in the background  
Q: what color suit jacket ?  
A: black  
Q: what color shirt ?  
A: white  
Q: does he wear glasses ?  
A: no  
Q: is the tie a bow tie or regular tie ?  
A: regular

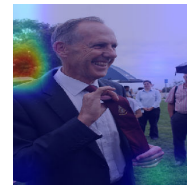

is this indoors or out ?  
A: outdoors  
GT: indoors

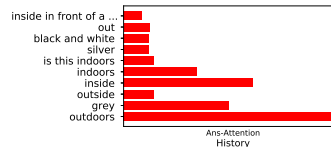

Q: how old is the man ?  
A: 70 's maybe  
Q: what color hair does he have ?  
A: grey  
Q: is he wearing a suit ?  
A: yes  
Q: how many other people ?  
A: i see a few in the background  
Q: what color suit jacket ?  
A: black  
Q: what color shirt ?  
A: white  
Q: does he wear glasses ?  
A: no  
Q: is the tie a bow tie or regular tie ?  
A: regular  
Q: is the man smiling ?  
A: yes

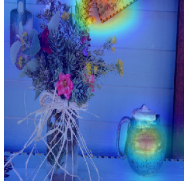

is the photo in color ?  
A: yes  
GT: yes

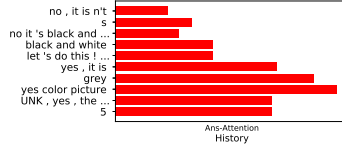

Ans-Attention  
History

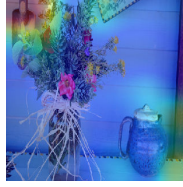

is there any people ?  
A: no  
GT: no

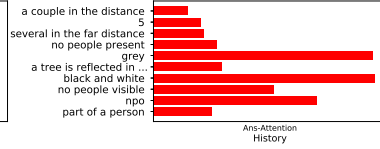

Ans-Attention  
History

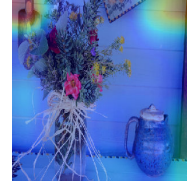

is this indoors or outdoors ?  
A: indoors  
GT: outdoors

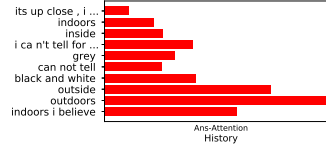

Ans-Attention  
History

Q: is the photo in color ?  
A: yes  
Q: is there any people ?  
A: no

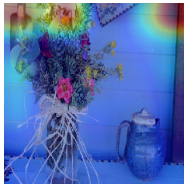

is it daytime ?  
A: yes  
GT: yes

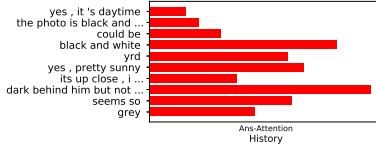

Ans-Attention  
History

Q: is the photo in color ?  
A: yes  
Q: is there any people ?  
A: no  
Q: is this indoors or outdoors ?  
A: outdoors

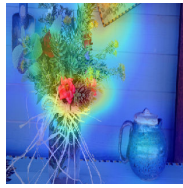

is there any roses ?  
A: no  
GT: yes

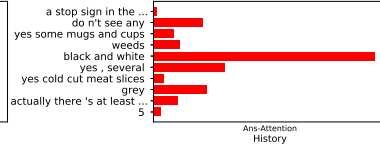

Ans-Attention  
History

Q: is the photo in color ?  
A: yes  
Q: is there any people ?  
A: no  
Q: is this indoors or outdoors ?  
A: outdoors  
Q: is it daytime ?  
A: yes

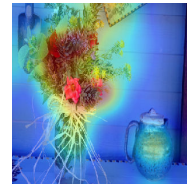

any yellow flowers ?  
A: no  
GT: yes

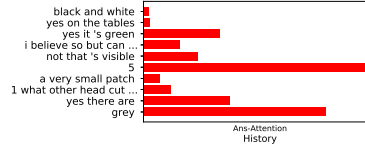

Ans-Attention  
History

Q: is the photo in color ?  
A: yes  
Q: is there any people ?  
A: no  
Q: is this indoors or outdoors ?  
A: outdoors  
Q: is it daytime ?  
A: yes  
Q: is there any roses ?  
A: yes

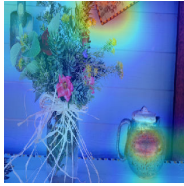

Q: is there a design on the vase ?  
A: no  
GT: yes

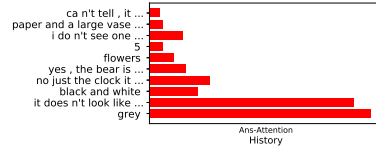

Ans-Attention  
History

Q: is the photo in color ?  
A: yes  
Q: is there any people ?  
A: no  
Q: is this indoors or outdoors ?  
A: outdoors  
Q: is it daytime ?  
A: yes  
Q: is there any roses ?  
A: yes  
Q: any yellow flowers ?  
A: yes

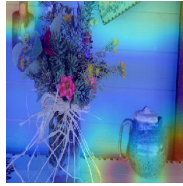

is there grass ?  
A: no  
GT: no

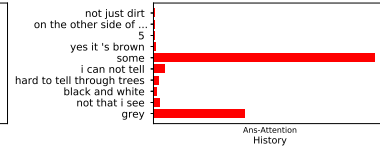

Ans-Attention  
History

Q: is the photo in color ?  
A: yes  
Q: is there any people ?  
A: no  
Q: is this indoors or outdoors ?  
A: outdoors  
Q: is it daytime ?  
A: yes  
Q: is there any roses ?  
A: yes  
Q: any yellow flowers ?  
A: yes  
Q: is there a design on the vase ?  
A: yes  
Q: is there water in the vase ?  
A: yes

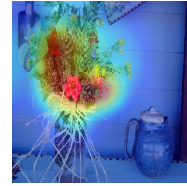

how many flowers ?  
A: many  
GT: 12

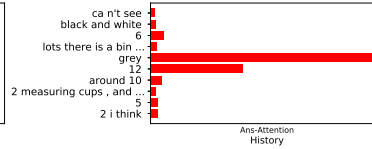

Ans-Attention  
History

Q: is the photo in color ?  
A: yes  
Q: is there any people ?  
A: no  
Q: is this indoors or outdoors ?  
A: outdoors  
Q: is it daytime ?  
A: yes  
Q: is there any roses ?  
A: yes  
Q: any yellow flowers ?  
A: yes  
Q: is there a design on the vase ?  
A: yes  
Q: is there water in the vase ?  
A: yes  
Q: is there grass ?  
A: no



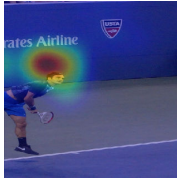

Q: can you see the guy's face ?  
 A: yes  
 GT: yes i can

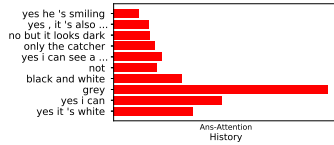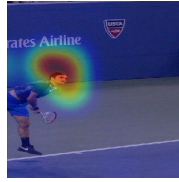

Q: does he have facial hair ?  
 A: no he does not  
 GT: no he does not

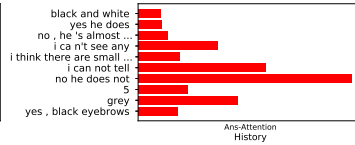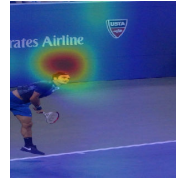

Q: what color are his eyes ?  
 A: they look gray  
 GT: they look brown

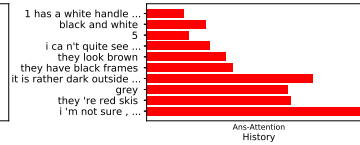

Q: can you see the guy 's face ?  
 A: yes i can

Q: does he have facial hair ?  
 A: no he does not

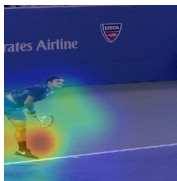

Q: is he wearing shorts ?  
 A: yes he is  
 GT: yes he is

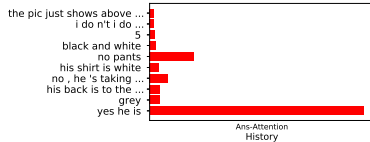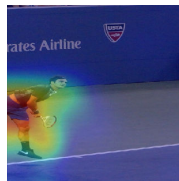

Q: what color shorts is he wearing ?  
 A: black and white  
 GT: blue and white

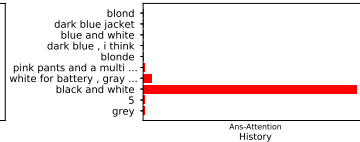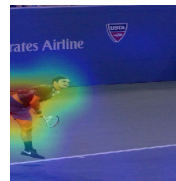

Q: does his shirt match ?  
 A: no , looks more like he's in middle of word  
 GT: it is black with a little blue so somewhat

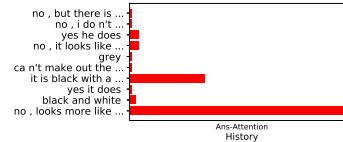

Q: can you see the guy 's face ?  
 A: yes i can  
 Q: does he have facial hair ?  
 A: no he does not  
 Q: what color are his eyes ?  
 A: they look brown

Q: can you see the guy 's face ?  
 A: yes i can  
 Q: does he have facial hair ?  
 A: no he does not  
 Q: what color are his eyes ?  
 A: they look brown  
 Q: is he wearing shorts ?  
 A: yes he is

Q: can you see the guy 's face ?  
 A: yes i can  
 Q: does he have facial hair ?  
 A: no he does not  
 Q: what color are his eyes ?  
 A: they look brown  
 Q: is he wearing shorts ?  
 A: yes he is  
 Q: what color shorts is he wearing ?  
 A: blue and white

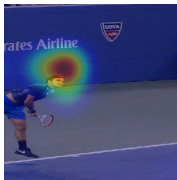

Q: what color is his hair ?  
 A: his head is shaved  
 GT: it is dark brown black

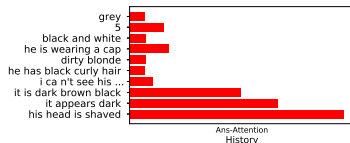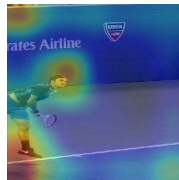

Q: are there people watching ?  
 A: yes i can just barely see some of the stands  
 GT: yes i can just barely see some of the stands

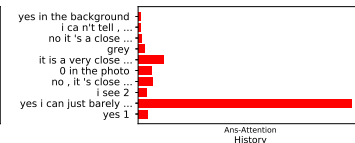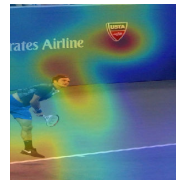

Q: does he have an opponent ?  
 A: no  
 GT: not that is visible but yes he is in action

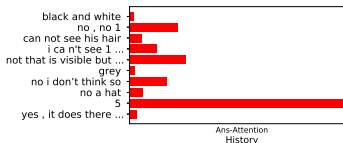

Q: can you see the guy 's face ?  
 A: yes i can  
 Q: does he have facial hair ?  
 A: no he does not  
 Q: what color are his eyes ?  
 A: they look brown  
 Q: is he wearing shorts ?  
 A: yes he is  
 Q: what color shorts is he wearing ?  
 A: blue and white  
 Q: does his shirt match ?  
 A: it is black with a little blue so somewhat

Q: can you see the guy 's face ?  
 A: yes i can  
 Q: does he have facial hair ?  
 A: no he does not  
 Q: what color are his eyes ?  
 A: they look brown  
 Q: is he wearing shorts ?  
 A: yes he is  
 Q: what color shorts is he wearing ?  
 A: blue and white  
 Q: does his shirt match ?  
 A: it is black with a little blue so somewhat  
 Q: what color is his hair ?  
 A: it is dark brown black  
 Q: is he wearing a sweatband ?  
 A: yes he is

Q: can you see the guy 's face ?  
 A: yes i can  
 Q: does he have facial hair ?  
 A: no he does not  
 Q: what color are his eyes ?  
 A: they look brown  
 Q: is he wearing shorts ?  
 A: yes he is  
 Q: what color shorts is he wearing ?  
 A: blue and white  
 Q: does his shirt match ?  
 A: it is black with a little blue so somewhat  
 Q: what color is his hair ?  
 A: it is dark brown black  
 Q: is he wearing a sweatband ?  
 A: yes he is  
 Q: are there people watching ?  
 A: yes i can just barely see some of the stands



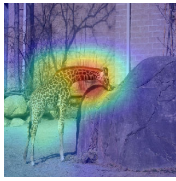

can you see the entire giraffe ?  
A: yes  
GT: yes

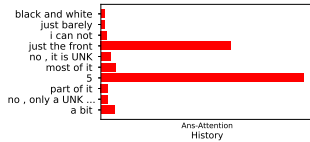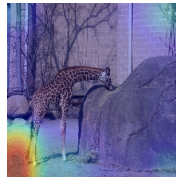

Q: is it standing in grass  
or sand ?  
A: standing on pavement i think  
GT: standing on pavement i think

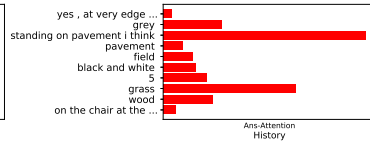

Q: can you see the entire giraffe ?  
A: yes

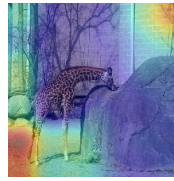

is the giraffe inside a pen ?  
A: no  
GT: yes

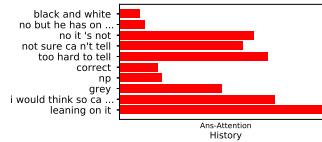

Q: can you see the entire giraffe ?  
A: yes  
Q: is it standing in grass or sand ?  
A: standing on pavement i think  
Q: are there any other animals ?  
A: no

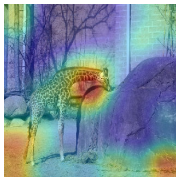

are there any people present ?  
A: no  
GT: no

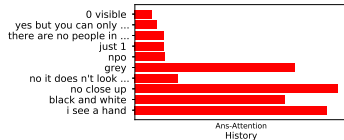

Q: can you see the entire giraffe ?  
A: yes  
Q: is it standing in grass or sand ?  
A: standing on pavement i think  
Q: are there any other animals ?  
A: no  
Q: is the giraffe inside a pen ?  
A: yes

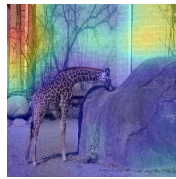

Q: can you see any food  
or water for the giraffe ?  
A: no  
GT: he is eating hay

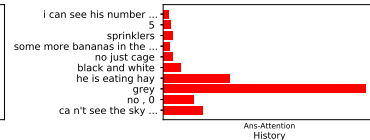

Q: can you see the entire giraffe ?  
A: yes  
Q: is it standing in grass or sand ?  
A: standing on pavement i think  
Q: are there any other animals ?  
A: no  
Q: is the giraffe inside a pen ?  
A: yes  
Q: are there any people present ?  
A: no

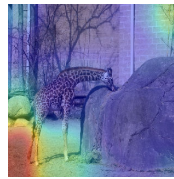

is the hay in a feeder ?  
A: no, on top of a huge rock  
GT: no, on top of a huge rock

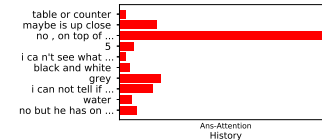

Q: can you see the entire giraffe ?  
A: yes  
Q: is it standing in grass or sand ?  
A: standing on pavement i think  
Q: are there any other animals ?  
A: no  
Q: is the giraffe inside a pen ?  
A: yes  
Q: are there any people present ?  
A: no  
Q: can you see any food or water for the giraffe ?  
A: he is eating hay

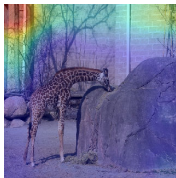

what is the weather like ?  
A: sunny  
GT: looks warm

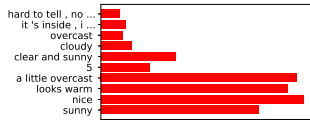

Q: can you see the entire giraffe ?  
A: yes  
Q: is it standing in grass or sand ?  
A: standing on pavement i think  
Q: are there any other animals ?  
A: no  
Q: is the giraffe inside a pen ?  
A: yes  
Q: are there any people present ?  
A: no  
Q: can you see any food or water for the giraffe ?  
A: he is eating hay  
Q: is the hay in a feeder ?  
A: no, on top of a huge rock

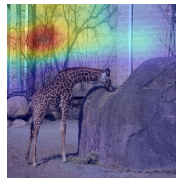

any trees in the picture ?  
A: yes  
GT: yes

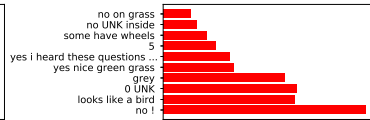

Q: can you see the entire giraffe ?  
A: yes  
Q: is it standing in grass or sand ?  
A: standing on pavement i think  
Q: are there any other animals ?  
A: no  
Q: is the giraffe inside a pen ?  
A: yes  
Q: are there any people present ?  
A: no  
Q: can you see any food or water for the giraffe ?  
A: he is eating hay  
Q: is the hay in a feeder ?  
A: no, on top of a huge rock  
Q: what is the weather like ?  
A: looks warm

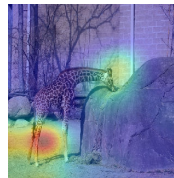

is the giraffe male or female ?  
A: male  
GT: maybe female

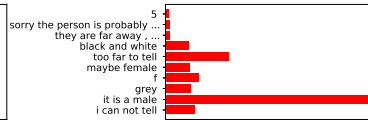

Q: can you see the entire giraffe ?  
A: yes  
Q: is it standing in grass or sand ?  
A: standing on pavement i think  
Q: are there any other animals ?  
A: no  
Q: is the giraffe inside a pen ?  
A: yes  
Q: are there any people present ?  
A: no  
Q: can you see any food or water for the giraffe ?  
A: he is eating hay  
Q: is the hay in a feeder ?  
A: no, on top of a huge rock  
Q: what is the weather like ?  
A: looks warm  
Q: any trees in the picture ?  
A: yes

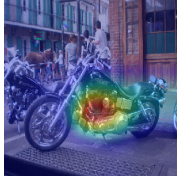

Q: what color motorcycle ?  
A: black and white  
GT: black and silver

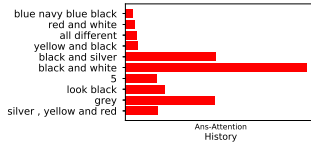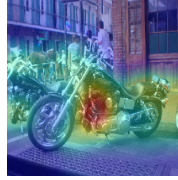

Q: is there luggage box on back ?  
A: no  
GT: no

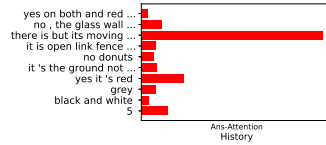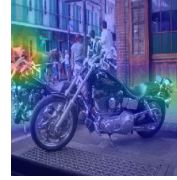

Q: any flags or other decorations on it ?  
A: no  
GT: no

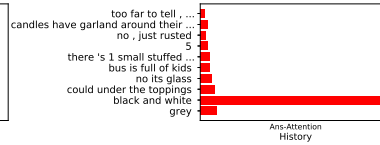

Q: what color motorcycle ?  
A: black and silver  
Q: is there luggage box on back ?  
A: no

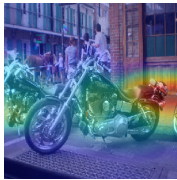

Q: is bike actually on sidewalk itself ?  
A: yes  
GT: yes

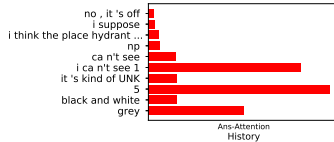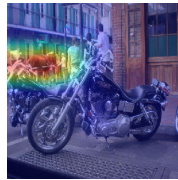

Q: any other motorcycles parked here ?  
A: no  
GT: yes

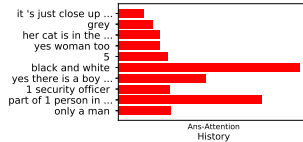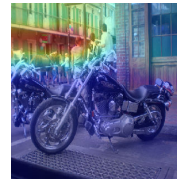

Q: is this in front of bar ?  
A: no  
GT: ca n't tell what building is

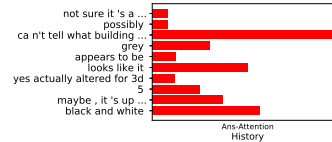

Q: what color motorcycle ?  
A: black and silver  
Q: is there luggage box on back ?  
A: no  
Q: any flags or other decorations on it ?  
A: no  
Q: is bike actually on sidewalk itself ?  
A: yes  
Q: any other motorcycles parked here ?  
A: yes

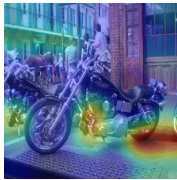

Q: can you see street ?  
A: no  
GT: no

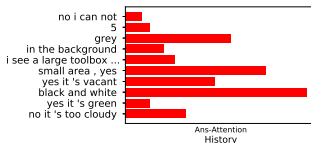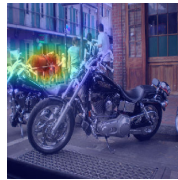

Q: how many people ?  
A: around 20  
GT: 3

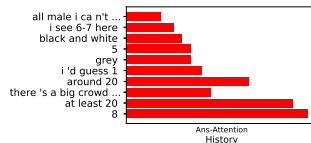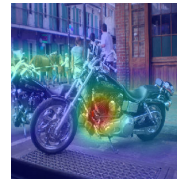

Q: are they motorcycle owners ?  
A: no  
GT: do n't think so

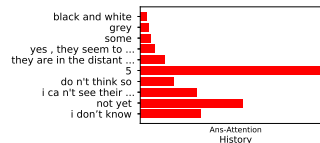

Q: what color motorcycle ?  
A: black and silver  
Q: is there luggage box on back ?  
A: no  
Q: any flags or other decorations on it ?  
A: no  
Q: is bike actually on sidewalk itself ?  
A: yes  
Q: any other motorcycles parked here ?  
A: yes  
Q: is this in front of bar ?  
A: ca n't tell what building is  
Q: can you see street ?  
A: no  
Q: is anyone walking by or standing ?  
A: yes  
Q: how many people ?  
A: 3

Q: what color motorcycle ?  
A: black and silver  
Q: is there luggage box on back ?  
A: no  
Q: any flags or other decorations on it ?  
A: no  
Q: is bike actually on sidewalk itself ?  
A: yes  
Q: any other motorcycles parked here ?  
A: yes  
Q: is this in front of bar ?  
A: ca n't tell what building is

Q: what color motorcycle ?  
A: black and silver  
Q: is there luggage box on back ?  
A: no  
Q: any flags or other decorations on it ?  
A: no  
Q: is bike actually on sidewalk itself ?  
A: yes  
Q: any other motorcycles parked here ?  
A: yes  
Q: is this in front of bar ?  
A: ca n't tell what building is  
Q: can you see street ?  
A: no  
Q: is anyone walking by or standing ?  
A: yes

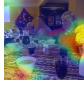

is the photo color ?  
A: yes  
GT: yes

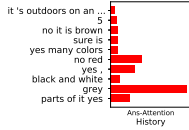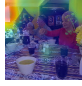

are they outside or inside ?  
A: inside  
GT: inside

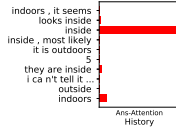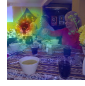

Q: do they look like they  
are in the kitchen or dining room ?  
A: this looks like a casual gathering at maybe a church social hall for a restaurant  
GT: this looks like a casual gathering at maybe a church social hall for a restaurant

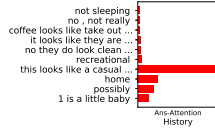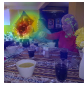

about how many people are there ?  
A: i count 9 , but there could be more  
GT: 7 or 8

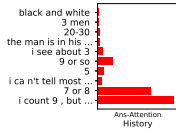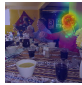

Q: is there an average age  
or multiple ages ?  
A: 40 - 60  
GT: 40 - 60

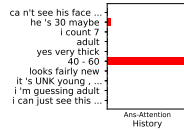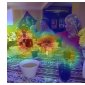

Q: does it look like they  
are drinking alcoholic beverages or regular drinks ?  
A: glass bottle of coke  
GT: there is some sort of red colored beverage in a pitcher , and in some of their glasses as well

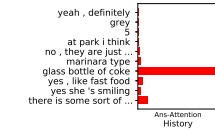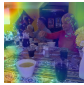

Q: does the table look fancy  
or laid back ?  
A: laid back  
GT: laid back

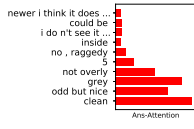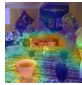

what color is it ?  
A: white  
GT: brown , white , beige , and blue , some stripes

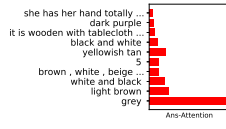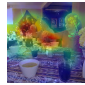

Q: does it look like they  
are being served or are they already eating ?  
A: served  
GT: brown , white , beige , and blue , some stripes

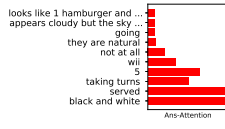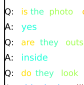

Q: is the photo color ?  
A: yes  
GT: yes  
Q: are they outside or inside ?  
A: inside  
Q: do they look like they are in the kitchen or dining  
A: this looks like a casual gathering at maybe a church social hall for a restaurant  
Q: about how many people are there ?  
A: 7 or 8  
Q: is there an average age or multiple ages ?  
A: 40 - 60  
Q: does it look like they are drinking alcoholic beverages or regular drinks ?

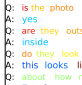

Q: is the photo color ?  
A: yes  
GT: yes  
Q: are they outside or inside ?  
A: inside  
Q: do they look like they are in the kitchen or dining  
A: this looks like a casual gathering at maybe a church social hall for a restaurant  
Q: about how many people are there ?  
A: 7 or 8  
Q: is there an average age or multiple ages ?  
A: 40 - 60  
Q: does it look like they are drinking alcoholic beverages or regular drinks ?

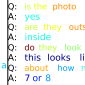

Q: is the photo color ?  
A: yes  
GT: yes  
Q: are they outside or inside ?  
A: inside  
Q: do they look like they are in the kitchen or dining room ?  
A: this looks like a casual gathering at maybe a church social hall for a restaurant  
Q: about how many people are there ?  
A: 7 or 8  
Q: is there an average age or multiple ages ?  
A: 40 - 60  
Q: does it look like they are drinking alcoholic beverages or regular drinks ?

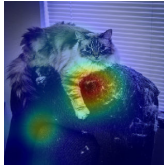

what kind of cat ?  
A: a black 1  
GT: looks like some sort of long hair tabby or calico mix

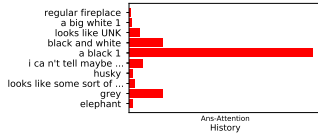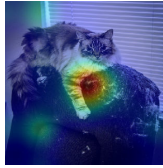

what color ?  
A: grey  
GT: tan , white and gray

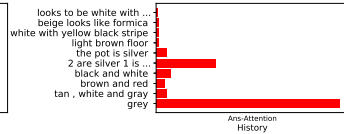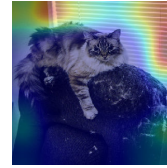

what room ?  
A: looks to be office  
GT: looks to be office

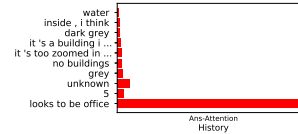

Q: what kind of cat ?

A: looks like some sort of long hair tabby or calico mix

Q: what kind of cat ?  
A: looks like some sort of long hair tabby or calico mix  
Q: what color ?  
A: tan , white and gray

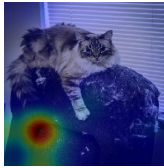

what color is chair ?  
A: grey  
GT: black

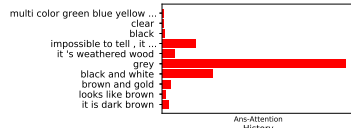

Q: what kind of cat ?  
A: looks like some sort of long hair tabby or calico mix  
Q: what color ?  
A: tan , white and gray  
Q: what room ?  
A: looks to be office

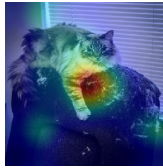

UNK ?  
A: no  
GT: can not see 1

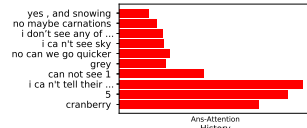

Q: what kind of cat ?  
A: looks like some sort of long hair tabby or calico mix  
Q: what color ?  
A: tan , white and gray  
Q: what room ?  
A: looks to be office  
Q: what color is chair ?  
A: black

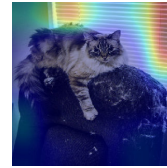

what color walls ?  
A: grey  
GT: beige

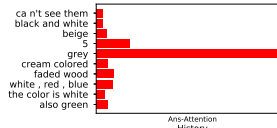

Q: what kind of cat ?  
A: looks like some sort of long hair tabby or calico mix  
Q: what color ?  
A: tan , white and gray  
Q: what room ?  
A: looks to be office  
Q: what color is chair ?  
A: black  
Q: UNK ?  
A: can not see 1  
Q: computer ?  
A: do n't see 1

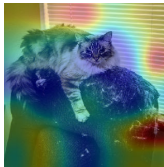

is cat clean ?  
A: yes  
GT: yes

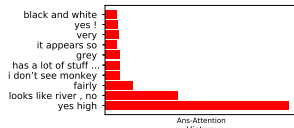

Q: what kind of cat ?  
A: looks like some sort of long hair tabby or calico mix  
Q: what color ?  
A: tan , white and gray  
Q: what room ?  
A: looks to be office  
Q: what color is chair ?  
A: black  
Q: UNK ?  
A: can not see 1  
Q: computer ?  
A: do n't see 1  
Q: what color walls ?  
A: beige

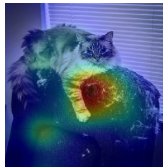

is it cute ?  
A: yes  
GT: yes

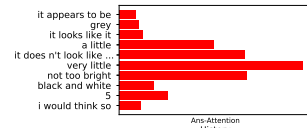

Q: what kind of cat ?  
A: looks like some sort of long hair tabby or calico mix  
Q: what color ?  
A: tan , white and gray  
Q: what room ?  
A: looks to be office  
Q: what color is chair ?  
A: black  
Q: UNK ?  
A: can not see 1  
Q: computer ?  
A: do n't see 1  
Q: what color walls ?  
A: beige  
Q: is cat clean ?  
A: yes

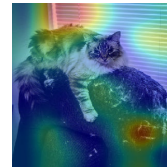

any filing cabinets ?  
A: no does n't look like it  
GT: 0 that i can see

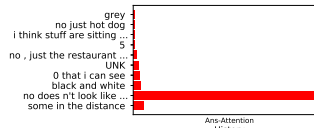

Q: what kind of cat ?  
A: looks like some sort of long hair tabby or calico mix  
Q: what color ?  
A: tan , white and gray  
Q: what room ?  
A: looks to be office  
Q: what color is chair ?  
A: black  
Q: UNK ?  
A: can not see 1  
Q: computer ?  
A: do n't see 1  
Q: what color walls ?  
A: beige  
Q: is cat clean ?  
A: yes  
Q: is it cute ?  
A: yes

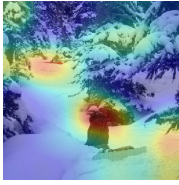

Q: is the man wearing a  
hat or helmet ?  
A: he has a hat  
GT: beanie

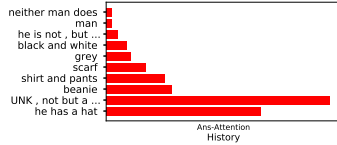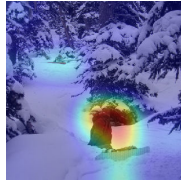

Q: color ?  
A: grey and black  
GT: white

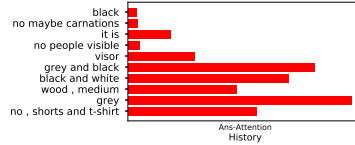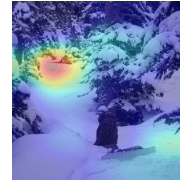

Q: what ethnicity is the man  
,if visible ?  
A: white  
GT: white

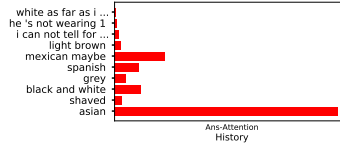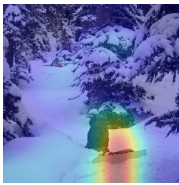

Q: what color is his snowboard ?  
A: grey  
GT: white

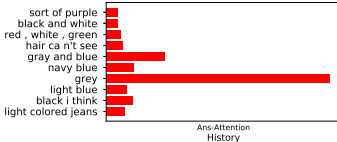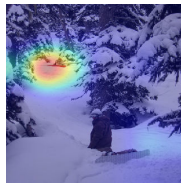

Q: is he the only person  
in the picture ?  
A: yes  
GT: yes

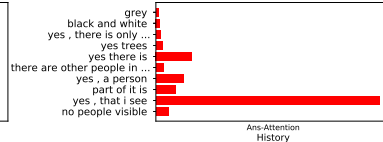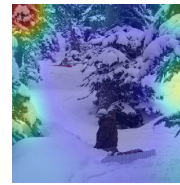

Q: is the forecast sunny ?  
A: yes  
GT: no

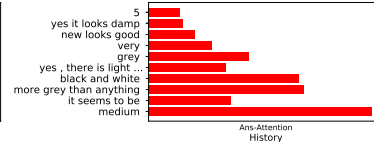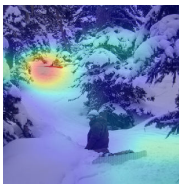

Q: is he wearing protective  
glasses ?  
A: no  
GT: yes

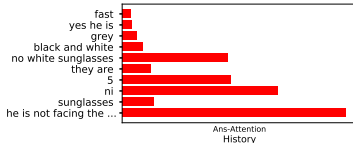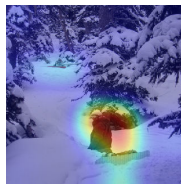

Q: color ?  
A: brown  
GT: mirrored

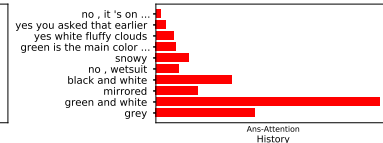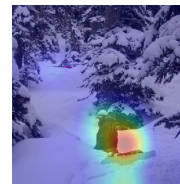

Q: what color is his snowsuit ?  
A: pink coat black pants  
GT: brown

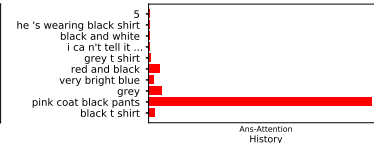

Q: is the man wearing a hat or helmet ?  
A: beanie  
Q: color ?  
A: white  
Q: what ethnicity is the man ,if visible ?  
A: white  
Q: what color is his snowboard ?  
A: white  
Q: is he the only person in the picture ?  
A: yes  
Q: is the forecast sunny ?  
A: no  
Q: do you see any trees covered with snow ?  
A: yes lots

Q: is the man wearing a hat or helmet ?  
A: beanie  
Q: color ?  
A: white  
Q: what ethnicity is the man ,if visible ?  
A: white  
Q: what color is his snowboard ?  
A: white  
Q: is he the only person in the picture ?  
A: yes  
Q: is the forecast sunny ?  
A: no  
Q: do you see any trees covered with snow ?  
A: yes lots  
Q: is he wearing protective glasses ?  
A: yes

Q: is the man wearing a hat or helmet ?  
A: beanie  
Q: color ?  
A: white  
Q: what ethnicity is the man ,if visible ?  
A: white  
Q: what color is his snowboard ?  
A: white  
Q: is he the only person in the picture ?  
A: yes  
Q: is the forecast sunny ?  
A: no  
Q: do you see any trees covered with snow ?  
A: yes lots  
Q: is he wearing protective glasses ?  
A: yes  
Q: color ?  
A: mirrored



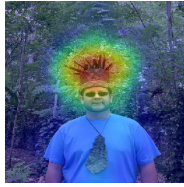

what is the crown made of ?  
A: covered  
GT: leaves

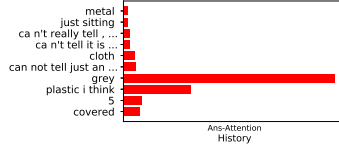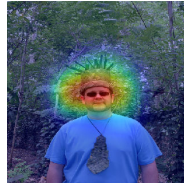

is he smiling ?  
A: yes  
GT: no

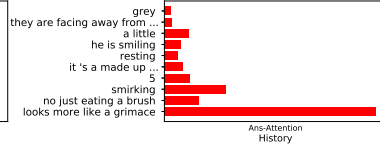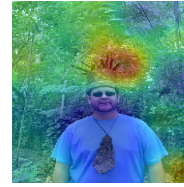

is he alone ?  
A: yes  
GT: yes

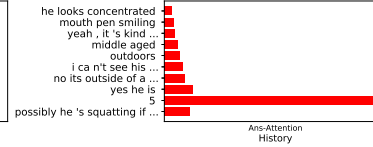

Q: what is the crown made of ?  
A: leaves  
Q: is he smiling ?  
A: no  
Q: what color is the tie ?  
A: green

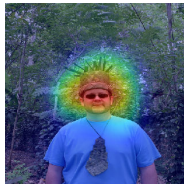

how old is he ?  
A: 20 's  
GT: 20 's

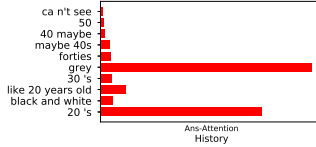

Q: what is the crown made of ?  
A: leaves  
Q: is he smiling ?  
A: no  
Q: what color is the tie ?  
A: green  
Q: is he alone ?  
A: yes

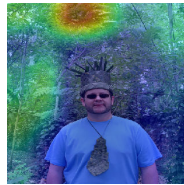

is the inside ?  
A: no  
GT: no

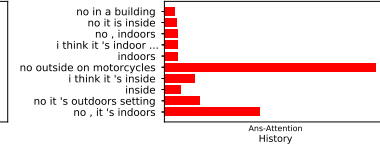

Q: what is the crown made of ?  
A: leaves  
Q: is he smiling ?  
A: no  
Q: what color is the tie ?  
A: green  
Q: is he alone ?  
A: yes  
Q: how old is he ?  
A: 20 's

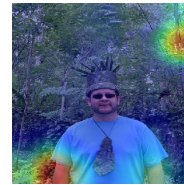

is he sitting on the ground ?  
A: yes  
GT: no

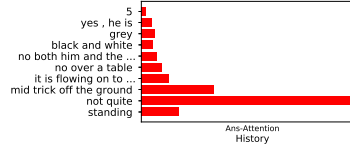

Q: what is the crown made of ?  
A: leaves  
Q: is he smiling ?  
A: no  
Q: what color is the tie ?  
A: green  
Q: is he alone ?  
A: yes  
Q: how old is he ?  
A: 20 's  
Q: is the inside ?  
A: no

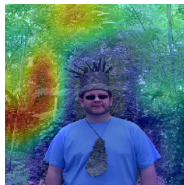

is there a building ?  
A: no  
GT: no

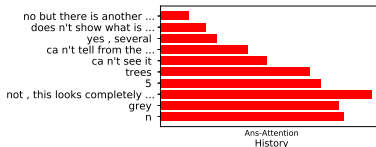

Q: what is the crown made of ?  
A: leaves  
Q: is he smiling ?  
A: no  
Q: what color is the tie ?  
A: green  
Q: is he alone ?  
A: yes  
Q: how old is he ?  
A: 20 's  
Q: is the inside ?  
A: no  
Q: is he sitting on the ground ?  
A: no

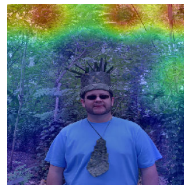

is it daytime ?  
A: yes  
GT: yes

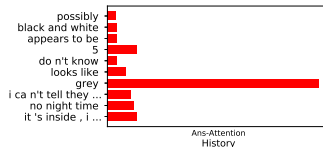

Q: what is the crown made of ?  
A: leaves  
Q: is he smiling ?  
A: no  
Q: what color is the tie ?  
A: green  
Q: is he alone ?  
A: yes  
Q: how old is he ?  
A: 20 's  
Q: is the inside ?  
A: no  
Q: is he sitting on the ground ?  
A: no  
Q: is there a building ?  
A: no

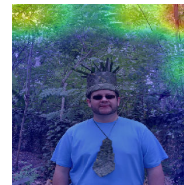

is it sunny ?  
A: yes  
GT: ca n't tell

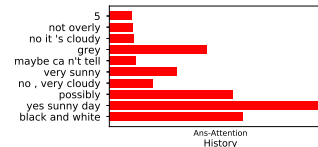

Q: what is the crown made of ?  
A: leaves  
Q: is he smiling ?  
A: no  
Q: what color is the tie ?  
A: green  
Q: is he alone ?  
A: yes  
Q: how old is he ?  
A: 20 's  
Q: is the inside ?  
A: no  
Q: is he sitting on the ground ?  
A: no  
Q: is there a building ?  
A: no  
Q: is it daytime ?  
A: yes

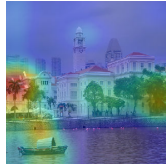

It is picture color ?

A: yes

GT: yes , it is a color photo

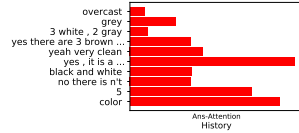

Ans-Attention  
History

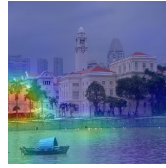

can you see any peoples ?

A: there are a few people in the other side of the river

GT: there are a few people in the other side of the river

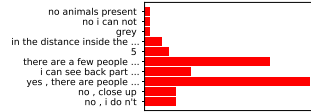

Ans-Attention  
History

Q: It is picture color ?

A: yes , it is a color photo

A: yes , it is a color photo

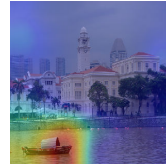

any vehicles are there ?

A: no

GT: no , a boat is in the water

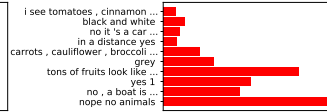

Ans-Attention  
History

Q: It is picture color ?

A: yes , it is a color photo

Q: can you see any peoples ?

A: there are a few people in the other side of the river

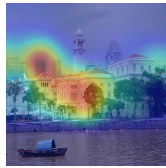

can you see building ?

A: yes

GT: yes , lots of in the background

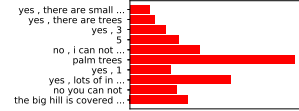

Ans-Attention  
History

Q: It is picture color ?

A: yes , it is a color photo

Q: can you see any peoples ?

A: there are a few people in the other side of the river

Q: any vehicles are there ?

A: no , a boat is in the water

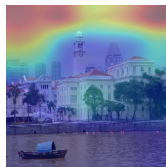

It is daytime ?

A: either that or very well lit

GT: yes

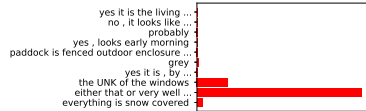

Ans-Attention  
History

Q: It is picture color ?

A: yes , it is a color photo

Q: can you see any peoples ?

A: there are a few people in the other side of the river

A: any vehicles are there ?

A: no , a boat is in the water

Q: can you see building ?

A: yes , lots of in the background

Q: can you see any sign board ?

A: no signs visible

Q: can you see traffic signal ?

A: no

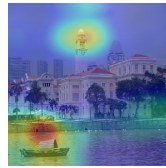

can you see any sign board ?

A: no signs visible

GT: no signs visible

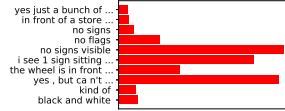

Ans-Attention  
History

Q: It is picture color ?

A: yes , it is a color photo

Q: can you see any peoples ?

A: there are a few people in the other side of the river

Q: any vehicles are there ?

A: no , a boat is in the water

Q: can you see building ?

A: yes , lots of in the background

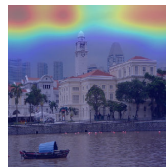

can you see sky ?

A: yes

GT: yes

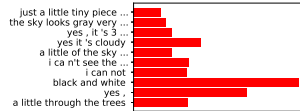

Ans-Attention  
History

Q: It is picture color ?

A: yes , it is a color photo

Q: can you see any peoples ?

A: there are a few people in the other side of the river

Q: any vehicles are there ?

A: no , a boat is in the water

Q: can you see building ?

A: yes , lots of in the background

Q: can you see any sign board ?

A: no signs visible

Q: can you see traffic signal ?

A: no

Q: It is daytime ?

A: yes

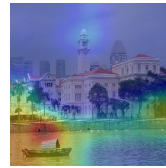

can you see traffic signal ?

A: no

GT: no

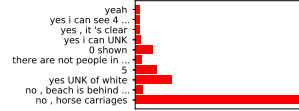

Ans-Attention  
History

Q: It is picture color ?

A: yes , it is a color photo

Q: can you see any peoples ?

A: there are a few people in the other side of the river

Q: any vehicles are there ?

A: no , a boat is in the water

Q: can you see building ?

A: yes , lots of in the background

Q: can you see any sign board ?

A: no signs visible

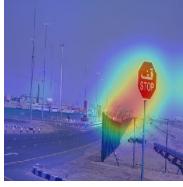

is the sign red and white ?  
A: green on 1 and red on the other  
GT: yes

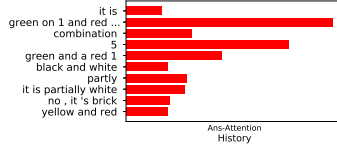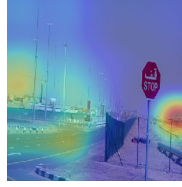

is this a city area ?  
A: yes  
GT: no

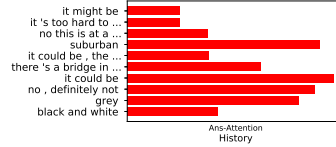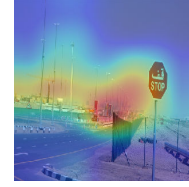

is there other signs ?  
A: no  
GT: no

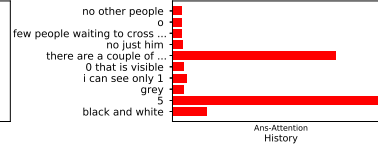

Q: is the sign red and white ?  
A: yes  
Q: is this a city area ?  
A: no

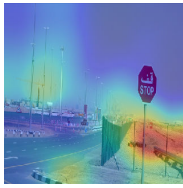

is the sign on a pole ?  
A: yes  
GT: yes

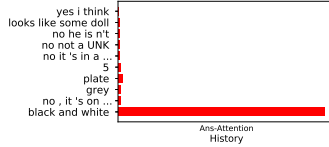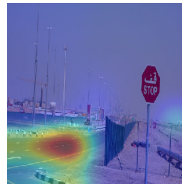

is the road lined ?  
A: yes  
GT: yes

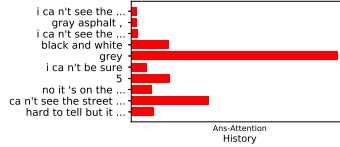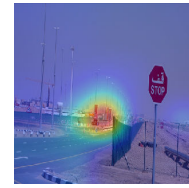

is there cars ?  
A: yes  
GT: no

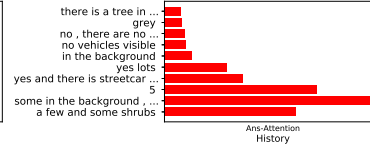

Q: is the sign red and white ?  
A: yes  
Q: is this a city area ?  
A: no  
Q: is there other signs ?  
A: no  
Q: is the sign on a pole ?  
A: yes  
Q: is the road lined ?  
A: yes

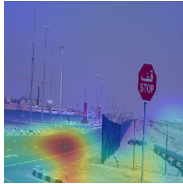

is there grass ?  
A: no  
GT: no

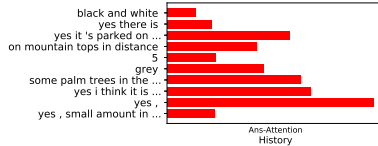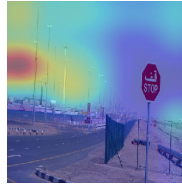

is there trees ?  
A: no  
GT: no

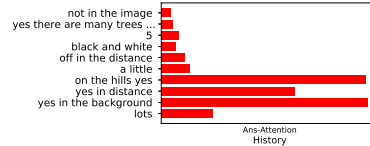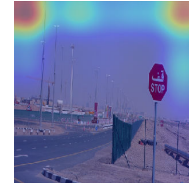

is it sunny ?  
A: yes  
GT: yes

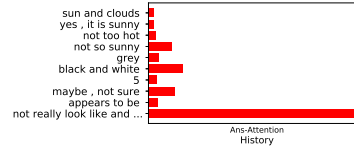

Q: is the sign red and white ?  
A: yes  
Q: is this a city area ?  
A: no  
Q: is there other signs ?  
A: no  
Q: is the sign on a pole ?  
A: yes  
Q: is the road lined ?  
A: yes  
Q: is there cars ?  
A: no  
Q: is there grass ?  
A: no  
Q: is there trees ?  
A: no  
Q: is it daytime ?  
A: yes

Q: is the sign red and white ?  
A: yes  
Q: is this a city area ?  
A: no  
Q: is there other signs ?  
A: no  
Q: is the sign on a pole ?  
A: yes  
Q: is the road lined ?  
A: yes  
Q: is there cars ?  
A: no  
Q: is there grass ?  
A: no

Q: is the sign red and white ?  
A: yes  
Q: is this a city area ?  
A: no  
Q: is there other signs ?  
A: no  
Q: is the sign on a pole ?  
A: yes  
Q: is the road lined ?  
A: yes  
Q: is there cars ?  
A: no  
Q: is there grass ?  
A: no

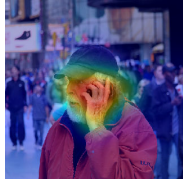

how old is he ?  
A: older man probably in 60 's  
GT: older man probably in 60 's

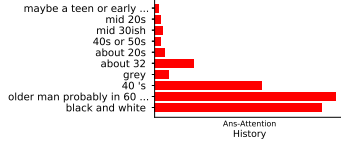

Q: what color is the hat ?  
A: black

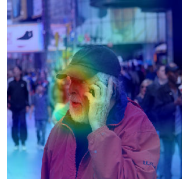

do you see the cell phone ?  
A: yes , but it 's very blurred  
GT: yes

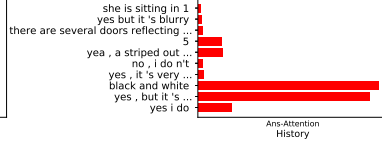

Q: what color is the hat ?  
A: black  
Q: how old is he ?  
A: older man probably in 60 's

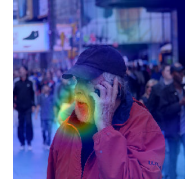

what color is the cell phone ?  
A: black  
GT: black

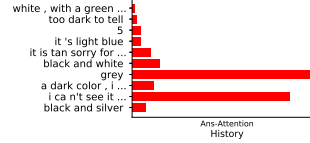

Q: what color is the hat ?  
A: black  
Q: how old is he ?  
A: older man probably in 60 's  
Q: do you see the cell phone ?  
A: yes

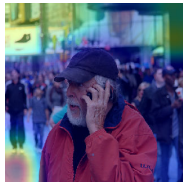

is it inside or outside ?  
A: outside  
GT: outside

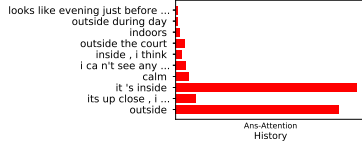

Q: what color is the hat ?  
A: black  
Q: how old is he ?  
A: older man probably in 60 's  
Q: do you see the cell phone ?  
A: yes  
Q: what color is the cell phone ?  
A: black

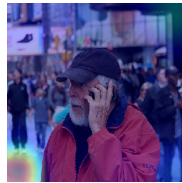

do you see the sky ?  
A: yes  
GT: no

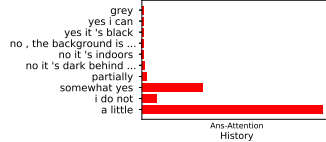

Q: what color is the hat ?  
A: black  
Q: how old is he ?  
A: older man probably in 60 's  
Q: do you see the cell phone ?  
A: yes  
Q: what color is the cell phone ?  
A: black  
Q: is it inside or outside ?  
A: outside

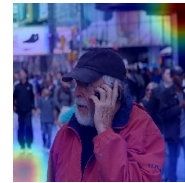

is it sunny ?  
A: yes  
GT: yes

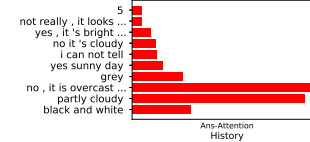

Q: what color is the hat ?  
A: black  
Q: how old is he ?  
A: older man probably in 60 's  
Q: do you see the cell phone ?  
A: yes  
Q: what color is the cell phone ?  
A: black  
Q: is it inside or outside ?  
A: outside  
Q: do you see the sky ?  
A: no

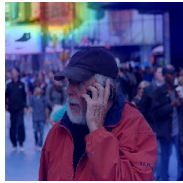

do you see a tree ?  
A: no  
GT: no

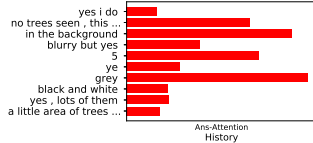

Q: what color is the hat ?  
A: black  
Q: how old is he ?  
A: older man probably in 60 's  
Q: do you see the cell phone ?  
A: yes  
Q: what color is the cell phone ?  
A: black  
Q: is it inside or outside ?  
A: outside  
Q: do you see the sky ?  
A: no  
Q: is it sunny ?  
A: yes

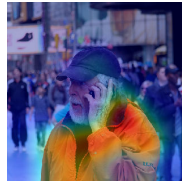

what color clothing he wearing ?  
A: black and white  
GT: orange

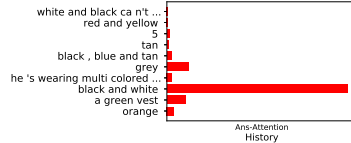

Q: what color is the hat ?  
A: black  
Q: how old is he ?  
A: older man probably in 60 's  
Q: do you see the cell phone ?  
A: yes  
Q: what color is the cell phone ?  
A: black  
Q: is it inside or outside ?  
A: outside  
Q: do you see the sky ?  
A: no  
Q: is it sunny ?  
A: yes  
Q: do you see a tree ?  
A: no

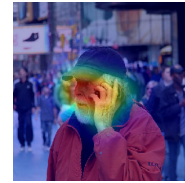

is he wearing glasses ?  
A: no  
GT: no

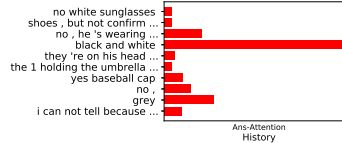

Q: what color is the hat ?  
A: black  
Q: how old is he ?  
A: older man probably in 60 's  
Q: do you see the cell phone ?  
A: yes  
Q: what color is the cell phone ?  
A: black  
Q: is it inside or outside ?  
A: outside  
Q: do you see the sky ?  
A: no  
Q: is it sunny ?  
A: yes  
Q: do you see a tree ?  
A: no  
Q: what color clothing he wearing ?  
A: orange

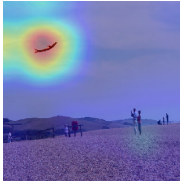

is the picture in color ?  
A: yes  
GT: yes

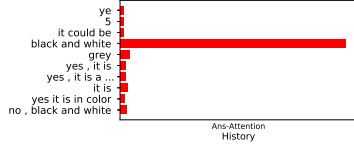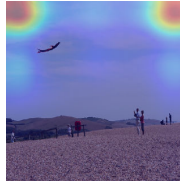

is it sunny ?  
A: yes  
GT: yes

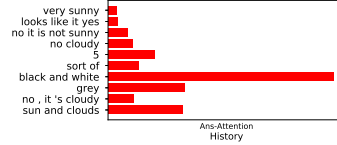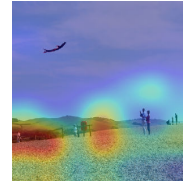

are the kites very high ?  
A: yes  
GT: yes

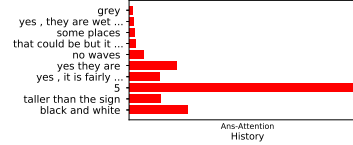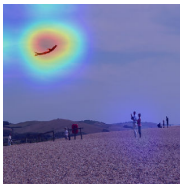

are the kites colorful ?  
A: yes  
GT: yes

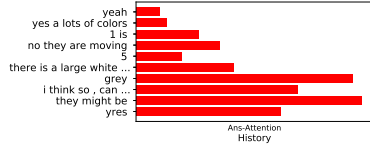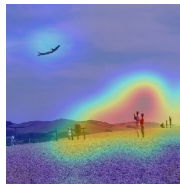

do the people look small ?  
A: yes  
GT: no to small

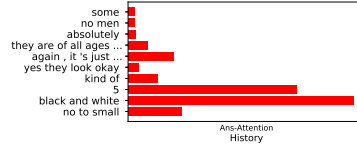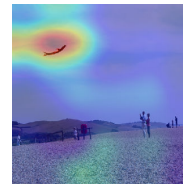

do the kites have tails ?  
A: yes  
GT: yes

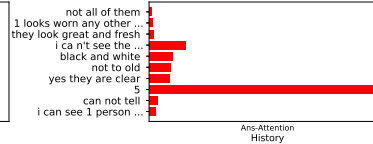

Q: is the picture in color ?  
A: yes  
Q: is it sunny ?  
A: yes  
Q: are the kites very high ?  
A: yes

Q: is the picture in color ?  
A: yes  
Q: is it sunny ?  
A: yes  
Q: are the kites very high ?  
A: yes  
Q: are the kites colorful ?  
A: yes

Q: is the picture in color ?  
A: yes  
Q: is it sunny ?  
A: yes  
Q: are the kites very high ?  
A: yes  
Q: are the kites colorful ?  
A: yes  
Q: do the people look small ?  
A: no to small

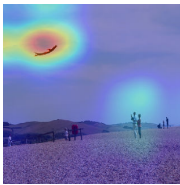

are the kites shaped like animals ?  
A: no  
GT: 1 looks like a fish the other looks round

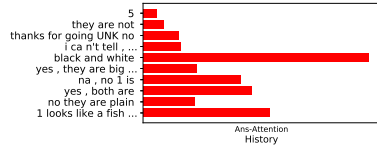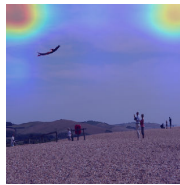

is the sky blue ?  
A: yes  
GT: yes

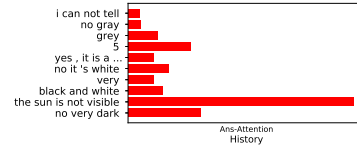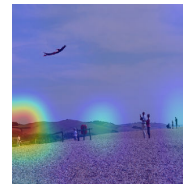

are there vehicles around ?  
A: no  
GT: no

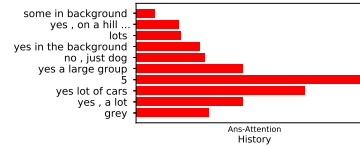

Q: is the picture in color ?  
A: yes  
Q: is it sunny ?  
A: yes  
Q: are the kites very high ?  
A: yes  
Q: are the kites colorful ?  
A: yes  
Q: do the people look small ?  
A: no to small  
Q: do the kites have tails ?  
A: yes

Q: is the picture in color ?  
A: yes  
Q: is it sunny ?  
A: yes  
Q: are the kites very high ?  
A: yes  
Q: are the kites colorful ?  
A: yes  
Q: do the people look small ?  
A: no to small  
Q: do the kites have tails ?  
A: yes  
Q: are the kites shaped like animals ?  
A: 1 looks like a fish the other looks round

Q: is the picture in color ?  
A: yes  
Q: is it sunny ?  
A: yes  
Q: are the kites very high ?  
A: yes  
Q: are the kites colorful ?  
A: yes  
Q: do the people look small ?  
A: no to small  
Q: do the kites have tails ?  
A: yes  
Q: are the kites shaped like animals ?  
A: 1 looks like a fish the other looks round  
Q: is the sky blue ?  
A: yes  
Q: are there clouds ?  
A: yes



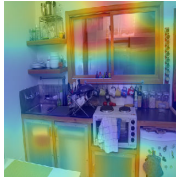

is this a modern kitchen ?  
A: yes  
GT: no

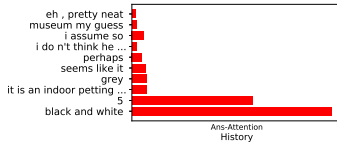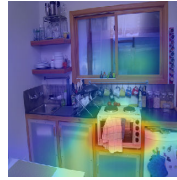

can you see the burners ?  
A: yes  
GT: yes

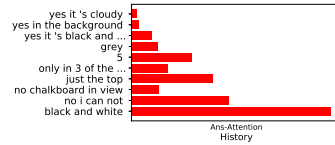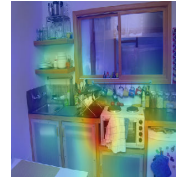

Q: are there any pots on the stove ?  
A: no  
GT: yes

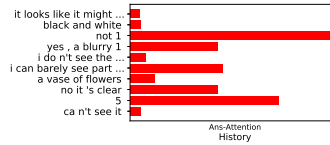

Q: is this a modern kitchen ?  
A: no  
Q: can you see the burners ?  
A: yes  
Q: gas or electric ?  
A: electric

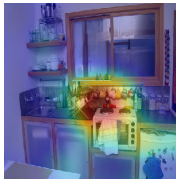

what are they cooking ?  
A: nothing  
GT: nothing

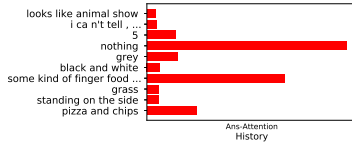

Q: is this a modern kitchen ?  
A: no  
Q: can you see the burners ?  
A: yes  
Q: gas or electric ?  
A: electric  
Q: are there any pots on the stove ?  
A: yes

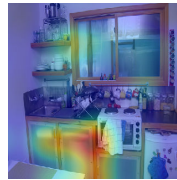

Q: does the stove have big knobs ,old style ?  
A: it's not modern really small 2 burner  
GT: it's not modern really small 2 burner

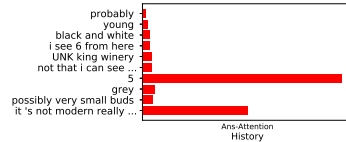

Q: is this a modern kitchen ?  
A: no  
Q: can you see the burners ?  
A: yes  
Q: gas or electric ?  
A: electric  
Q: are there any pots on the stove ?  
A: yes  
Q: what are they cooking ?  
A: nothing

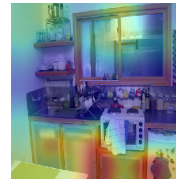

is the range top clean looking ?  
A: yes  
GT: yes

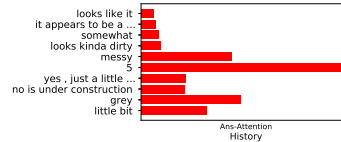

Q: is this a modern kitchen ?  
A: no  
Q: can you see the burners ?  
A: yes  
Q: gas or electric ?  
A: electric  
Q: are there any pots on the stove ?  
A: yes  
Q: what are they cooking ?  
A: nothing  
Q: does the stove have big knobs ,old style ?  
A: it's not modern really small 2 burner

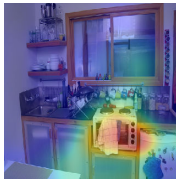

can you see the oven door ?  
A: yes  
GT: yes

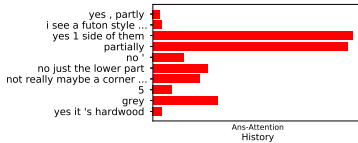

Q: is this a modern kitchen ?  
A: no  
Q: can you see the burners ?  
A: yes  
Q: gas or electric ?  
A: electric  
Q: are there any pots on the stove ?  
A: yes  
Q: what are they cooking ?  
A: nothing  
Q: does the stove have big knobs ,old style ?  
A: it's not modern really small 2 burner  
Q: is the range top clean looking ?  
A: yes

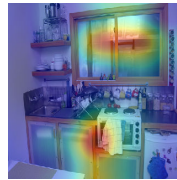

Q: is there a glass window in it ?  
A: yes  
GT: yes

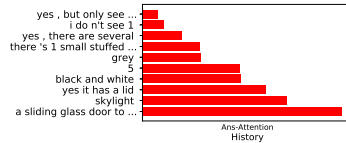

Q: is this a modern kitchen ?  
A: no  
Q: can you see the burners ?  
A: yes  
Q: gas or electric ?  
A: electric  
Q: are there any pots on the stove ?  
A: yes  
Q: what are they cooking ?  
A: nothing  
Q: does the stove have big knobs ,old style ?  
A: it's not modern really small 2 burner  
Q: is the range top clean looking ?  
A: yes  
Q: can you see the oven door ?  
A: yes

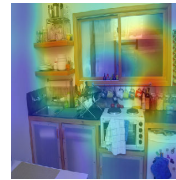

Q: can you see beyond the oven stove ?  
A: no, only the fridge  
GT: no

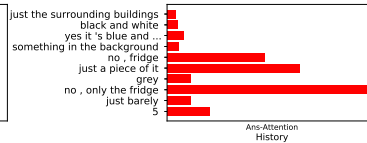

Q: is this a modern kitchen ?  
A: no  
Q: can you see the burners ?  
A: yes  
Q: gas or electric ?  
A: electric  
Q: are there any pots on the stove ?  
A: yes  
Q: what are they cooking ?  
A: nothing  
Q: does the stove have big knobs ,old style ?  
A: it's not modern really small 2 burner  
Q: is the range top clean looking ?  
A: yes  
Q: can you see the oven door ?  
A: yes  
Q: is there a glass window in it ?  
A: yes

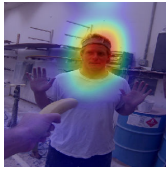

how old is he ?  
A: around 30 years  
GT: early 40s

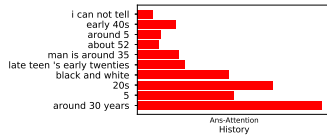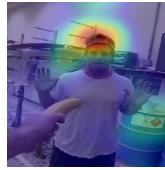

is he eating the banana ?  
A: no another person is holding the banana like a gun  
GT: no another person is holding the banana like a gun

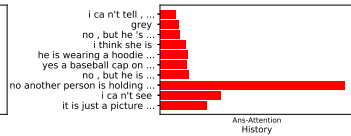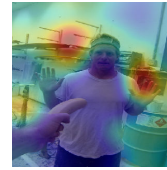

is it ripe ?  
A: yes  
GT: sure

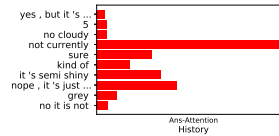

Q: how old is he ?

A: early 40s

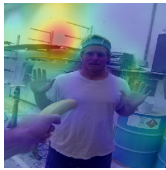

is the bananas green or yellow ?  
A: yellow and green  
GT: yellow

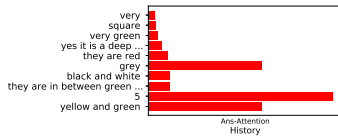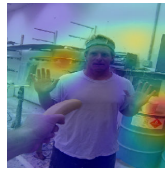

Q: so there is another man as well ?  
A: yes  
GT: just his hand is showing

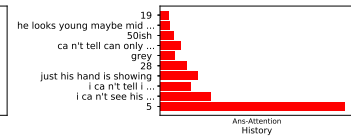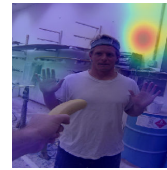

UNK where is this ?  
A: looks like a surfboard paint shop  
GT: looks like a surfboard paint shop

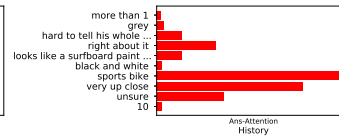

Q: how old is he ?

A: early 40s

Q: is he eating the banana ?

A: no another person is holding the banana like a gun

Q: is it ripe ?

A: sure

Q: how old is he ?

A: early 40s

Q: is he eating the banana ?

A: no another person is holding the banana like a gun

Q: is it ripe ?

A: sure

Q: is the bananas green or yellow ?

A: yellow

Q: how old is he ?

A: early 40s

Q: is he eating the banana ?

A: no another person is holding the banana like a gun

Q: is it ripe ?

A: sure

Q: is the bananas green or yellow ?

A: yellow

Q: so there is another man as well ?

A: just his hand is showing

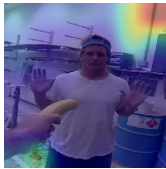

so it's indoors ?  
A: yes  
GT: yes

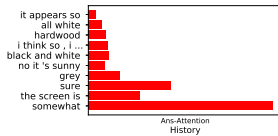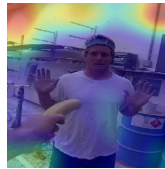

is the place well lit ?  
A: decently  
GT: yes

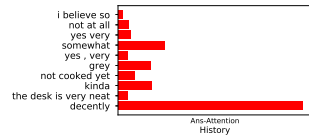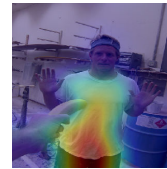

what is he wearing ?  
A: t shirt and probably shorts  
GT: t shirt and probably shorts

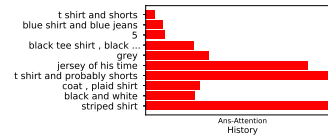

Q: how old is he ?

A: early 40s

Q: is he eating the banana ?

A: no another person is holding the banana like a gun

Q: is it ripe ?

A: sure

Q: is the bananas green or yellow ?

A: yellow

Q: so there is another man as well ?

A: just his hand is showing

Q: UNK where is this ?

A: looks like a surfboard paint shop

Q: how old is he ?

A: early 40s

Q: is he eating the banana ?

A: no another person is holding the banana like a gun

Q: is it ripe ?

A: sure

Q: is the bananas green or yellow ?

A: yellow

Q: so there is another man as well ?

A: just his hand is showing

Q: UNK where is this ?

A: looks like a surfboard paint shop

Q: so it's indoors ?

A: yes

Q: how old is he ?

A: early 40s

Q: is he eating the banana ?

A: no another person is holding the banana like a gun

Q: is it ripe ?

A: sure

Q: is the bananas green or yellow ?

A: yellow

Q: so there is another man as well ?

A: just his hand is showing

Q: UNK where is this ?

A: looks like a surfboard paint shop

Q: so it's indoors ?

A: yes

Q: is the man wearing any glasses ?

A: no

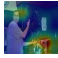

Q: do you think there is another person near him that he is UNK with ?  
A: not really but i don't think so  
GT: yes, definitely

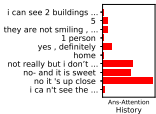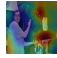

Q: are there a lot of pots and pans ?  
A: at least 5  
GT: there are 3 of them

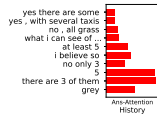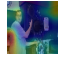

Q: are they sitting on a surface or UNK up ?  
A: hanging on the wall  
GT: hanging on the wall

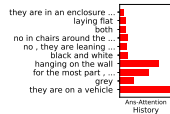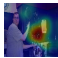

can you see a stove ?  
A: there might be 1 behind the man but i ca n't see enough to say for sure  
GT: there might be 1 behind the man but i ca n't see enough to say for sure

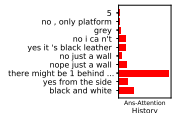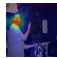

is the man old or young ?  
A: about mid-30s  
GT: about mid-30s

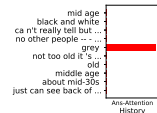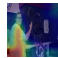

can you see the floor ?  
A: yes  
GT: no

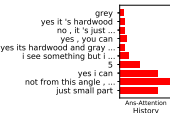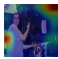

what color is the wall ?  
A: it is white  
GT: black

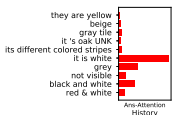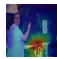

do you see an decorations ?  
A: the pots and pans are used as decorations along with hanging utensils and cutting boards  
GT: the pots and pans are used as decorations along with hanging utensils and cutting boards

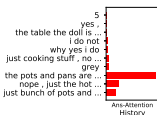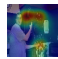

Q: does he have large spoons UNK too ?  
A: yes, definitely  
GT: yes, definitely

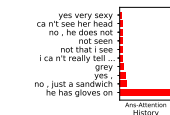

Q: do you think there is another person near him that he is UNK with ?  
A: yes, definitely  
Q: are there a lot of pots and pans ?  
A: there are 3 of them  
Q: are they sitting on a surface or UNK up ?  
A: hanging on the wall  
Q: can you see a stove ?  
A: there might be 1 behind the man but i ca n't see enough to say for sure  
Q: is the man old or young ?  
A: about mid-30s  
Q: can you see the floor ?  
A: no

Q: do you think there is another person near him that he is UNK with ?  
A: yes, definitely  
Q: are there a lot of pots and pans ?  
A: there are 3 of them  
Q: are they sitting on a surface or UNK up ?  
A: hanging on the wall  
Q: can you see a stove ?  
A: there might be 1 behind the man but i ca n't see enough to say for sure  
Q: is the man old or young ?  
A: about mid-30s  
Q: can you see the floor ?  
A: no  
Q: what color is the wall ?  
A: black

Q: do you think there is another person near him that he is UNK with ?  
A: yes, definitely  
Q: are there a lot of pots and pans ?  
A: there are 3 of them  
Q: are they sitting on a surface or UNK up ?  
A: hanging on the wall  
Q: can you see a stove ?  
A: there might be 1 behind the man but i ca n't see enough to say for sure  
Q: is the man old or young ?  
A: about mid-30s  
Q: can you see the floor ?  
A: no  
Q: what color is the wall ?  
A: black  
Q: do you see an decorations ?  
A: the pots and pans are used as decorations along with hanging utensils and cutting boards  
Q: is the room well-lit ?  
A: yes

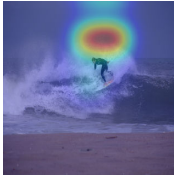

age range ?  
A: ca n't tell  
GT: ca n't see his face close , but he looks young

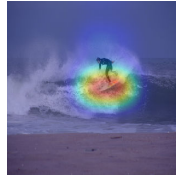

color of board ?  
A: white  
GT: white , orange , yellow , green

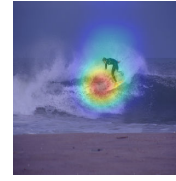

he wearing a wetsuit ?  
A: yes  
GT: yes

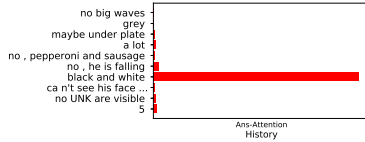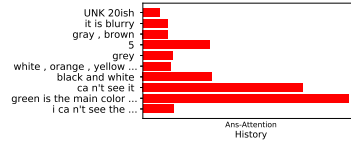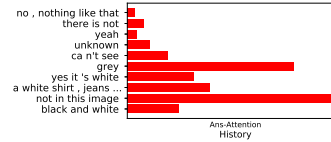

Q: age range ?  
A: ca n't see his face close ,but he looks young  
Q: color of board ?  
A: white ,orange ,yellow ,green  
Q: are the waves big ?  
A: yes

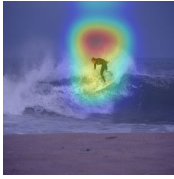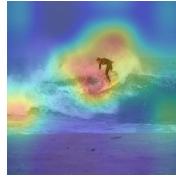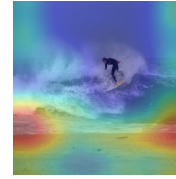

is it black ?  
A: yes  
GT: yes

any other people ?  
A: no  
GT: no

can you see the beach ?  
A: no  
GT: yes

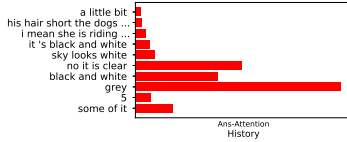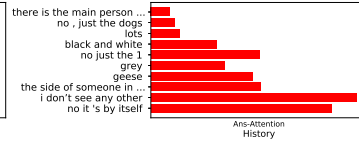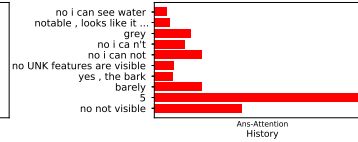

Q: age range ?  
A: ca n't see his face close ,but he looks young  
Q: color of board ?  
A: white ,orange ,yellow ,green  
Q: are the waves big ?  
A: yes  
Q: he wearing a wetsuit ?  
A: yes

Q: age range ?  
A: ca n't see his face close ,but he looks young  
Q: color of board ?  
A: white ,orange ,yellow ,green  
Q: are the waves big ?  
A: yes  
Q: he wearing a wetsuit ?  
A: yes  
Q: is it black ?  
A: yes

Q: age range ?  
A: ca n't see his face close ,but he looks young  
Q: color of board ?  
A: white ,orange ,yellow ,green  
Q: are the waves big ?  
A: yes  
Q: he wearing a wetsuit ?  
A: yes  
Q: is it black ?  
A: yes  
Q: any other people ?  
A: no

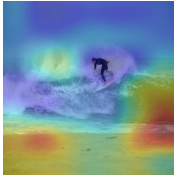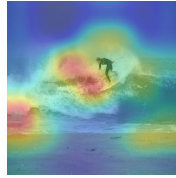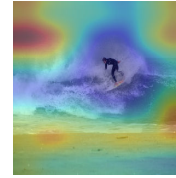

any rock barriers ?  
A: i ca n't see anything but the part of a bush  
GT: no

any chairs ?  
A: no  
GT: no

any buildings ?  
A: no  
GT: no

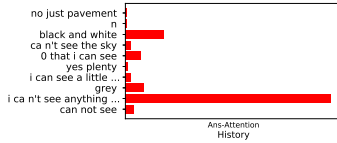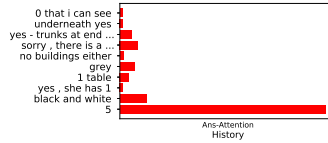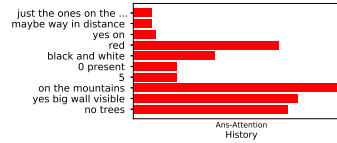

Q: age range ?  
A: ca n't see his face close ,but he looks young  
Q: color of board ?  
A: white ,orange ,yellow ,green  
Q: are the waves big ?  
A: yes  
Q: he wearing a wetsuit ?  
A: yes  
Q: is it black ?  
A: yes  
Q: any other people ?  
A: no  
Q: can you see the beach ?  
A: yes

Q: age range ?  
A: ca n't see his face close ,but he looks young  
Q: color of board ?  
A: white ,orange ,yellow ,green  
Q: are the waves big ?  
A: yes  
Q: he wearing a wetsuit ?  
A: yes  
Q: is it black ?  
A: yes  
Q: any other people ?  
A: no  
Q: can you see the beach ?  
A: yes  
Q: any rock barriers ?  
A: no

Q: age range ?  
A: ca n't see his face close ,but he looks young  
Q: color of board ?  
A: white ,orange ,yellow ,green  
Q: are the waves big ?  
A: yes  
Q: he wearing a wetsuit ?  
A: yes  
Q: is it black ?  
A: yes  
Q: any other people ?  
A: no  
Q: can you see the beach ?  
A: yes  
Q: any rock barriers ?  
A: no  
Q: any chairs ?  
A: no

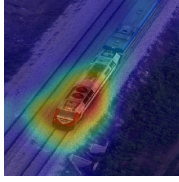

is this a passenger train ?  
A: yes  
GT: i think so

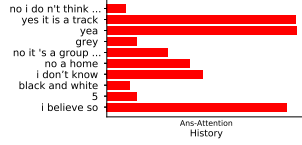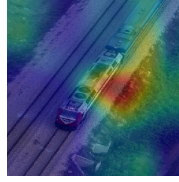

does the train have windows ?  
A: i can only see it 's butt  
GT: i think it does , picture is from serial

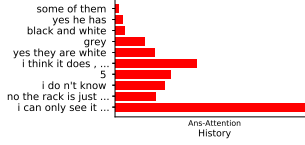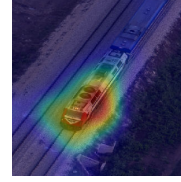

what color is the train ?  
A: grey  
GT: aerial position white , blue , red

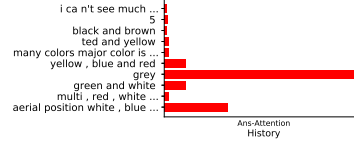

Q: is this a passenger train ?  
A: i think so  
Q: does the train have windows ?  
A: i think it does , picture is from serial

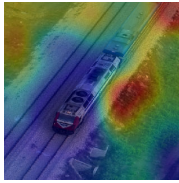

can you see any buildings ?  
A: no  
GT: no

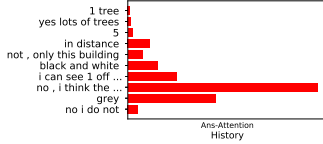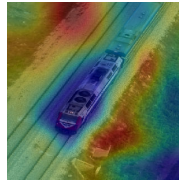

is there gravel on the tracks ?  
A: yes  
GT: lots of UNK

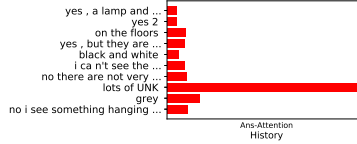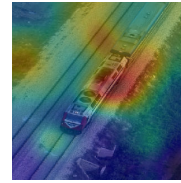

is the train at the station ?  
A: no , traveling  
GT: no , traveling

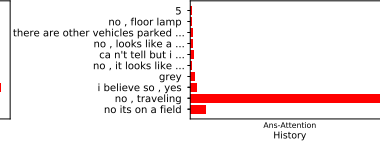

Q: is this a passenger train ?  
A: i think so  
Q: does the train have windows ?  
A: i think it does , picture is from serial  
Q: what color is the train ?  
A: aerial position white , blue , red

Q: is this a passenger train ?  
A: i think so  
Q: does the train have windows ?  
A: i think it does , picture is from serial  
Q: what color is the train ?  
A: aerial position white , blue , red  
Q: can you see any buildings ?  
A: no  
Q: are there any trees ?  
A: no

Q: is this a passenger train ?  
A: i think so  
Q: does the train have windows ?  
A: i think it does , picture is from serial  
Q: what color is the train ?  
A: aerial position white , blue , red  
Q: can you see any buildings ?  
A: no  
Q: are there any trees ?  
A: no  
Q: is there gravel on the tracks ?  
A: lots of UNK

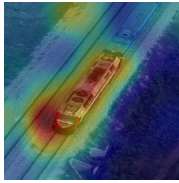

Q: does it look like it is in motion ?  
A: yes  
GT: not really

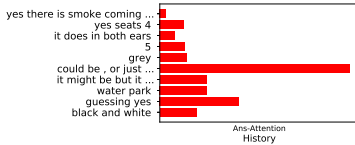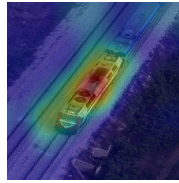

can you see any people ?  
A: no  
GT: no

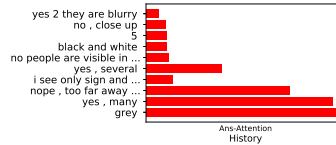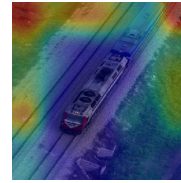

is it daytime ?  
A: yes  
GT: it is daytime

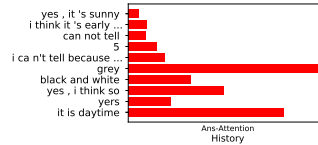

Q: is this a passenger train ?  
A: i think so  
Q: does the train have windows ?  
A: i think it does , picture is from serial  
Q: what color is the train ?  
A: aerial position white , blue , red  
Q: can you see any buildings ?  
A: no  
Q: are there any trees ?  
A: no  
Q: is there gravel on the tracks ?  
A: lots of UNK  
Q: is the train at the station ?  
A: no , traveling

Q: is this a passenger train ?  
A: i think so  
Q: does the train have windows ?  
A: i think it does , picture is from serial  
Q: what color is the train ?  
A: aerial position white , blue , red  
Q: can you see any buildings ?  
A: no  
Q: are there any trees ?  
A: no  
Q: is there gravel on the tracks ?  
A: lots of UNK  
Q: is the train at the station ?  
A: no , traveling  
Q: does it look like it is in motion ?  
A: not really

Q: is this a passenger train ?  
A: i think so  
Q: does the train have windows ?  
A: i think it does , picture is from serial  
Q: what color is the train ?  
A: aerial position white , blue , red  
Q: can you see any buildings ?  
A: no  
Q: are there any trees ?  
A: no  
Q: is there gravel on the tracks ?  
A: lots of UNK  
Q: is the train at the station ?  
A: no , traveling  
Q: does it look like it is in motion ?  
A: not really  
Q: can you see any people ?  
A: no



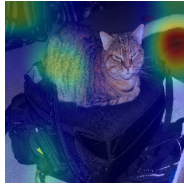

is this in color ?  
A: yes  
GT: yes

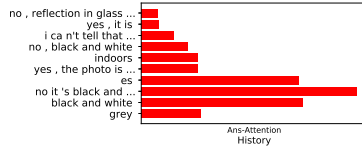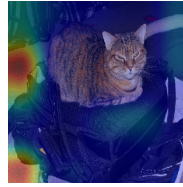

is the floor carpeted ?  
A: yes  
GT: yes

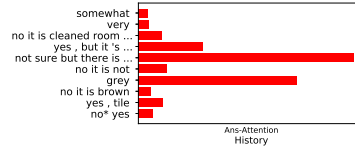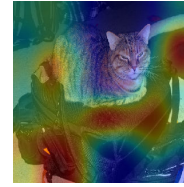

is the bag plastic ?  
A: yes  
GT: no, appears to be nylon

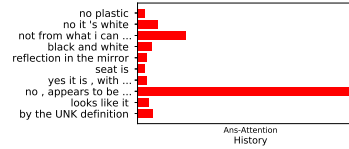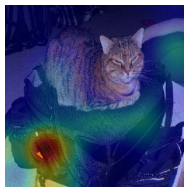

what color is the bag ?  
A: black and white  
GT: black

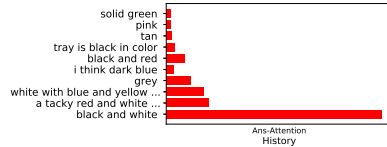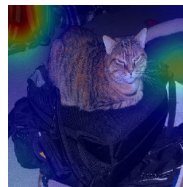

are there any people ?  
A: i can only see feet  
GT: no

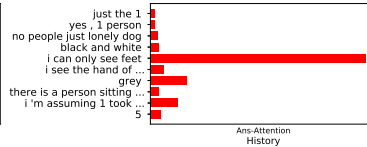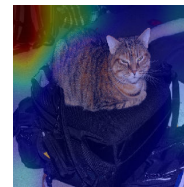

is this a living room ?  
A: no  
GT: no sure

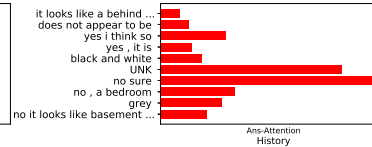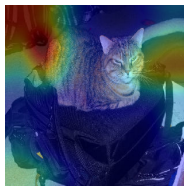

is this a close up ?  
A: yes  
GT: mostly

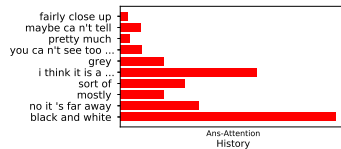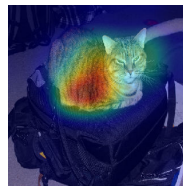

what color is the cat ?  
A: grey  
GT: tabby brown

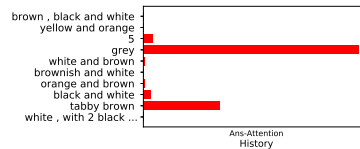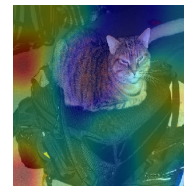

is the cat sleeping ?  
A: no  
GT: almost

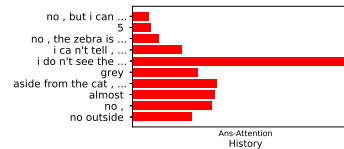

Q: is this in color ?  
A: yes  
Q: is the floor carpeted ?  
A: yes  
Q: is the bag plastic ?  
A: no, appears to be nylon  
Q: what color is the bag ?  
A: black  
Q: what color is the carpet ?  
A: tan  
Q: are there any people ?  
A: no  
Q: is this a living room ?  
A: no sure

Q: is this in color ?  
A: yes  
Q: is the floor carpeted ?  
A: yes  
Q: is the bag plastic ?  
A: no, appears to be nylon  
Q: what color is the bag ?  
A: black  
Q: what color is the carpet ?  
A: tan  
Q: are there any people ?  
A: no  
Q: is this a living room ?  
A: no sure  
Q: is this a close up ?  
A: mostly

Q: is this in color ?  
A: yes  
Q: is the floor carpeted ?  
A: yes  
Q: is the bag plastic ?  
A: no, appears to be nylon  
Q: what color is the bag ?  
A: black  
Q: what color is the carpet ?  
A: tan  
Q: are there any people ?  
A: no  
Q: is this a living room ?  
A: no sure  
Q: is this a close up ?  
A: mostly  
Q: what color is the cat ?  
A: tabby brown

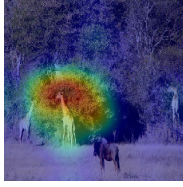

how many zebras are there ?  
A: 3  
GT: 0

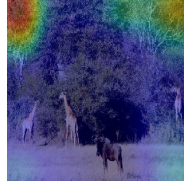

is it sunny ?  
A: yes  
GT: yes

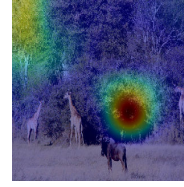

are there trees ?  
A: yes  
GT: yes

the sandwiches are cut into ...  
they are all shredded  
5  
grey  
about 20  
black and white  
about 8  
too many  
i see 4 here  
7

Ans-Attention History

no it looks cloudy  
looks like the sun is ...  
no , very overcast  
yes  
sort of  
no it 's cloudy  
no , overcast  
overcast  
cloudy  
partly

Ans-Attention History

black and white  
bushes and flowers  
yes , there are some  
yes i think so  
5  
yes , there are many ...  
no , it is indoors  
i ca n't see any  
grey  
yes in distance

Ans-Attention History

Q: how many zebras are there ?  
A: 0

Q: how many zebras are there ?  
A: 0  
Q: is it sunny ?  
A: yes

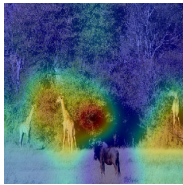

can you see any birds ?  
A: no  
GT: no

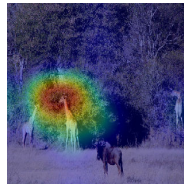

how many wildebeest are there ?  
A: 3  
GT: 4

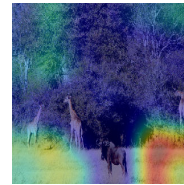

are they in an open field ?  
A: yes  
GT: yes

i see shrubs but not ...  
no trees  
no , i can not  
grey  
i see people 's legs  
they 're more shrubs not ...  
black and white  
nope , but there are ...  
5  
no , no birds

Ans-Attention History

grey  
a whole flock of them ...  
there are 3  
6  
5  
too many to count  
too many to count and ...  
just 1  
black and white  
many different types

Ans-Attention History

yes they are playing in ...  
no i think it 's ...  
5  
they are sitting and some  
black and white  
yes , i think so  
probably  
i do n't think so ...  
i think they are  
grey

Ans-Attention History

Q: how many zebras are there ?  
A: 0  
Q: is it sunny ?  
A: yes  
Q: are there trees ?  
A: yes

Q: how many zebras are there ?  
A: 0  
Q: is it sunny ?  
A: yes  
Q: are there trees ?  
A: yes  
Q: can you see any birds ?  
A: no

Q: how many zebras are there ?  
A: 0  
Q: is it sunny ?  
A: yes  
Q: are there trees ?  
A: yes  
Q: can you see any birds ?  
A: no  
Q: how many wildebeest are there ?  
A: 4

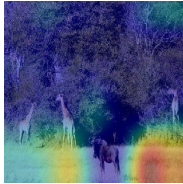

are there any people ?  
A: no  
GT: no

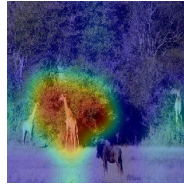

are there any baby animals ?  
A: no  
GT: no

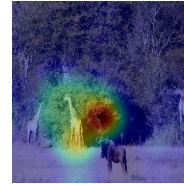

Q: do any of the animals look like they are being UNK ?  
A: no  
GT: no

i see part of 2 ...  
yes 2 men  
no 1  
black and white  
grey  
no , there are no ...  
i can see just a ...  
no people to be seen  
5  
yes , 2

Ans-Attention History

no animals  
maybe in vehicles , but ...  
no just people  
no , just cows  
yes i think olives are ...  
black and white  
a fake horse  
grey  
5  
no there are 0

Ans-Attention History

about half  
summer  
no ca n't tell if ...  
black and white  
mom is holding the little ...  
5  
yes , 1 of them ...  
grey  
he could be  
they don't seem to be ...

Ans-Attention History

Q: how many zebras are there ?  
A: 0  
Q: is it sunny ?  
A: yes  
Q: are there trees ?  
A: yes  
Q: can you see any birds ?  
A: no  
Q: how many wildebeest are there ?  
A: 4  
Q: are they in an open field ?  
A: yes  
Q: is there water nearby ?  
A: no

Q: how many zebras are there ?  
A: 0  
Q: is it sunny ?  
A: yes  
Q: are there trees ?  
A: yes  
Q: can you see any birds ?  
A: no  
Q: how many wildebeest are there ?  
A: 4  
Q: are they in an open field ?  
A: yes  
Q: is there water nearby ?  
A: no  
Q: are there any people ?  
A: no

Q: how many zebras are there ?  
A: 0  
Q: is it sunny ?  
A: yes  
Q: are there trees ?  
A: yes  
Q: can you see any birds ?  
A: no  
Q: how many wildebeest are there ?  
A: 4  
Q: are they in an open field ?  
A: yes  
Q: is there water nearby ?  
A: no  
Q: are there any people ?  
A: no  
Q: are there any baby animals ?  
A: no

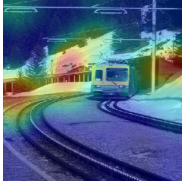

is there people ?  
A: no  
GT: no

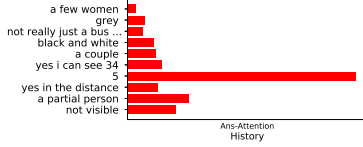

Q: is this in colors ?  
A: yes

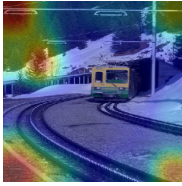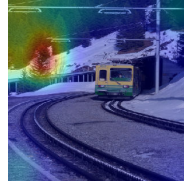

is it daytime ?  
A: yes  
GT: yes

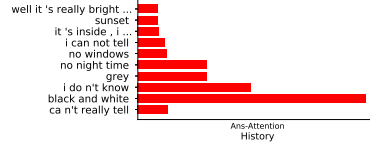

Q: is this in colors ?  
A: yes  
Q: is there people ?  
A: no

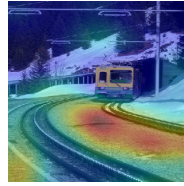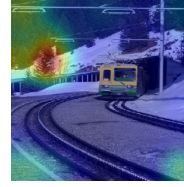

can you see the sky ?  
A: no  
GT: no

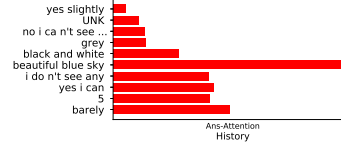

Q: is this in colors ?  
A: yes  
Q: is there people ?  
A: no  
Q: is it daytime ?  
A: yes

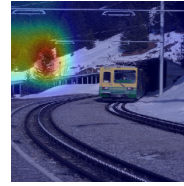

can you see the clouds ?  
A: no  
GT: no

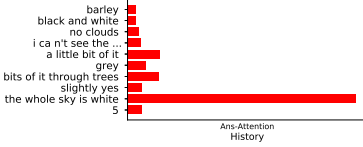

Q: is this in colors ?  
A: yes  
Q: is there people ?  
A: no  
Q: is it daytime ?  
A: yes  
Q: can you see the sky ?  
A: no

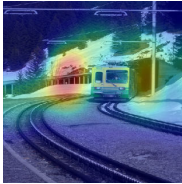

is it snowing ?  
A: no  
GT: yes

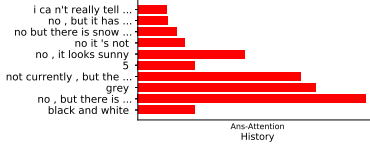

Q: is this in colors ?  
A: yes  
Q: is there people ?  
A: no  
Q: is it daytime ?  
A: yes  
Q: can you see the sky ?  
A: no  
Q: can you see the clouds ?  
A: no

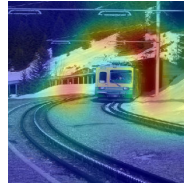

is there trees ?  
A: yes  
GT: yes

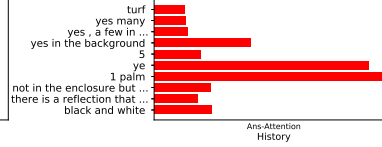

Q: is this in colors ?  
A: yes  
Q: is there people ?  
A: no  
Q: is it daytime ?  
A: yes  
Q: can you see the sky ?  
A: no  
Q: can you see the clouds ?  
A: no  
Q: is it snowing ?  
A: yes

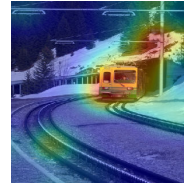

is the train for people ?  
A: no  
GT: yes

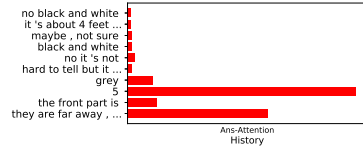

Q: is this in colors ?  
A: yes  
Q: is there people ?  
A: no  
Q: is it daytime ?  
A: yes  
Q: can you see the sky ?  
A: no  
Q: can you see the clouds ?  
A: no  
Q: is it snowing ?  
A: yes  
Q: is there trees ?  
A: yes

is the train going fast ?  
A: no  
GT: do n't know

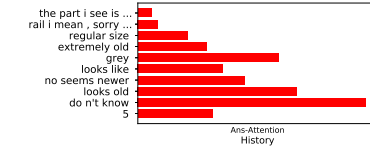

Q: is this in colors ?  
A: yes  
Q: is there people ?  
A: no  
Q: is it daytime ?  
A: yes  
Q: can you see the sky ?  
A: no  
Q: can you see the clouds ?  
A: no  
Q: is it snowing ?  
A: yes  
Q: is there trees ?  
A: yes  
Q: is the train for people ?  
A: yes



is there a number on it ?  
A: no  
GT: no

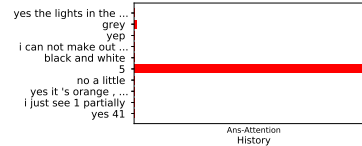

Q: is this in colors ?  
A: yes  
Q: is there people ?  
A: no  
Q: is it daytime ?  
A: yes  
Q: can you see the sky ?  
A: no  
Q: can you see the clouds ?  
A: no  
Q: is it snowing ?  
A: yes  
Q: is there trees ?  
A: yes  
Q: is the train for people ?  
A: yes  
Q: is the train going fast ?  
A: do n't know



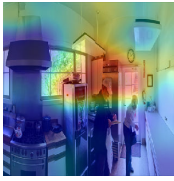

is this a home setting ?  
A: yes  
GT: yes

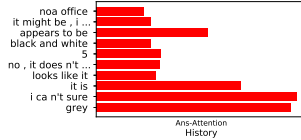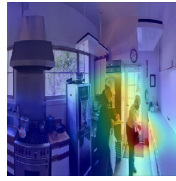

Q: are there any other people in the kitchen ?  
A: no  
GT: no

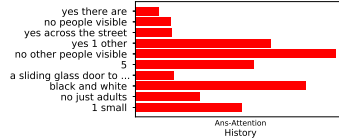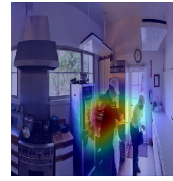

are the men young or older ?  
A: middle aged  
GT: old maybe 60s

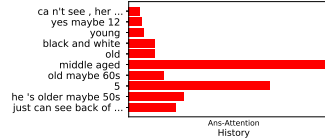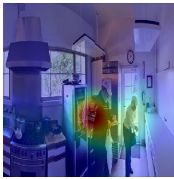

are they laughing or talking ?  
A: ca n't tell  
GT: neither just standing

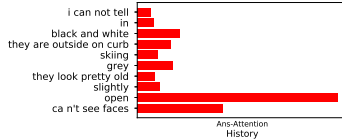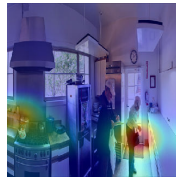

are they eating or drinking anything ?  
A: no  
GT: no

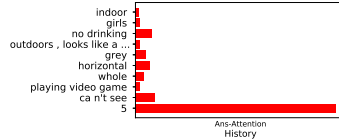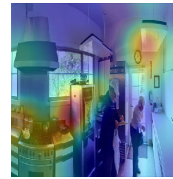

what color are the appliances ?  
A: grey  
GT: gray

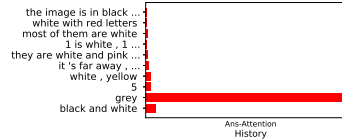

Q: is this a home setting ?  
A: yes  
Q: are there any other people in the kitchen ?  
A: no  
Q: are the men young or older ?  
A: old maybe 60s

Q: is this a home setting ?  
A: yes  
Q: are there any other people in the kitchen ?  
A: no  
Q: are the men young or older ?  
A: old maybe 60s  
Q: are they laughing or talking ?  
A: neither just standing

Q: is this a home setting ?  
A: yes  
Q: are there any other people in the kitchen ?  
A: no  
Q: are the men young or older ?  
A: old maybe 60s  
Q: are they laughing or talking ?  
A: neither just standing  
Q: are they eating or drinking anything ?  
A: no

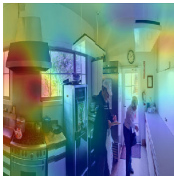

Q: does the kitchen look modern or outdated ?  
A: outdated  
GT: outdated

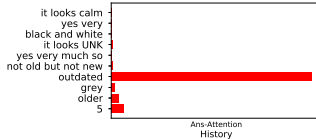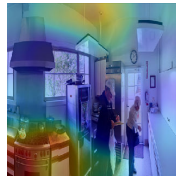

what color are the cabinets ?  
A: grey  
GT: brown and white

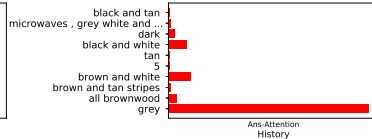

Q: is this a home setting ?  
A: yes  
Q: are there any other people in the kitchen ?  
A: no  
Q: are the men young or older ?  
A: old maybe 60s  
Q: are they laughing or talking ?  
A: neither just standing  
Q: are they eating or drinking anything ?  
A: no  
Q: what color are the appliances ?  
A: gray

Q: is this a home setting ?  
A: yes  
Q: are there any other people in the kitchen ?  
A: no  
Q: are the men young or older ?  
A: old maybe 60s  
Q: are they laughing or talking ?  
A: neither just standing  
Q: are they eating or drinking anything ?  
A: no  
Q: what color are the appliances ?  
A: gray  
Q: does the kitchen look modern or outdated ?  
A: outdated  
Q: are there any windows ?  
A: yes about 2

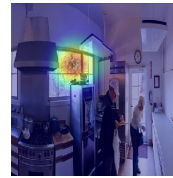

any plants in the windows ?  
A: yes  
GT: no

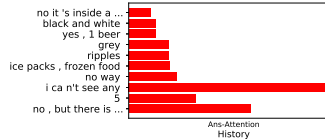

Q: is this a home setting ?  
A: yes  
Q: are there any other people in the kitchen ?  
A: no  
Q: are the men young or older ?  
A: old maybe 60s  
Q: are they laughing or talking ?  
A: neither just standing  
Q: are they eating or drinking anything ?  
A: no  
Q: what color are the appliances ?  
A: gray  
Q: does the kitchen look modern or outdated ?  
A: outdated  
Q: are there any windows ?  
A: yes about 2  
Q: what color are the cabinets ?  
A: brown and white

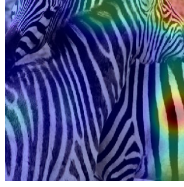

is it daytime ?  
A: yes  
GT: yes

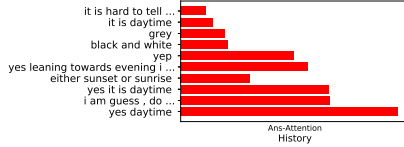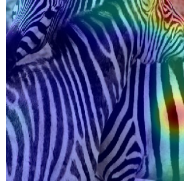

is the sun shining ?  
A: yes  
GT: yes

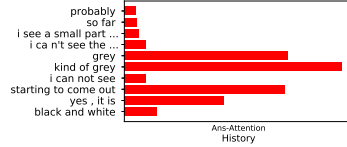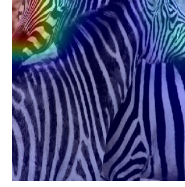

is the photo in color ?  
A: black and white  
GT: yes

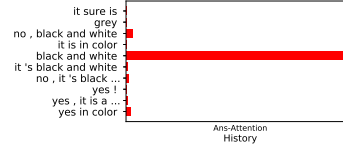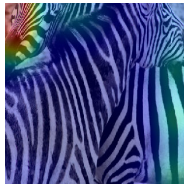

are they standing on dirt ?  
A: black and white  
GT: yes

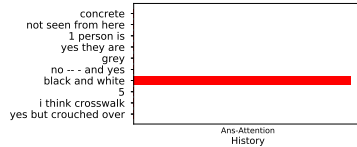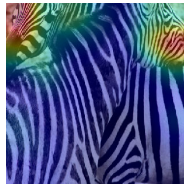

Q: are they the only 2 animals you see ?  
A: yes  
GT: yes

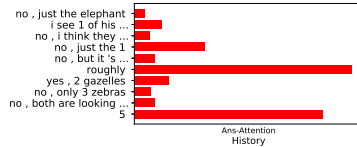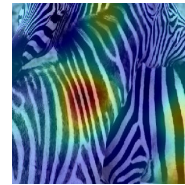

Q: do they appear to be in captivity ?  
A: yes  
GT: no

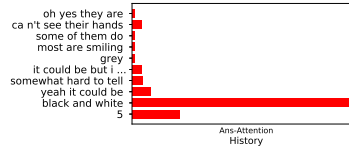

Q: is it daytime ?  
A: yes  
Q: is the sun shining ?  
A: yes  
Q: is the photo in color ?  
A: yes  
Q: are they standing on green grass ?  
A: no

Q: is it daytime ?  
A: yes  
Q: is the sun shining ?  
A: yes  
Q: is the photo in color ?  
A: yes  
Q: are they standing on green grass ?  
A: no  
Q: are they standing on dirt ?  
A: yes

Q: is it daytime ?  
A: yes  
Q: is the sun shining ?  
A: yes  
Q: is the photo in color ?  
A: yes  
Q: are they standing on green grass ?  
A: no  
Q: are they standing on dirt ?  
A: yes  
Q: are they the only 2 animals you see ?  
A: yes

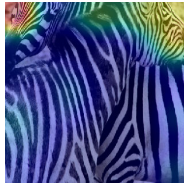

are there trees visible ?  
A: no  
GT: no

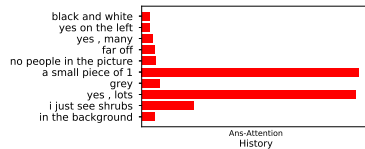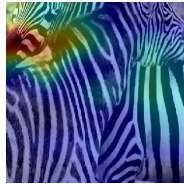

Q: do both zebras appear to be adults ?  
A: yes  
GT: yes

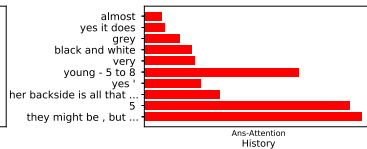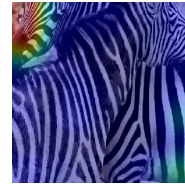

Q: is there any water in the picture ?  
A: no  
GT: no

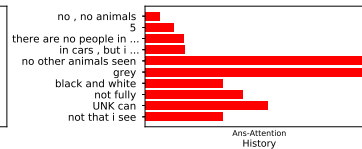

Q: is it daytime ?  
A: yes  
Q: is the sun shining ?  
A: yes  
Q: is the photo in color ?  
A: yes  
Q: are they standing on green grass ?  
A: no  
Q: are they standing on dirt ?  
A: yes  
Q: are they the only 2 animals you see ?  
A: yes  
Q: do they appear to be in captivity ?  
A: no

Q: is it daytime ?  
A: yes  
Q: is the sun shining ?  
A: yes  
Q: is the photo in color ?  
A: yes  
Q: are they standing on green grass ?  
A: no  
Q: are they standing on dirt ?  
A: yes  
Q: are they the only 2 animals you see ?  
A: yes  
Q: do they appear to be in captivity ?  
A: no  
Q: are there trees visible ?  
A: no

Q: is it daytime ?  
A: yes  
Q: is the sun shining ?  
A: yes  
Q: is the photo in color ?  
A: yes  
Q: are they standing on green grass ?  
A: no  
Q: are they standing on dirt ?  
A: yes  
Q: are they the only 2 animals you see ?  
A: yes  
Q: do they appear to be in captivity ?  
A: no  
Q: are there trees visible ?  
A: no  
Q: do both zebras appear to be adults ?  
A: yes



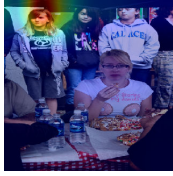

what color is her hair ?  
A: blonde  
GT: blonde

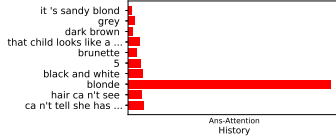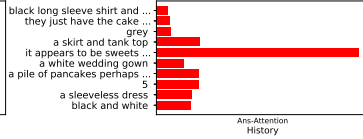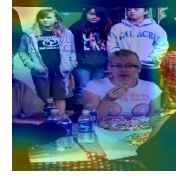

outside or inside pic ?  
A: i think it 's inside  
GT: outside

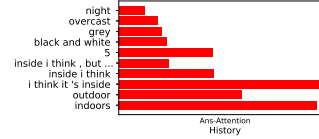

Q: what color is her hair ?

A: blonde

Q: what color is her hair ?

A: blonde

Q: what is she eating ?

A: it appears to be sweets ,dessert of some sort

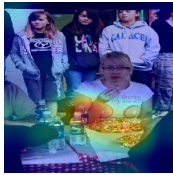

cake ?  
A: no  
GT: no

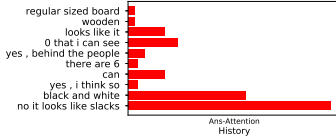

Q: what color is her hair ?

A: blonde

Q: what is she eating ?

A: it appears to be sweets ,dessert of some sort

Q: outside or inside pic ?

A: outside

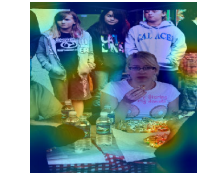

is she at cafe ?  
A: possibly , hard to identify  
GT: possibly , hard to identify

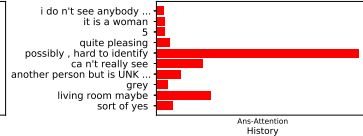

Q: what color is her hair ?

A: blonde

Q: what is she eating ?

A: it appears to be sweets ,dessert of some sort

Q: outside or inside pic ?

A: outside

Q: cake ?

A: no

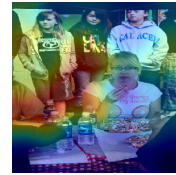

are there waiters ?  
A: no  
GT: no

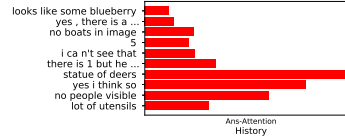

Q: what color is her hair ?

A: blonde

Q: what is she eating ?

A: it appears to be sweets ,dessert of some sort

Q: outside or inside pic ?

A: outside

Q: cake ?

A: no

Q: is she at cafe ?

A: possibly ,hard to identify

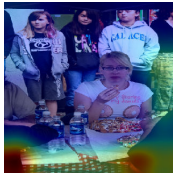

sunny outside or what ?  
A: sunny but cold  
GT: sunny but cold

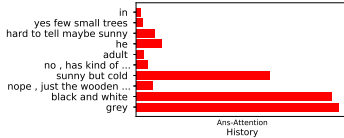

Q: what color is her hair ?

A: blonde

Q: what is she eating ?

A: it appears to be sweets ,dessert of some sort

Q: outside or inside pic ?

A: outside

Q: cake ?

A: no

Q: is she at cafe ?

A: possibly ,hard to identify

Q: are there waiters ?

A: no

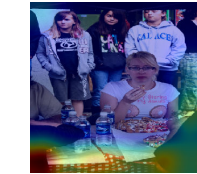

clouds in skies ?  
A: can not see sky  
GT: can not see sky

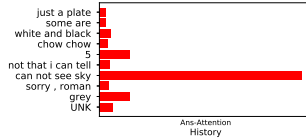

Q: what color is her hair ?

A: blonde

Q: what is she eating ?

A: it appears to be sweets ,dessert of some sort

Q: outside or inside pic ?

A: outside

Q: cake ?

A: no

Q: is she at cafe ?

A: possibly ,hard to identify

Q: are there waiters ?

A: no

Q: sunny outside or what ?

A: sunny but cold

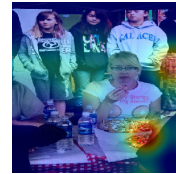

well how cold is it ?  
A: warm  
GT: light sweatshirt weather

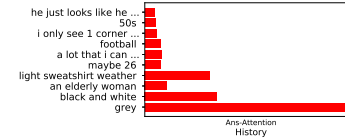

Q: what color is her hair ?

A: blonde

Q: what is she eating ?

A: it appears to be sweets ,dessert of some sort

Q: outside or inside pic ?

A: outside

Q: cake ?

A: no

Q: is she at cafe ?

A: possibly ,hard to identify

Q: are there waiters ?

A: no

Q: sunny outside or what ?

A: sunny but cold

Q: clouds in skies ?

A: can not see sky

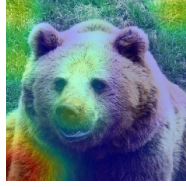

is the image color ?  
A: yes  
GT: yes

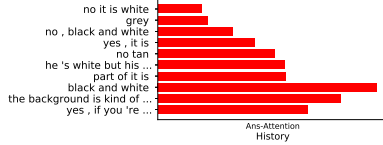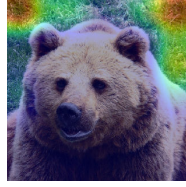

is this outdoors ?  
A: yes  
GT: yes

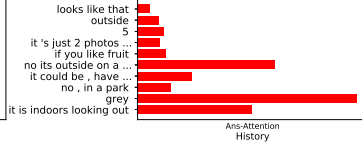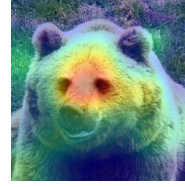

is this a baby bear ?  
A: no  
GT: no

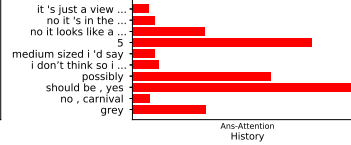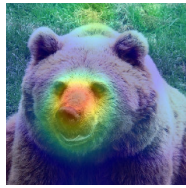

what color are it's eyes ?  
A: black  
GT: black and brown

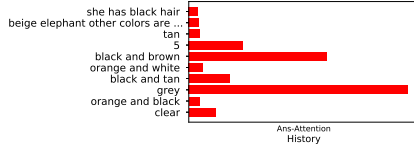

Q: is the image color ?  
A: yes  
Q: is this outdoors ?  
A: yes  
Q: is this a baby bear ?  
A: no

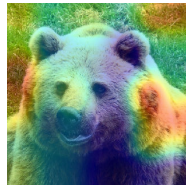

are there other animals ?  
A: no  
GT: only bear

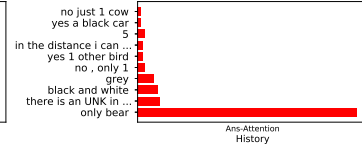

Q: is the image color ?  
A: yes  
Q: is this outdoors ?  
A: yes  
Q: is this a baby bear ?  
A: no  
Q: what color are it's eyes ?  
A: black and brown

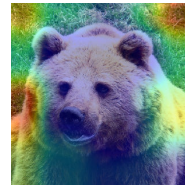

is the bear in the wild ?  
A: no  
GT: yes

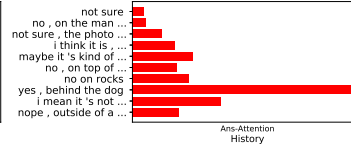

Q: is the image color ?  
A: yes  
Q: is this outdoors ?  
A: yes  
Q: is this a baby bear ?  
A: no  
Q: what color are it's eyes ?  
A: black and brown  
Q: are there other animals ?  
A: only bear

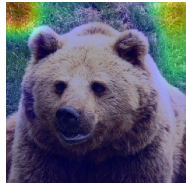

can you see grass ?  
A: yes  
GT: yes

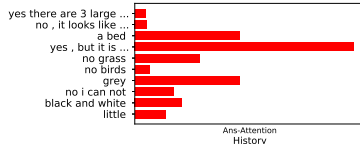

Q: is the image color ?  
A: yes  
Q: is this outdoors ?  
A: yes  
Q: is this a baby bear ?  
A: no  
Q: what color are it's eyes ?  
A: black and brown  
Q: are there other animals ?  
A: only bear  
Q: is the bear in the wild ?  
A: yes  
Q: can you see trees ?  
A: no

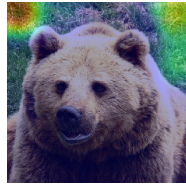

is the grass green ?  
A: yes  
GT: yes

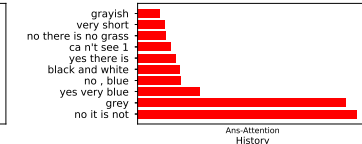

Q: is the image color ?  
A: yes  
Q: is this outdoors ?  
A: yes  
Q: is this a baby bear ?  
A: no  
Q: what color are it's eyes ?  
A: black and brown  
Q: are there other animals ?  
A: only bear  
Q: is the bear in the wild ?  
A: yes  
Q: can you see trees ?  
A: no  
Q: can you see grass ?  
A: yes

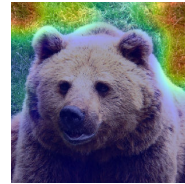

is the grass tall ?  
A: no  
GT: yes

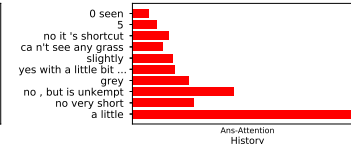

Q: is the image color ?  
A: yes  
Q: is this outdoors ?  
A: yes  
Q: is this a baby bear ?  
A: no  
Q: what color are it's eyes ?  
A: black and brown  
Q: are there other animals ?  
A: only bear  
Q: is the bear in the wild ?  
A: yes  
Q: can you see trees ?  
A: no  
Q: can you see grass ?  
A: yes  
Q: is the grass green ?  
A: yes

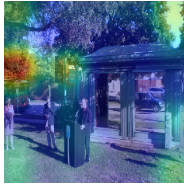

is this in color ?  
A: yes  
GT: yes

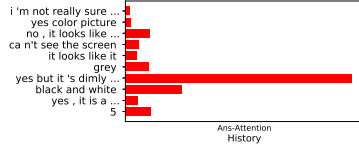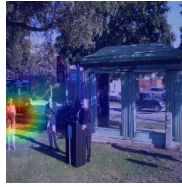

how many people do you see ?  
A: around thirteen  
GT: 3

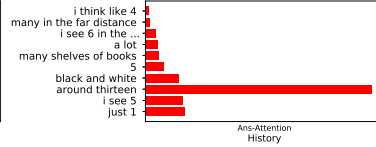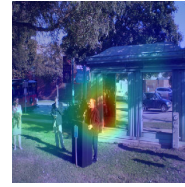

how old does the man look ?  
A: 25  
GT: 25

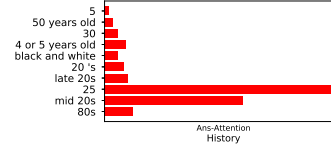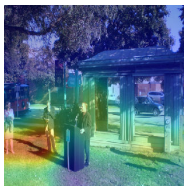

is he behind the podium ?  
A: no  
GT: yes

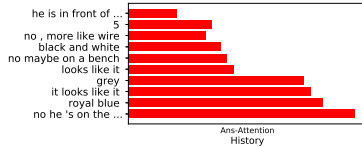

Q: is this in color ?  
A: yes  
Q: how many people do you see ?  
A: 3  
Q: how old does the man look ?  
A: 25

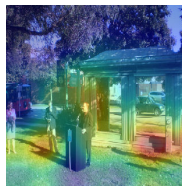

is he on a stage ?  
A: no  
GT: no

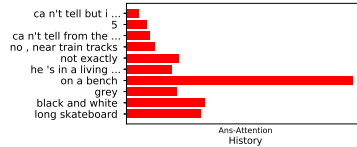

Q: is this in color ?  
A: yes  
Q: how many people do you see ?  
A: 3  
Q: how old does the man look ?  
A: 25  
Q: is he behind the podium ?  
A: yes

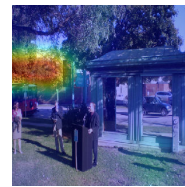

Q: is this a sports park  
or regular park ?  
A: regular park  
GT: regular park

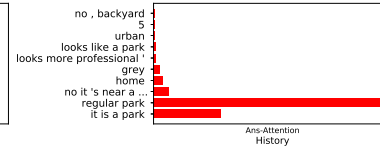

Q: is this in color ?  
A: yes  
Q: how many people do you see ?  
A: 3  
Q: how old does the man look ?  
A: 25  
Q: is he behind the podium ?  
A: yes  
Q: is he on a stage ?  
A: no

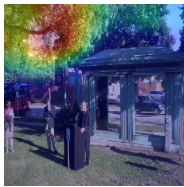

do you see trees ?  
A: yes  
GT: yes

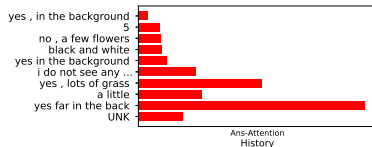

Q: is this in color ?  
A: yes  
Q: how many people do you see ?  
A: 3  
Q: how old does the man look ?  
A: 25  
Q: is he behind the podium ?  
A: yes  
Q: is he on a stage ?  
A: no  
Q: is this a sports park or regular park ?  
A: regular park  
Q: do you see any animals ?  
A: no

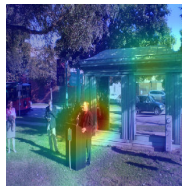

is he speaking into a mic ?  
A: no  
GT: yes

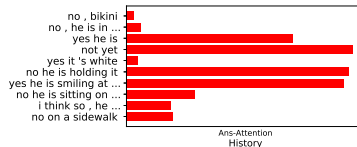

Q: is this in color ?  
A: yes  
Q: how many people do you see ?  
A: 3  
Q: how old does the man look ?  
A: 25  
Q: is he behind the podium ?  
A: yes  
Q: is he on a stage ?  
A: no  
Q: is this a sports park or regular park ?  
A: regular park  
Q: do you see any animals ?  
A: no  
Q: do you see trees ?  
A: yes

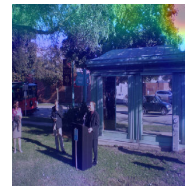

is it sunny ?  
A: yes  
GT: yes

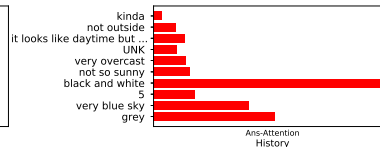

Q: is this in color ?  
A: yes  
Q: how many people do you see ?  
A: 3  
Q: how old does the man look ?  
A: 25  
Q: is he behind the podium ?  
A: yes  
Q: is he on a stage ?  
A: no  
Q: is this a sports park or regular park ?  
A: regular park  
Q: do you see any animals ?  
A: no  
Q: do you see trees ?  
A: yes  
Q: is he speaking into a mic ?  
A: yes

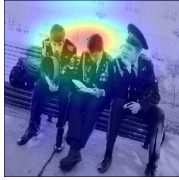

Q: what is the gender of the 3 people ?  
 A: on their backs are visible , they appear to be a male and female  
 GT: males

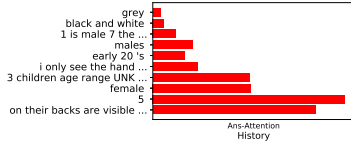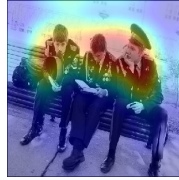

how old are they ?  
 A: maybe 40s  
 GT: about teens

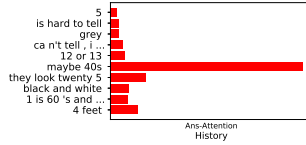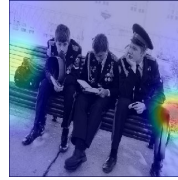

is this indoors ?  
 A: no  
 GT: no

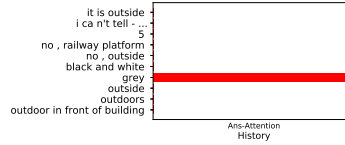

Q: what is the gender of the 3 people ?  
 A: males  
 Q: how old are they ?  
 A: about teens  
 Q: are they in fatigues or dress uniforms ?  
 A: dress

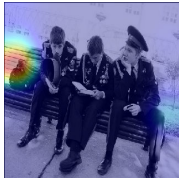

do you see buildings ?  
 A: in the background  
 GT: no

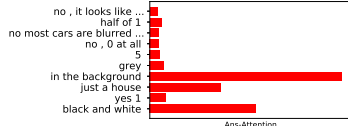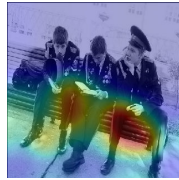

what color is the bench ?  
 A: grey  
 GT: ca n't tell

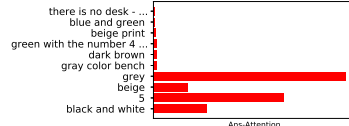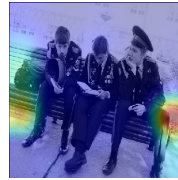

do you see a road ?  
 A: no  
 GT: no

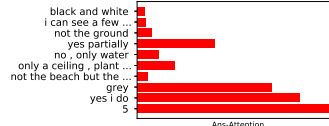

Q: what is the gender of the 3 people ?  
 A: males  
 Q: how old are they ?  
 A: about teens  
 Q: are they in fatigues or dress uniforms ?  
 A: dress  
 Q: is this indoors ?  
 A: no

Q: what is the gender of the 3 people ?  
 A: males  
 Q: how old are they ?  
 A: about teens  
 Q: are they in fatigues or dress uniforms ?  
 A: dress  
 Q: is this indoors ?  
 A: no  
 Q: do you see buildings ?  
 A: no

Q: what is the gender of the 3 people ?  
 A: males  
 Q: how old are they ?  
 A: about teens  
 Q: are they in fatigues or dress uniforms ?  
 A: dress  
 Q: is this indoors ?  
 A: no  
 Q: do you see buildings ?  
 A: no  
 Q: what color is the bench ?  
 A: ca n't tell

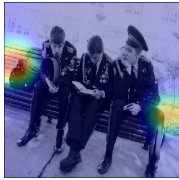

where do you think this is ?  
 A: ca n't tell that much  
 GT: not sure

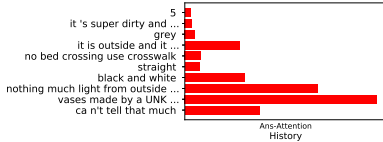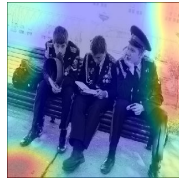

what 's the sky look like ?  
 A: night time , ca n't see the sky  
 GT: not n't know

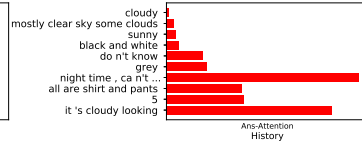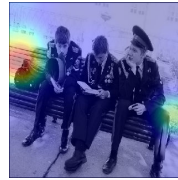

Q: what else can you tell about this image ?  
 A: nothing  
 GT: nothing

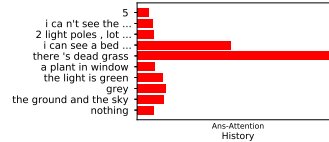

Q: what is the gender of the 3 people ?  
 A: males  
 Q: how old are they ?  
 A: about teens  
 Q: are they in fatigues or dress uniforms ?  
 A: dress  
 Q: is this indoors ?  
 A: no  
 Q: do you see buildings ?  
 A: no  
 Q: what color is the bench ?  
 A: ca n't tell  
 Q: do you see a road ?  
 A: no

Q: what is the gender of the 3 people ?  
 A: males  
 Q: how old are they ?  
 A: about teens  
 Q: are they in fatigues or dress uniforms ?  
 A: dress  
 Q: is this indoors ?  
 A: no  
 Q: do you see buildings ?  
 A: no  
 Q: what color is the bench ?  
 A: ca n't tell  
 Q: do you see a road ?  
 A: no  
 Q: where do you think this is ?  
 A: not sure

Q: what is the gender of the 3 people ?  
 A: males  
 Q: how old are they ?  
 A: about teens  
 Q: are they in fatigues or dress uniforms ?  
 A: dress  
 Q: is this indoors ?  
 A: no  
 Q: do you see buildings ?  
 A: no  
 Q: what color is the bench ?  
 A: ca n't tell  
 Q: do you see a road ?  
 A: no  
 Q: where do you think this is ?  
 A: not sure  
 Q: what 's the sky look like ?  
 A: do n't know
